## **Ending animal agriculture would stabilize greenhouse gas levels for 30 years and offset 70 percent of CO<sub>2</sub> emissions this century.**

**Michael B. Eisen<sup>1\*</sup> and Patrick O. Brown<sup>2,3\*</sup>**

<sup>1</sup> Department of Molecular and Cell Biology, Howard Hughes Medical Institute, University of California, Berkeley, CA 94720. <sup>2</sup> Department of Biochemistry (Emeritus), Stanford University School of Medicine, Stanford, CA 94305. <sup>3</sup> Impossible Foods, Redwood City, CA 94063.

\* Address correspondence to:

[mbeisen@berkeley.edu](mailto:mbeisen@berkeley.edu) and [pat.brown@impossiblefoods.com](mailto:pat.brown@impossiblefoods.com).

## **Abstract**

Animal agriculture contributes to global warming via ongoing emissions of the potent greenhouse gases methane and nitrous oxide, and displacement of biomass carbon on the land used to support livestock. We calculated the climate opportunity cost of the consumption of livestock products by modeling the combined effects of emission reduction and biomass recovery on atmospheric greenhouse gas levels under food-system scenarios ranging from “business as usual” to the complete elimination of animal agriculture. We found that, even in the absence of any other emission reductions, eliminating consumption of livestock products over the next 15 years would lead to rapid and persistent drops in atmospheric methane and nitrous oxide levels, and would slow carbon dioxide accumulation. This would produce a 30-year pause, from 2030 to 2060, in the rise of radiative forcing (a measure of the warming potential of the atmosphere), offset 70 percent of anthropogenic carbon dioxide emissions, and provide half of the emission reductions necessary to limit global warming to 2°C this century. The magnitude and rapidity of these potential effects should place the reduction or elimination of animal agriculture at the forefront of strategies for averting disastrous climate change.

## **Declaration of Conflict of Interest**

Patrick Brown is the founder and CEO of Impossible Foods, a company developing alternatives to animals in food-production. Michael Eisen is an advisor to Impossible Foods. Both are shareholders in the company and thus stand to benefit financially from reduction of animal agriculture.

## **Introduction**

The use of animals as a food-production technology has substantial negative impacts on our climate and environment. The historical reduction in terrestrial biomass as native ecosystems were transformed to support grazing livestock and the cultivation of feed and forage crops accounts for as much as a third of all anthropogenic CO<sub>2</sub> emissions to date (Hayek et al., 2021; Strassburg et al., 2020). Livestock, especially large ruminants, and their supply chains, also contribute significantly to anthropogenic emissions of the potent greenhouse gases methane and nitrous oxide (Gerber et al., 2013; MacLeod et al., 2018; Steinfeld et al., 2006).

Major cuts in food-linked emissions are likely necessary by 2075 to limit global warming to 1.5°C, even in the context of large-scale reduction in emissions from other sources (Clark et al., 2020). Some reductions can likely be achieved by increasing agricultural efficiency, reducing food waste, limiting excess consumption, increasing yields, and reducing the emission intensity of livestock production (Hristov et al., 2013a, 2013b; Montes et al., 2013). A recent analysis found that, of these options, a global transition to a plant-rich diet would be the most impactful (Clark et al., 2020)).

Nutritionally balanced plant-dominated diets are common and diverse (Agnoli et al., 2017; American Dietetic Association and Dietitians of Canada, 2003; Craig et al., 2009; Tilman and Clark, 2014; Willett et al., 2019). Their global adoption would have an immediate positive impact on greenhouse gas emissions (MacLeod et al., 2020, 2018; Steinfeld et al., 2006) and could play an important role in climate-change mitigation (Clark et al., 2020; Gerber et al., 2013).

Livestock account for approximately 15 percent of annual anthropogenic greenhouse gas emissions (Steinfeld et al., 2006), or around 7.5 Gt CO<sub>2</sub>eq, and recent estimates (Hayek et al., 2021; Strassburg et al., 2020) suggest that 800 Gt CO<sub>2</sub> equivalent carbon would be fixed via

photosynthesis if native biomass were allowed to recover on the 30 percent of Earth's land surface current devoted to livestock production.

Thus, crudely, eliminating animal agriculture would, by the end of the century, reduce emissions by 1,400 Gt, or around a third of all anthropogenic emissions if they continue at their current rate. This, however, likely understates the impact of dietary change on global warming, as warming is cumulative, and the beneficial effects on greenhouse gas levels of eliminating livestock would accrue rapidly via biomass recovery and decay of short-lived atmospheric methane.

Our goal here was to accurately quantify the full impact that contemporary animal agriculture has on the climate, taking into account the currently unrealized opportunities for emission reduction and biomass recovery together, and explicitly considering the impact of their kinetics on warming. Our approach differs from other recent studies in that we did not attempt to predict how global food production and consumption might change with growing populations, economic development, advances in agriculture, climate change and other socioeconomic factors.

Instead, we used publicly available, systematic data on livestock production in 2019 (FAO, 2021), livestock-linked emissions (FAO, 2021; MacLeod et al., 2018), and biomass recovery potential on land currently used to support livestock (Hayek et al., 2021; Strassburg et al., 2020) to predict how the elimination of all or parts of global animal agriculture production would alter 2019 net anthropogenic emissions. We then used a simple climate model to project how these changes would impact the evolution of atmospheric GHG levels and warming for the rest of the century, assuming that all other sources of emissions remain constant at 2019 levels.

We calculated the combined impact of reduced emissions and biomass recovery by comparing the cumulative reduction in the global warming potential of GHGs in the atmosphere for the remainder of the 21st century of different livestock replacement scenarios to those that would be

achieved by constant annual reductions in CO<sub>2</sub> emissions. Notably, we find that the gradual replacement, over the next 15 years, of the current livestock-rich global diet with a plant-only diet would have a beneficial effect on global warming equivalent to a 25-Gt annual reduction in CO<sub>2</sub> emissions, around 70 percent of anthropogenic CO<sub>2</sub> emissions.

## **Results**

### Modeling the effect of eliminating animal agriculture on GHG levels

To estimate current emissions due to animal agriculture, we scaled country-, species- and product-specific estimates of direct emissions from animal agriculture using the Global Livestock Environmental Assessment Model (MacLeod et al., 2018), with country-specific data on primary production of livestock products from the Food and Agriculture Organization (FAO) database FAOSTAT (FAO, 2021).

Based on this analysis, in 2019 (the most recent year for which full data are available), global production of animal-derived foods led to direct emissions of 1.6 Gt CO<sub>2</sub>, due primarily to energy use (as our model assumes constant overall rates of consumption, we excluded emissions due to land clearing, which are associated with agricultural expansion), 120 Mt CH<sub>4</sub> due to enteric fermentation and manure management, and 7.0 Mt N<sub>2</sub>O due primarily to fertilization of feed crops and manure management (Figure 1 and Figure 1-S1). These numbers are consistent with other recent estimates (Gerber et al., 2013; Steinfeld et al., 2006), and correspond, respectively, to four percent of CO<sub>2</sub>, 35 percent of CH<sub>4</sub> and 66 percent of N<sub>2</sub>O emissions from all human activities.

To model the recovery of biomass on land currently used in livestock production, we used the median estimate of (Hayek et al., 2021), who used satellite imagery of biomass and geographically-resolved agricultural data to estimate that the return of land currently used in

livestock production to its native state would sequester, over 30 years, 216 Gt of carbon in plant and non-living biomass. A similar estimate was obtained by (Strassburg et al., 2020).

We considered several dietary perturbations, including the immediate replacement of all animal agriculture with a plant-only diet (IMM-POD), a more realistic gradual transition, over a period of 15 years, to a plant-only diet (PHASE-POD), and versions of these where only specific animal products were replaced. We compared the effects of these diets to a “business as usual” (BAU) diet in which agricultural emissions were projected to continue at current levels.

We assumed in all these hypothetical scenarios that non-agricultural emissions would remain constant; that food from livestock is replaced on a protein-equivalent basis by soy protein; and that, when land is removed from livestock production, the conversion of atmospheric CO<sub>2</sub> into terrestrial biomass occurs linearly over the subsequent thirty years;

We emphasize that we are not predicting what will happen to global diets. Rather we are projecting simplified scenarios of dietary change forward through time to characterize and quantify the climate impact of current animal agriculture production. The climate model for these projections is also intentionally simple, considering only the partition of terrestrial emissions into the atmosphere, and the decay of methane and nitrous oxide, although it replicates the qualitative behavior of widely used MAGICC6 (Meinshausen et al., 2011).

Figure 2 shows annual emissions and projected atmospheric levels of CO<sub>2</sub>, CH<sub>4</sub> and N<sub>2</sub>O under BAU and PHASE-POD through the end of the century (projections for IMM-POD and additional scenarios are shown in the supplemental versions of Figure 2).

The impact of PHASE-POD on CO<sub>2</sub> emissions would be greatest in the period between 2030 and 2060, when biomass recovery on land previously occupied by livestock or feed crops reaches its peak, slowing the rise of atmospheric CO<sub>2</sub> levels during this interval.

Atmospheric CH<sub>4</sub> and N<sub>2</sub>O levels continue to increase in both BAU and PHASE-POD during the transition period, but begin to drop in PHASE-POD as the abatement of animal agriculture-linked emissions accelerates. CH<sub>4</sub>, with a half-life in the atmosphere of around 9 years, approaches a new and lower steady-state level towards the end of the century, while N<sub>2</sub>O, with a half-life of around 115 years, does so over a longer time-scale.

To capture the combined global-warming impact of the changing levels of these GHGs, we estimated radiative forcing (RF), the reduction in radiative cooling by GHG absorption of infrared radiation, using the formulae described in (Myhre et al., 1998; Shine, 2000).

Figure 3 shows that with PHASE-POD there would effectively be no net increase in RF between 2030 and 2060. And even after that 30-year pause in the previously monotonically increasing global warming potential of the atmosphere, the difference in RF between the POD and BAU scenarios would continue to increase, due to the absence of direct emissions from animal agriculture and the continuing decay of previously emitted CH<sub>4</sub> and N<sub>2</sub>O towards lower steady-state values.

### Eliminating animal agriculture would achieve half of the emission reductions needed to meet Paris Agreement GHG targets

By the end of the century the RF under the PHASE-POD scenario would be 3.8 Wm<sup>-2</sup> compared to 4.9 Wm<sup>-2</sup> for BAU. To put this difference in perspective, phasing out animal agriculture over the next 15 years would reduce RF in 2100 by the same amount as eliminating 1,690 gigatons of CO<sub>2</sub> emissions (Figure 4-S1), the equivalent of 47 years of all anthropogenic CO<sub>2</sub> emissions at the current rate of 36 Gt/year.

In 2010, the climate modeling community defined a series of four “Representative Concentration Pathways” that capture a wide range of future warming scenarios, leading to 2100 RF levels of



8.5, 6.0, 4.5 and 2.6 Wm<sup>-2</sup> (which is approximately the RF of current atmospheric greenhouse gas levels), respectively (Moss et al., 2010; van Vuuren et al., 2011). These model pathways were extended after the Paris Agreement to include a target of 1.9 Wm<sup>-2</sup>. Although the exact relationship between RF and global warming is incompletely understood, 2100 RF values of 1.9 and 2.6 Wm<sup>-2</sup> are generally used as targets for limiting warming in this century to 1.5°C and 2.0°C, respectively, over the baseline pre-industrial global average temperature (IPCC, 2018).

Reducing 2100 RF from 4.9 Wm<sup>-2</sup> under BAU to 2.6 Wm<sup>-2</sup> would require a reduction of atmospheric CO<sub>2</sub> levels by 199 ppm, equivalent to 3,160 Gt of CO<sub>2</sub> emissions (Figure 4 and Figure 4-S1), and an additional 47 ppm reduction, equivalent to 740 Gt of CO<sub>2</sub> emissions, would be required to reach 1.9 Wm<sup>-2</sup>.

Thus the 1,690 gigatons of CO<sub>2</sub> emissions reduction in RF from the phased elimination of animal agriculture, would, without any other intervention to reduce GHG emissions, achieve 53 percent of the net GHG emissions reductions necessary to reach the 2100 RF target of 2.6 Wm<sup>-2</sup> and 43 percent of the emissions reductions necessary to reach the 1.9 Wm<sup>-2</sup> target.

### Eliminating animal agriculture would offset 70 percent of anthropogenic CO<sub>2</sub> emissions this century

While widely used, such single point estimates of radiative forcing tell an incomplete story, as temperature change, and other climate impacts, depend cumulatively on the temporal trajectories of changing atmospheric greenhouse gas levels.

To capture such dynamic effects, we computed, for each dietary scenario, the integral with respect to time of the RF difference between the scenario and BAU, from 2021 (the start of the intervention in this model) to a given year “y”. We designate this cumulative RF difference for year y, CRFD<sup>y</sup>. We then determined, for each dietary scenario and year y, what level of

reduction in annual CO<sub>2</sub> emissions alone, relative to BAU, would yield the same CRFD<sup>y</sup>, and designate this annual CO<sub>2</sub> equivalent aCO<sub>2</sub>eq<sup>y</sup> (see Figures 5-S1 to 5-S4 for details of these equivalences).

aCO<sub>2</sub>eq<sup>y</sup> is an extension of the CO<sub>2</sub>eq commonly used to represent global warming potential (Myhre et al., 2013), except that CO<sub>2</sub>eq represents the cumulative warming impact of an emission pulse over a standard time frame (typically 100 years), while aCO<sub>2</sub>eq<sup>y</sup> represents the cumulative impact of ongoing emission reductions over a selected interval (2021 through year *y*).

Figure 5 shows the aCO<sub>2</sub>eq for different scenarios for reference years 2050 and 2100 (Figure 5-S5 shows the full dependence of aCO<sub>2</sub>eq on the reference year). The aCO<sub>2</sub>eq for a 15-year phaseout of animal agriculture through 2100 is -25.0 Gt/year, meaning that this change in current diets would negate 70 percent of anthropogenic CO<sub>2</sub> emissions through the end of the century, assuming they continue at their current rate of 36 Gt/year.

#### The climate impact of animal agriculture is dominated by ruminants, especially cattle

To analyze the climate impact of specific animal products, and to attribute these impacts on a per unit basis, we considered scenarios involving the immediate elimination and 15 year phaseout of individual animal products or groups of related products, using the species- and product-specific emissions and land use values described above (Figure 5; see also Table 1).

Using aCO<sub>2</sub>eq<sup>2100</sup> as our primary measure of product-specific effects, beef accounts for 47 percent of the benefits of phasing out all animal agriculture, and cow milk 24 percent.

Collectively, meat and milk from bovids (cattle and buffalo) account for 80 percent of the climate opportunity. Although they account for less than 19% of the protein in the human diet, ruminants (cattle, buffalo, sheep and goats) collectively account for 90 percent of the aCO<sub>2</sub>eq<sup>2100</sup> of all livestock.

These reductions in annual CO<sub>2</sub> emissions arising from reductions in consumption of a specific animal product can be interpreted on a per product unit basis (Figure 6). For example, the contribution per kilogram of beef consumption eliminated to the overall GHG-emissions impact of eliminating beef production amounts to -470 kg CO<sub>2</sub>eq (-21.2 Gt/year for 68 Mt/year beef). This value for cattle meat is typical of ruminants (Figure 6B; 280 to 550 kg CO<sub>2</sub>eq per kg consumer product), which also have the highest values on a per protein basis (Figure 6C; 1,410 to 2,550 kg CO<sub>2</sub>eq per kg protein). The most efficient products on a per protein basis are chicken meat (77 kg CO<sub>2</sub>eq per kg protein) and eggs (68 kg CO<sub>2</sub>eq per kg protein), roughly 12 times lower than emissions for the same amount of protein from ruminants (940 kg CO<sub>2</sub>eq per kg protein).

To put these numbers in more familiar units, we converted the aCO<sub>2</sub>eq to the distance one would have to drive a typical car (Bureau of Transportation Statistics, 2021) to produce the same emissions (Figures 6B and C). One kg of beef, for example, has the same emissions impact as driving 1,906 km in a typical US car (or 537 miles per pound of beef).

## Discussion

### Caveats and Considerations

This analysis only considered consumption of terrestrial animal products, neglecting the considerable emissions and land use (via feed production) associated with seafood capture and aquaculture. While the land and emissions impact of seafood consumption has received comparably little attention, several studies have pointed to at least 500 Mt of CO<sub>2</sub> equivalent emissions per year from seafood (MacLeod et al., 2020; Parker et al., 2018; Poore and Nemecek, 2018). Recent work has also suggested that the disruption of carbon storage due to seafood harvesting via trawling has an effect equivalent of approximately 1.0 Gt of CO<sub>2</sub>

emissions per year (Sala et al., 2021). Based on these published estimates, accounting for seafood consumption would increase the impact of animal food consumption measured in 2100 by the equivalent of an additional approximately 120 Gt CO<sub>2</sub>.

There are several sources of uncertainty in estimating carbon sequestration on land repurposed from animal agriculture. We use the mean values calculated by (Hayek et al., 2021) for carbon opportunity in living biomass of 560 Gt and soil and litter of 230 Gt CO<sub>2</sub> equivalent carbon, but there is large uncertainty in these estimates, especially around soil carbon.

Further research is required to define optimal management practices for recovery of ecosystems currently impacted by animal agriculture and to estimate the rate and magnitude of their potential impact on climate and biodiversity. Although the general assumption is that saturation will occur within 30 years (Griscom et al., 2017; Hayek et al., 2021), there is likely to be local variation (Lennox et al., 2018; N'Guessan et al., 2019; Poorter et al., 2016). Deliberate, active management of ecosystem recovery to optimize for carbon sequestration could accelerate and increase the magnitude of carbon storage on land transitioning from intensive agricultural use (Griscom et al., 2017), while providing livelihoods for the farmers and ranchers currently working on that land, and continuing to support the associated rural communities.

Our estimates of the emissions and land use associated with a BAU diet are intentionally conservative, as we chose not to account for projected continuing increases in population and per capita meat and dairy consumption. It is worth noting that substantial reductions in land use and net greenhouse gas emissions could be achieved by switching meat consumption from ruminants, especially cattle, to non-ruminants like pig and chicken, although even non-ruminant livestock systems would still have substantially greater impact on land use, water consumption and pollution, biodiversity and climate than plant-only diets.

Widely used climate models consider many things ours does not, including: temporal and spatial variation in emissions; feedback between a changing climate and anthropogenic and natural emissions, carbon sequestration, atmospheric chemistry and warming potential; the impact of climate on human social, political and economic behavior. Ours does not. We compared our outputs to those from several such models using publicly available data from (Riahi et al., 2017) and found them to be in broad qualitative agreement. Thus, while other models could provide more precise estimates, we do not believe they would alter our major conclusions.

### Perspective

Our analysis has provided a quantitative estimate of the potential climate impact of a hypothetical, radical global change in diet and agricultural systems. Unlike solutions aimed at replacing fossil-fuel combustion, which would merely abate further increases in carbon dioxide, reducing or eliminating the use of animals as food technology would “turn back the clock” on emissions, through decay of methane and nitrous oxide, and carbon fixation by photosynthesis, restoring biomass and biodiversity on the vast land areas currently impacted by grazing and feed-crop cultivation. Reductions in animal agriculture should therefore move to the forefront of climate-defense strategies, along with research to define and optimize the environmental, public health, food security, economic, political and social consequences of such a shift.

A transition away from animal agriculture would entail many challenges. The economic and social impacts would be acute in many regions and locales. Substantial global investment would be needed to ensure that the people who currently make a living from animal agriculture do not suffer when it is reduced or replaced. But that investment must be compared to the economic and humanitarian disruptions of significant global warming (Howard and Sylvan, 2021; Stehfest et al., 2019).

The scale of global animal agriculture continues to grow, along with its negative impact on the climate, driven by rising incomes (OECD-FAO Agricultural Outlook 2020-2029). If today's per capita animal-product consumption in wealthy, highly industrialized countries (OECD) were extended to the global population, and land use rates remained the same, an additional 46 million km<sup>2</sup> - an area roughly equal to the combined area of Africa and South America - would be needed to support the required growth in livestock populations.

The destruction of this much of Earth's critical remaining native ecosystems would have catastrophic impacts on the climate, global biodiversity (Newbold et al., 2015; World Wildlife Fund, 2020) and human health (Clark et al., 2019; Maron et al., 2018; Oliver et al., 2015; Satija et al., 2017; Springmann et al., 2016; Strassburg et al., 2020; Tilman and Clark, 2014).

Global plant-only diets are feasible without major alterations to non-animal agriculture. Animal products currently provide, according to the most recent data from FAOSTAT, 17 percent of the calories, 35 percent of the protein and 45 percent of the fat in the human food supply. These could be replaced by calories, protein and fat from existing crops, with a vastly reduced land, water, GHG and biodiversity impact and only minor adjustments to optimize nutrition (Springmann et al., 2018). The protein yield of the 2019 global soybean crop alone, grown on 0.92 percent of Earth's ice-free land surface, was equivalent to 137% of all protein obtained from terrestrial livestock (FAO, 2021).

Given these realities, it is surprising that changes in food production and consumption are not at the forefront of proposed strategies for fighting climate change. None of the mitigation strategies presented as part of the recent Intergovernmental Panel on Climate Change (IPCC) report on steps needed to keep global warming below 1.5°C (IPCC, 2018) propose even a reduction in per capita livestock consumption below current levels (Figure 7). They rely instead on currently

non-existent and unproven carbon capture and storage technologies being deployed in the second half of the century.

Although dietary change would be hugely impactful, changes in our food-production system alone are not sufficient to stop and reverse climate change in this century. Transition to renewable energy systems, perhaps complemented by converting a fraction of the land once used for livestock production into carbon ranches (Clarke et al., 2014) will be essential to reach the goal of limiting global warming to 1.5°C (Clark et al., 2020). But, crucially, phasing out consumption of animal products, especially those from cattle, from the human diet today, could yield a three-decade pause in net accumulation of the greenhouse gasses that drive global warming. Such a pause would provide a window of opportunity to develop the technologies required to achieve permanent net-zero emissions, along with the political will to implement them globally.

| Species  | Commodity | Primary Production | Protein Production | Emissions CO <sub>2</sub> | Emissions CH <sub>4</sub> | Emissions N <sub>2</sub> O | Land Use         | aCO <sub>2</sub> eq | Emissions Intensity        | Emissions Intensity                   | Driving Equivalents |
|----------|-----------|--------------------|--------------------|---------------------------|---------------------------|----------------------------|------------------|---------------------|----------------------------|---------------------------------------|---------------------|
|          |           | tonnes             | tonnes protein     | Mt                        | Mt                        | Mt                         | Mkm <sup>2</sup> | Gt/year             | kg aCO <sub>2</sub> per kg | kg aCO <sub>2</sub> eq per kg protein | km driven per kg    |
| Buffalo  | Meat      | 4,290,212          | 619,200            | 29                        | 5.00                      | 0.20                       | 1.0              | -1.6                | -554                       | -2557                                 | 2248                |
| Cattle   | Meat      | 67,893,363         | 10,435,590         | 236                       | 49.30                     | 2.41                       | 17.1             | -21.2               | -469                       | -2036                                 | 1906                |
| Sheep    | Meat      | 9,648,245          | 1,354,398          | 32                        | 5.02                      | 0.33                       | 2.5              | -2.9                | -445                       | -2105                                 | 1807                |
| Goats    | Meat      | 6,128,372          | 821,383            | 21                        | 3.34                      | 0.11                       | 0.8              | -1.2                | -284                       | -1410                                 | 1154                |
| Pigs     | Meat      | 110,102,495        | 14,447,438         | 278                       | 7.19                      | 0.62                       | 1.6              | -2.6                | -35                        | -178                                  | 142                 |
| Chickens | Meat      | 123,898,557        | 17,393,440         | 306                       | 0.29                      | 0.52                       | 1.3              | -1.3                | -17                        | -77                                   | 67                  |
| Chickens | Meat      | 7,363,110          | 1,044,797          | 27                        | 0.02                      | 0.05                       | 0.1              | -0.1                | -20                        | -95                                   | 83                  |
| Buffalo  | Milk      | 133,752,296        | 4,510,017          | 119                       | 10.87                     | 0.45                       | 1.2              | -2.6                | -20                        | -584                                  | 80                  |
| Cattle   | Milk      | 712,883,270        | 23,889,273         | 338                       | 37.63                     | 1.78                       | 6.3              | -10.8               | -15                        | -451                                  | 62                  |
| Sheep    | Milk      | 10,172,020         | 624,048            | 10                        | 1.72                      | 0.12                       | 0.1              | -0.4                | -35                        | -576                                  | 142                 |
| Goats    | Milk      | 18,752,379         | 702,585            | 10                        | 1.74                      | 0.06                       | 0.2              | -0.4                | -21                        | -555                                  | 84                  |
| Chickens | Eggs      | 88,361,696         | 10,982,733         | 159                       | 0.57                      | 0.35                       | 0.6              | -0.7                | -8                         | -68                                   | 34                  |

**Table 1.** Product-specific emissions, land use and inferred impacts

Primary production data aggregated from FAOSTAT for 2019. Protein production data calculated from primary production data and protein conversion factors inferred from GLEAM. Emissions data based on protein production data and emission intensities from GLEAM. Land use data calculated from FAOSTAT protein production data and product-specific land use data from (Poore and Nemecek, 2018). Annualized CO<sub>2</sub> equivalent emissions are for 2050 and calculated from atmospheric modeling results.



## **Methods**

### Data and Code Availability

Analyses were carried out in Python using Jupyter notebooks. All data, analyses and results presented here are available at [github.com/mbeisen/LivestockClimateImpact](https://github.com/mbeisen/LivestockClimateImpact).

### Updating Estimates of Emissions from Animal Agriculture

We obtained country, species, herd and product type specific CO<sub>2</sub>, CH<sub>4</sub> and N<sub>2</sub>O emission data for terrestrial livestock from the public version of GLEAM 2.0 (MacLeod et al., 2018) downloaded from <http://www.fao.org/gleam/results/en/>. GLEAM contains data for cattle, buffalo, sheep, goats, pigs and chickens, and attributes emissions to meat, milk and eggs. Although GLEAM further breaks down emissions based on herd type and production system, we used aggregate data for all herds and production types in the country. We did not include CO<sub>2</sub> emissions linked to land-use change, as this is associated with increases in livestock production which are explicitly not considered by our model.

We obtained livestock production data for 2019 (the most recent year available) from the “Production\_LivestockPrimary” datafile in FAOSTAT (FAO, 2021). We extracted from Production\_LivestockPrimary the amount (in tonnes), for all countries, of primary domestic production of meat from cattle, buffalo, sheep, goat, pig, chicken and duck, milk from cows, buffalo, sheep and goat, and eggs from poultry. We computed meat and protein yields from the carcass weight data reported by GLEAM.

We scaled the GLEAM emission data reported for entire herds based on carcass weight for meat, and production weight for milk and eggs. As GLEAM does not provide data for ducks, we

used values for chicken. The scaling was done using country-specific livestock production data and regional data from GLEAM.

### Estimating species-specific land use

We combined livestock production data with average species and product-specific land use data from (Poore and Nemecek, 2018) to estimate species, product and country-specific land use data associated with animal agriculture. We use data for cattle meat for buffalo meat, and cow milk for milk from buffalo, goat and sheep. The data are reported in  $\text{mm}^2(\text{year})(100\text{g protein})^{-1}$  except for milk which is reported in  $\text{m}^2(\text{year})(\text{liter})^{-1}$  which we convert to  $\text{m}^2(\text{year})(\text{kg primary production})^{-1}$  using conversion factors inferred from GLEAM, which reports both protein and primary production data.

The total land use for animal agriculture inferred from this analysis is 33.7 million  $\text{km}^2$ , almost identical to the 33.2 million  $\text{km}^2$  estimated by (Hayek et al., 2021) from satellite imagery.

### Emissions from Agriculture

We used the Environment\_Emissions\_by\_Sector\_E\_All\_Data\_(Normalized) data table from FAOSTAT, projecting from the most recent year of 2017 to 2018 by assuming the average annual growth from 2000 to 2017 continues.

### Diet-Linked Emissions

We modeled agricultural emissions under a business as usual (BAU) diet as remaining at 2019 levels. When modeling reductions in livestock consumption, we replaced livestock products with soybeans on a protein-weight replacement level using emissions data from (Behnke et al., 2018). For diets involving the removal of one or more specific animal products, we scaled these

dietary replacement emissions by the fraction of animal protein obtained from that product, and scaled biomass recovery by the fraction of animal agriculture land attributed to that product.

### Emissions Projections

In all scenarios we assume annual non-agricultural emissions remain fixed at 2019 levels through 2100. For a BAU diet we added in agricultural emissions, effectively fixing total emissions at 2019 levels. For the POD we assumed a 15-year phaseout of animal agriculture with an accelerated rate of conversion from BAU to POD or BFD. The specific formula we use

$$\text{is } f(\text{year}) = e^{-5 * \left(\frac{\text{year} - 2020}{15}\right)^3}$$

yielding the conversion dynamics shown below:

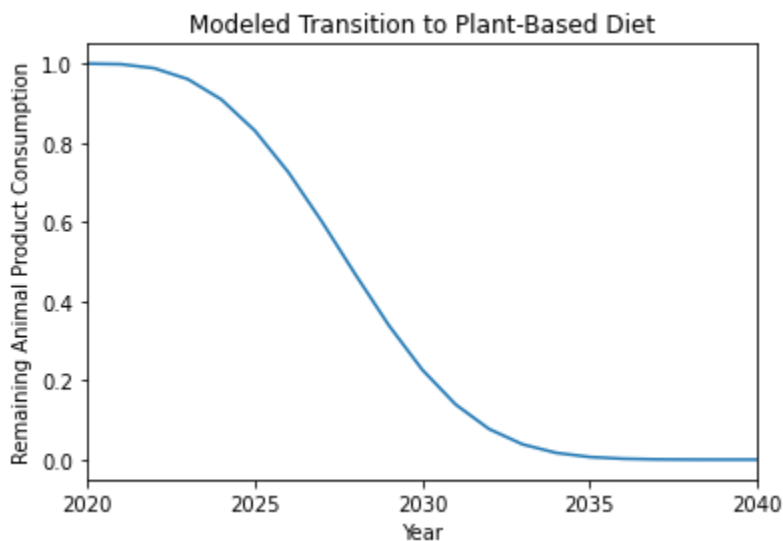

We also include in the supplemental data a version of the analysis in which the hypothetical transition is instantaneous.

As the transition from BAU to POD or BFD occurs, agriculture linked emissions are set to

$$E_{food} = fE_{BAU} + (1 - f)E_{POD}$$

Where  $f$  is the fraction of the global diet that is still BAU.

We assume that, when animal-derived food consumption is reduced in a year by a fraction  $\Delta f$ , that carbon recovery on a corresponding fraction of land begins immediately and continues at a constant rate until it reaches 100 percent after 30 years (or, for the analysis depicted in Figure 2-S2, 50 years).

### Converting between emissions and atmospheric concentrations of GHGs

The total mass of gas in the atmosphere is  $5.136 \times 10^{21}$  g, at a mean molecular weight of 28.97 g/mole (Walker, 1977), or is  $1.77 \times 10^{20}$  total moles of gas. Hence 1 ppb is  $1.77 \times 10^{11}$  moles and 1 ppm is  $1.77 \times 10^{14}$  moles.

We therefore use conversions from mass in Gt to ppb/ppm as follows:

$$CO_2 \text{ ppm} = CO_2 \text{ Gt} * \frac{10^{15} \text{ g}}{\text{Gt}} * \frac{1 \text{ mole}}{44 \text{ g}} * \frac{1 \text{ ppm}}{1.77 \times 10^{14} \text{ mole}} * f_{\text{sink}}$$

$$CH_4 \text{ ppb} = CH_4 \text{ Mt} * \frac{10^{12} \text{ g}}{\text{Mt}} * \frac{1 \text{ mole}}{16 \text{ g}} * \frac{1 \text{ ppb}}{1.77 \times 10^{11} \text{ mole}}$$

$$N_2O \text{ ppb} = N_2O \text{ Mt} * \frac{10^{12} \text{ g}}{\text{Mt}} * \frac{1 \text{ mole}}{44 \text{ g}} * \frac{1 \text{ ppb}}{1.77 \times 10^{11} \text{ mole}}$$

We use an  $f_{\text{sink}}$  value of 0.50 reflecting the observation that approximately half of terrestrial  $CO_2$  emissions end up in land or ocean sinks rather than the atmosphere (Houghton, 2003).

### Estimating global non-anthropomorphic emissions

Both CH<sub>4</sub> and N<sub>2</sub>O decay at appreciable rates, with half-lives of approximately 9 years for CH<sub>4</sub> (Morgenstern et al., 2017) and 115 years for N<sub>2</sub>O (Prather et al., 2015), although these estimates are being continuously updated (Saunois et al., 2020). We balanced the corresponding decay equations against historical emissions and atmospheric levels, inferring unaccounted for and presumably non-anthropogenic sources leading to mole fraction equivalent increases of CH<sub>4</sub> of 25 ppb/year and N<sub>2</sub>O of 1.0 ppb/year.

### Projections of Atmospheric Gas Levels

We ran projections on an annual basis starting in 2020 and continuing through 2100. For each gas:

$$P_{gas}^{year+1} = P_{gas}^{year} (1 - A_{gas}) + E_{gas}^{year} + N_{gas}$$

where:

$P_{gas}^{year}$  is the atmospheric concentration of *gas* in *year* in ppb for CH<sub>4</sub> and N<sub>2</sub>O and ppm for

CO<sub>2</sub>

$A_{gas}$  is the annual decay of *gas* and is equal to  $(\frac{1}{2})^{\frac{1}{H_{gas}}}$  where  $H_{gas}$  is the half-life of *gas* (we

assume that CO<sub>2</sub> does not decay)

$$H_{CH_4} = 9.0 \text{ years} \quad H_{N_2O} = 115.0 \text{ years}$$

$E_{gas}^{year}$  is the emissions of *gas* in *year* converted to atmospheric ppb for CO<sub>2</sub> and N<sub>2</sub>O and

ppm for CO<sub>2</sub> as described above

$N_{gas}$  is the constant term to account for emissions not captured in  $E$

$$N_{CH_4} = 25.0 \text{ ppb} \quad N_{N_2O} = 1.0 \text{ ppb}$$

Starting conditions are:

$$P_{CO_2}^{2020} = 409.8 \text{ ppm} \quad P_{CH_4}^{2020} = 1863.9 \text{ ppb} \quad P_{N_2O}^{2020} = 332.5 \text{ ppb}$$

## Radiative Forcing

We adopt the commonly used formula for radiative forcing (RF) which derives from (Myhre et al., 1998; Ramaswamy et al., 2001) as modified in the climate modeling program MAGICC6 (Meinshausen et al., 2011).

Given atmospheric concentration of  $C$  ppm  $CO_2$ ,  $M$  ppb  $CH_4$  and  $N$  ppb  $N_2O$

$$RF(C, M, N) = \Delta F = \Delta F_{CO_2} + \Delta F_{CH_4} + \Delta F_{N_2O}$$

$$\Delta F_{CO_2} = \alpha_{CO_2} \ln \frac{C}{C_0}$$

$$\alpha_{CO_2} = 5.35$$

$$\Delta F_{CH_4} = \alpha_{CH_4} \left( (1 + \beta_{CH_4}) (\sqrt{M} - \sqrt{M_0}) + f(M, N_0) + f(M_0, N_0) \right)$$

$$\alpha_{CH_4} = 0.036 \quad \text{and} \quad \beta_{CH_4} = 0.15$$

$$\Delta F_{N_2O} = \alpha_{N_2O} (\sqrt{N} - \sqrt{N_0} + f(M_0, N) + f(M_0, N_0))$$

$$\alpha_{N_2O} = 0.12$$

The function  $f(m, n) = 0.47 \ln(1 + 0.6356(\frac{mn}{10^6})^{.75} + 0.007(\frac{m}{10^3})(\frac{mn}{10^6})^{1.52}$  captures the overlap in spectra between CH<sub>4</sub> and N<sub>2</sub>O.

$C_0$ ,  $M_0$  and  $N_0$  are the preindustrial levels of the corresponding gasses.

$$C_0 = 278 \text{ ppm} \quad M_0 = 700 \text{ ppb} \quad N_0 = 270 \text{ ppb}$$

### Computing Emissions and Land Carbon Opportunity Cost

We define the combined emissions and land carbon opportunity cost (ELCOC) of animal agriculture as  $2\Delta C$  where

$$RF(C_{BAU} - \Delta C, M_{BAU}, N_{BAU}) = RF(C_{POD}, M_{POD}, N_{POD})$$

The factor of 2 accounts for the half of CO<sub>2</sub> emissions that go to terrestrial sinks.

### Computing Carbon Emissions Budgets for RF 2.6 and 1.9

As RF calculations used in climate models account for other gasses and effects beyond the three gasses used here, we used multivariate linear regression as implemented in scikit-learn to predict the complete RF output of MAGICC6 using data data downloaded from the Shared Socioeconomic Pathways (SSPs) (Riahi et al., 2017). The model was trained on atmospheric concentrations of CO<sub>2</sub>, CH<sub>4</sub> and N<sub>2</sub>O to predict the difference between the MAGICC6 RF and the RF as calculated above. Then, for timepoints in our scenarios we computed RF as above from CO<sub>2</sub>, CH<sub>4</sub> and N<sub>2</sub>O concentrations, and add to this the adjustment from the linear regression model. We use this RF in Figures 3 and 4.

In the SSP file:

C = Diagnostics|MAGICC6|Concentration|CO<sub>2</sub>

M = Diagnostics|MAGICC6|Concentration|CH<sub>4</sub>

N = Diagnostics|MAGICC6|Concentration|N<sub>2</sub>O

$\Delta F_{CO_2}$  = Diagnostics|MAGICC6|Forcing|CO<sub>2</sub>

$\Delta F_{CH_4}$  = Diagnostics|MAGICC6|Forcing|CH<sub>4</sub>

$\Delta F_{N_2O}$  = Diagnostics|MAGICC6|Forcing|N<sub>2</sub>O

MAGICC6 RF = Diagnostics|MAGICC6|Forcing

### aCO<sub>2</sub>eq

We computed the CO<sub>2</sub> emission equivalents of perturbations to BAU emissions using the simulations described above to determine the RF of both BAU and the perturbation for years from 2020 through 2200. We then calculated the cumulative RF difference (CRFD) between the perturbation and BAU for each year, and determined, for each year, the equivalent annual reduction in CO<sub>2</sub> emissions relative to BAU required to produce the same CRFD. This value, which we refer to as the annualized CO<sub>2</sub> equivalent, abbreviated aCO<sub>2</sub>eq, is a function of the perturbation and reference year. In the text we report aCO<sub>2</sub>eq for 2050 (30 year time horizon) and 2100 (80 year time horizon).

### Product equivalents

To compute per product unit and per protein emissions equivalents, we divided aCO<sub>2</sub>eq<sup>2050</sup> for immediate elimination of the product (in kg CO<sub>2</sub>eq/year) by the annual production of the product (in kg production/year) yielding a per product unit emission equivalent measured in kg CO<sub>2</sub>eq



per kg production.

For example, assuming, as our model does, that emissions and land use scale with consumption, if annual beef consumption were reduced by one tonne (1,000 kg) per year, it would result in corresponding annual reductions of -3,476 kg CO<sub>2</sub>, -726 kg CH<sub>4</sub> and -36 kg N<sub>2</sub>O, and would initiate 30 year biomass recovery of 6,050,000 kg of CO<sub>2</sub> equivalent carbon on 25.2 ha of land.

The cumulative reduction in RF, through 2050, of such annual emissions reductions and biomass recovery would be equivalent to a CO<sub>2</sub> emission reduction of 310,000 kg/year. The ratio of these two rates, -310,000 kg CO<sub>2</sub>eq/year over 1,000 kg beef/year yields -310 kg CO<sub>2</sub>eq per kg beef as a measure of the warming impact of one kg of beef. Adjusting this for the dressing percentage of beef (the values reported by FAO, and used in these calculations, are carcass weight, of which only approximately  $\frac{2}{3}$  ends up as a consumer product) yields the value shown in Figure 6 of -470 kg CO<sub>2</sub>eq per kg consumer beef.

For meat products we first scaled the production amount by a typical dressing percentage of  $\frac{2}{3}$  to convert to consumer product units. For protein unit equivalents we used protein yields from GLEAM. To convert to driving equivalents we assumed fuel efficiency of 22.2 miles per gallon and emission intensities of 8.8 kg CO<sub>2</sub> per gallon.

## References

- Agnoli C, Baroni L, Bertini I, Ciappellano S, Fabbri A, Papa M, Pellegrini N, Sbarbati R, Scarino ML, Siani V, Sieri S. 2017. Position paper on vegetarian diets from the working group of the Italian Society of Human Nutrition. *Nutr Metab Cardiovasc Dis* **27**:1037–1052. doi:10.1016/j.numecd.2017.10.020
- American Dietetic Association, Dietitians of Canada. 2003. Position of the American Dietetic Association and Dietitians of Canada: vegetarian diets. *Can J Diet Pract Res* **64**:62–81. doi:10.3148/64.2.2003.62
- Behnke GD, Zuber SM, Pittelkow CM, Nafziger ED, Villamil MB. 2018. Long-term crop rotation and tillage effects on soil greenhouse gas emissions and crop production in Illinois, USA. *Agric Ecosyst Environ* **261**:62–70. doi:10.1016/j.agee.2018.03.007
- Clarke L, Jiang K, Akimoto K, Babiker M, Blanford G, Fisher-Vanden K, Hourcade JC, Krey V, Krieglner E, Löschel A, Others. 2014. Climate Change 2014: Mitigation of Climate Change. Contribution of Working Group III to the Fifth Assessment Report of the Intergovernmental Panel on Climate Change ed O Edenhofer et al.
- Clark MA, Domingo NGG, Colgan K, Thakrar SK, Tilman D, Lynch J, Azevedo IL, Hill JD. 2020. Global food system emissions could preclude achieving the 1.5° and 2°C climate change targets. *Science* **370**:705–708. doi:10.1126/science.aba7357
- Clark MA, Springmann M, Hill J, Tilman D. 2019. Multiple health and environmental impacts of foods. *Proc Natl Acad Sci U S A* **116**:23357–23362. doi:10.1073/pnas.1906908116
- Craig WJ, Mangels AR, American Dietetic Association. 2009. Position of the American Dietetic Association: vegetarian diets. *J Am Diet Assoc* **109**:1266–1282.
- FAO. 2021. FAOSTAT. FAOSTAT. <http://www.fao.org/faostat/en/#home>
- Gerber PJ, Steinfeld H, Henderson B, Mottet A, Opio C, Dijkman J, Falcucci A, Tempio G. 2013. Tackling Climate Change through Livestock: A global assessment of emissions and mitigation opportunities. *Food and Agriculture Organization of the United Nations*.
- Griscom BW, Adams J, Ellis PW, Houghton RA, Lomax G, Miteva DA, Schlesinger WH, Shoch D, Siikamäki JV, Smith P, Woodbury P, Zganjar C, Blackman A, Campari J, Conant RT, Delgado C, Elias P, Gopalakrishna T, Hamsik MR, Herrero M, Kiesecker J, Landis E, Laestadius L, Leavitt SM, Minnemeyer S, Polasky S, Potapov P, Putz FE, Sanderman J, Silvius M, Wollenberg E, Fargione J. 2017. Natural climate solutions. *Proc Natl Acad Sci U S A* **114**:11645–11650. doi:10.1073/pnas.1710465114
- Hayek MN, Harwatt H, Ripple WJ, Mueller ND. 2021. The carbon opportunity cost of animal-sourced food production on land. *Nature Sustainability* **4**:21–24. doi:10.1038/s41893-020-00603-4
- Houghton RA. 2003. 8.10 - The Contemporary Carbon Cycle In: Holland HD, Turekian KK, editors. *Treatise on Geochemistry*. Oxford: Pergamon. pp. 473–513. doi:10.1016/B0-08-043751-6/08168-8
- Howard P, Sylvan D. 2021. *Economic\_Consensus\_on\_Climate.pdf*. *Institute for Policy Integrity*.
- Hristov AN, Oh J, Firkins JL, Dijkstra J, Kebreab E, Waghorn G, Makkar HPS, Adesogan AT, Yang W, Lee C, Gerber PJ, Henderson B, Tricarico JM. 2013a. Special topics--Mitigation of methane and nitrous oxide emissions from animal operations: I. A review of enteric methane mitigation options. *J Anim Sci* **91**:5045–5069. doi:10.2527/jas.2013-6583
- Hristov AN, Ott T, Tricarico J, Rotz A, Waghorn G, Adesogan A, Dijkstra J, Montes F, Oh J, Kebreab E, Oosting SJ, Gerber PJ, Henderson B, Makkar HPS, Firkins JL. 2013b. Special topics--Mitigation of methane and nitrous oxide emissions from animal operations: III. A review of animal management mitigation options. *J Anim Sci* **91**:5095–5113. doi:10.2527/jas.2013-6585
- IPCC. 2018. Global Warming of 1.5°C. An IPCC Special Report on the impacts of global warming of 1.5°C above pre-industrial levels and related global greenhouse gas emission

- pathways, in the context of strengthening the global response to the threat of climate change, sustainable development, and efforts to eradicate poverty. IPCC.
- Lennox GD, Gardner TA, Thomson JR, Ferreira J, Berenguer E, Lees AC, Mac Nally R, Aragão LEOC, Ferraz SFB, Louzada J, Moura NG, Oliveira VHF, Pardini R, Solar RRC, Vaz-de Mello FZ, Vieira ICG, Barlow J. 2018. Second rate or a second chance? Assessing biomass and biodiversity recovery in regenerating Amazonian forests. *Glob Chang Biol* **24**:5680–5694. doi:10.1111/gcb.14443
- MacLeod MJ, Hasan MR, Robb DHF, Mamun-Ur-Rashid M. 2020. Quantifying greenhouse gas emissions from global aquaculture. *Sci Rep* **10**:11679. doi:10.1038/s41598-020-68231-8
- MacLeod MJ, Vellinga T, Opio C, Falcucci A, Tempio G, Henderson B, Makkar H, Mottet A, Robinson T, Steinfeld H, Gerber PJ. 2018. Invited review: A position on the Global Livestock Environmental Assessment Model (GLEAM). *Animal* **12**:383–397. doi:10.1017/S1751731117001847
- Maron M, Simmonds JS, Watson JEM. 2018. Bold nature retention targets are essential for the global environment agenda. *Nat Ecol Evol* **2**:1194–1195. doi:10.1038/s41559-018-0595-2
- Meinshausen M, Raper SCB, Wigley TML. 2011. Emulating coupled atmosphere-ocean and carbon cycle models with a simpler model, MAGICC6 – Part 1: Model description and calibration. *Atmos Chem Phys* **11**:1417–1456. doi:10.5194/acp-11-1417-2011
- Montes F, Meinen R, Dell C, Rotz A, Hristov AN, Oh J, Waghorn G, Gerber PJ, Henderson B, Makkar HPS, Dijkstra J. 2013. SPECIAL TOPICS — Mitigation of methane and nitrous oxide emissions from animal operations: II. A review of manure management mitigation options. *J Anim Sci* **91**:5070–5094. doi:10.2527/jas.2013-6584
- Morgenstern O, Hegglin MI, Rozanov E, O'Connor FM, Abraham NL, Akiyoshi H, Archibald AT, Bekki S, Butchart N, Chipperfield MP, Deushi M, Dhomse SS, Garcia RR, Hardiman SC, Horowitz LW, Jöckel P, Josse B, Kinnison D, Lin M, Mancini E, Manyin ME, Marchand M, Marécal V, Michou M, Oman LD, Pitari G, Plummer DA, Revell LE, Saint-Martin D, Schofield R, Stenke A, Stone K, Sudo K, Tanaka TY, Tilmes S, Yamashita Y, Yoshida K, Zeng G. 2017. Review of the global models used within phase 1 of the Chemistry–Climate Model Initiative (CCMI). *Geosci Model Dev* **10**:639–671. doi:10.5194/gmd-10-639-2017
- Moss RH, Edmonds JA, Hibbard KA, Manning MR, Rose SK, van Vuuren DP, Carter TR, Emori S, Kainuma M, Kram T, Meehl GA, Mitchell JFB, Nakicenovic N, Riahi K, Smith SJ, Stouffer RJ, Thomson AM, Weyant JP, Wilbanks TJ. 2010. The next generation of scenarios for climate change research and assessment. *Nature* **463**:747–756. doi:10.1038/nature08823
- Myhre G, Highwood EJ, Shine KP, Stordal F. 1998. New estimates of radiative forcing due to well mixed greenhouse gases. *Geophys Res Lett* **25**:2715–2718. doi:10.1029/98gl01908
- Myhre, G., Shindell D, Bréon F-M, Collins W, Fuglestedt J, Huang J, Koch D, Lamarque J-F, Lee D, Mendoza B, Nakajima T, Robock A, Stephens G, T Takemura And, G., Shindell D, Bréon F-M, Collins W, Fuglestedt J, Huang J, Koch D, Lamarque J-F, Lee D, Mendoza B, Nakajima T, Robock A, Stephens G, T Takemura And. 2013. Anthropogenic and Natural Radiative Forcing In: Stocker TF, Qin D, Plattner G-K, Tignor M, Allen SK, Boschung J, Nauels A, Xia Y, V Bex And P, editors. Climate Change 2013: The Physical Science Basis. Contribution of Working Group I to the Fifth Assessment Report of the Intergovernmental Panel on Climate Change.
- Newbold T, Hudson LN, Hill SLL, Contu S, Lysenko I, Senior RA, Börger L, Bennett DJ, Choimes A, Collen B, Day J, De Palma A, Díaz S, Echeverria-Londoño S, Edgar MJ, Feldman A, Garon M, Harrison MLK, Alhousseini T, Ingram DJ, Itescu Y, Kattge J, Kemp V, Kirkpatrick L, Kleyer M, Correia DLP, Martin CD, Meiri S, Novosolov M, Pan Y, Phillips HRP, Purves DW, Robinson A, Simpson J, Tuck SL, Weiher E, White HJ, Ewers RM, Mace GM, Scharlemann JPW, Purvis A. 2015. Global effects of land use on local terrestrial biodiversity. *Nature* **520**:45–50. doi:10.1038/nature14324
- N'Guessan AE, N'dja JK, Yao ON, Amani BHK, Gouli RGZ, Piponiot C, Zo-Bi IC, Hérault B.

2019. Drivers of biomass recovery in a secondary forested landscape of West Africa. *For Ecol Manage* **433**:325–331. doi:10.1016/j.foreco.2018.11.021
- Oliver TH, Isaac NJB, August TA, Woodcock BA, Roy DB, Bullock JM. 2015. Declining resilience of ecosystem functions under biodiversity loss. *Nat Commun* **6**:10122. doi:10.1038/ncomms10122
- Parker RWR, Blanchard JL, Gardner C, Green BS, Hartmann K, Tyedmers PH, Watson RA. 2018. Fuel use and greenhouse gas emissions of world fisheries. *Nat Clim Chang* **8**:333–337. doi:10.1038/s41558-018-0117-x
- Poore J, Nemecek T. 2018. Reducing food's environmental impacts through producers and consumers. *Science* **360**:987–992. doi:10.1126/science.aaq0216
- Poorter L, Bongers F, Aide TM, Almeyda Zambrano AM, Balvanera P, Becknell JM, Boukili V, Brancalion PHS, Broadbent EN, Chazdon RL, Craven D, de Almeida-Cortez JS, Cabral GAL, de Jong BHJ, Denslow JS, Dent DH, DeWalt SJ, Dupuy JM, Durán SM, Espírito-Santo MM, Fandino MC, César RG, Hall JS, Hernandez-Stefanoni JL, Jakovac CC, Junqueira AB, Kennard D, Letcher SG, Licona J-C, Lohbeck M, Marín-Spiotta E, Martínez-Ramos M, Massoca P, Meave JA, Mesquita R, Mora F, Muñoz R, Muscarella R, Nunes YRF, Ochoa-Gaona S, de Oliveira AA, Orihuela-Belmonte E, Peña-Claros M, Pérez-García EA, Piotta D, Powers JS, Rodríguez-Velázquez J, Romero-Pérez IE, Ruíz J, Saldarriaga JG, Sanchez-Azofeifa A, Schwartz NB, Steininger MK, Swenson NG, Toledo M, Uriarte M, van Breugel M, van der Wal H, Veloso MDM, Vester HFM, Vicentini A, Vieira ICG, Bentson TV, Williamson GB, Rozendaal DMA. 2016. Biomass resilience of Neotropical secondary forests. *Nature* **530**:211–214. doi:10.1038/nature16512
- Prather MJ, Hsu J, DeLuca NM, Jackman CH, Oman LD, Douglass AR, Fleming EL, Strahan SE, Steenrod SD, Søvdø OA, Isaksen ISA, Froidevaux L, Funke B. 2015. Measuring and modeling the lifetime of nitrous oxide including its variability. *J Geophys Res D: Atmos* **120**:5693–5705. doi:10.1002/2015JD023267
- Ramaswamy V, Boucher O, Haigh J, Hauglustaine D, Haywood J, Myhre G, Nakajima T, Shi GY, Solomon S. 2001. Radiative Forcing of Climate Change. *Climate Change 2001: The Scientific Basis*. PAO.
- Riahi K, van Vuuren DP, Kriegler E, Edmonds J, O'Neill BC, Fujimori S, Bauer N, Calvin K, Dellink R, Fricko O, Lutz W, Popp A, Cuaresma JC, Kc S, Leimbach M, Jiang L, Kram T, Rao S, Emmerling J, Ebi K, Hasegawa T, Havlik P, Humpenöder F, Da Silva LA, Smith S, Stehfest E, Bosetti V, Eom J, Gernaat D, Masui T, Rogelj J, Strefler J, Drouet L, Krey V, Luderer G, Harmsen M, Takahashi K, Baumstark L, Doelman JC, Kainuma M, Klimont Z, Marangoni G, Lotze-Campen H, Obersteiner M, Tabeau A, Tavoni M. 2017. The Shared Socioeconomic Pathways and their energy, land use, and greenhouse gas emissions implications: An overview. *Glob Environ Change* **42**:153–168. doi:10.1016/j.gloenvcha.2016.05.009
- Sala E, Mayorga J, Bradley D, Cabral RB, Atwood TB, Auber A, Cheung W, Costello C, Ferretti F, Friedlander AM, Gaines SD, Garilao C, Goodell W, Halpern BS, Hinson A, Kaschner K, Kesner-Reyes K, Leprieur F, McGowan J, Morgan LE, Mouillot D, Palacios-Abrantes J, Possingham HP, Rechberger KD, Worm B, Lubchenco J. 2021. Protecting the global ocean for biodiversity, food and climate. *Nature*. doi:10.1038/s41586-021-03371-z
- Satija A, Bhupathiraju SN, Spiegelman D, Chiuve SE, Manson JE, Willett W, Rexrode KM, Rimm EB, Hu FB. 2017. Healthful and Unhealthful Plant-Based Diets and the Risk of Coronary Heart Disease in U.S. Adults. *J Am Coll Cardiol* **70**:411–422. doi:10.1016/j.jacc.2017.05.047
- Saunio M, Stavert AR, Poulter B, Bousquet P, Canadell JG, Jackson RB, Raymond PA, Dlugokencky EJ, Houweling S, Patra PK, Ciais P, Arora VK, Bastviken D, Bergamaschi P, Blake DR, Brailsford G, Bruhwiler L, Carlson KM, Carrol M, Castaldi S, Chandra N, Crevoisier C, Crill PM, Covey K, Curry CL, Etiope G, Frankenberg C, Gedney N, Hegglin

- MI, Höglund-Isaksson L, Hugelius G, Ishizawa M, Ito A, Janssens-Maenhout G, Jensen KM, Joos F, Kleinen T, Krummel PB, Langenfelds RL, Laruelle GG, Liu L, Machida T, Maksyutov S, McDonald KC, McNorton J, Miller PA, Melton JR, Morino I, Müller J, Murguia-Flores F, Naik V, Niwa Y, Noce S, O'Doherty S, Parker RJ, Peng C, Peng S, Peters GP, Prigent C, Prinn R, Ramonet M, Regnier P, Riley WJ, Rosentreter JA, Segers A, Simpson IJ, Shi H, Smith SJ, Steele LP, Thornton BF, Tian H, Tohjima Y, Tubiello FN, Tsuruta A, Viovy N, Voulgarakis A, Weber TS, van Weele M, van der Werf GR, Weiss RF, Worthy D, Wunch D, Yin Y, Yoshida Y, Zhang W, Zhang Z, Zhao Y, Zheng B, Zhu Q, Zhu Q, Zhuang Q. 2020. The global methane budget 2000–2017. *Earth Syst Sci Data* **12**:1561–1623. doi:10.5194/essd-12-1561-2020
- Shine KP. 2000. Radiative Forcing of Climate Change. *Space Sci Rev* **94**:363–373. doi:10.1023/A:1026752230256
- Springmann M, Godfray HCJ, Rayner M, Scarborough P. 2016. Analysis and valuation of the health and climate change cobenefits of dietary change. *Proc Natl Acad Sci U S A* **113**:4146–4151. doi:10.1073/pnas.1523119113
- Springmann M, Wiebe K, Mason-D'Croz D, Sulser TB, Rayner M, Scarborough P. 2018. Health and nutritional aspects of sustainable diet strategies and their association with environmental impacts: a global modelling analysis with country-level detail. *Lancet Planet Health* **2**:e451–e461. doi:10.1016/S2542-5196(18)30206-7
- Stehfest E, van Zeist W-J, Valin H, Havlik P, Popp A, Kyle P, Tabeau A, Mason-D'Croz D, Hasegawa T, Bodirsky BL, Calvin K, Doelman JC, Fujimori S, Humpenöder F, Lotze-Campen H, van Meijl H, Wiebe K. 2019. Key determinants of global land-use projections. *Nat Commun* **10**:2166. doi:10.1038/s41467-019-09945-w
- Steinfeld H, Gerber P, Wassenaar T, Castel V, Rosales M, de Haan C. 2006. Livestock's Long Shadow. *Food and Agriculture Organization*. <http://www.fao.org/docrep/010/a0701e/a0701e.pdf>
- Strassburg BBN, Iribarrem A, Beyer HL, Cordeiro CL, Crouzeilles R, Jakovac CC, Braga Junqueira A, Lacerda E, Latawiec AE, Balmford A, Brooks TM, Butchart SHM, Chazdon RL, Erb K-H, Brancalion P, Buchanan G, Cooper D, Díaz S, Donald PF, Kapos V, Leclère D, Miles L, Obersteiner M, Plutzer C, de M Scaramuzza CA, Scarano FR, Visconti P. 2020. Global priority areas for ecosystem restoration. *Nature* **586**:724–729. doi:10.1038/s41586-020-2784-9
- Tilman D, Clark M. 2014. Global diets link environmental sustainability and human health. *Nature* **515**:518–522. doi:10.1038/nature13959
- van Vuuren DP, Edmonds J, Kainuma M, Riahi K, Thomson A, Hibbard K, Hurtt GC, Kram T, Krey V, Lamarque J-F, Masui T, Meinshausen M, Nakicenovic N, Smith SJ, Rose SK. 2011. The representative concentration pathways: an overview. *Clim Change* **109**:5. doi:10.1007/s10584-011-0148-z
- Walker JCG. 1977. Evolution of the atmosphere. New York: Macmillan.
- Willett W, Rockström J, Loken B, Springmann M, Lang T, Vermeulen S, Garnett T, Tilman D, DeClerck F, Wood A, Jonell M, Clark M, Gordon LJ, Fanzo J, Hawkes C, Zurayk R, Rivera JA, De Vries W, Majele Sibanda L, Afshin A, Chaudhary A, Herrero M, Agustina R, Branca F, Lartey A, Fan S, Crona B, Fox E, Bignet V, Troell M, Lindahl T, Singh S, Cornell SE, Srinath Reddy K, Narain S, Nishtar S, Murray CJL. 2019. Food in the Anthropocene: the EAT-Lancet Commission on healthy diets from sustainable food systems. *Lancet* **393**:447–492. doi:10.1016/S0140-6736(18)31788-4
- World Wildlife Fund. 2020. Living Planet Report 2020.

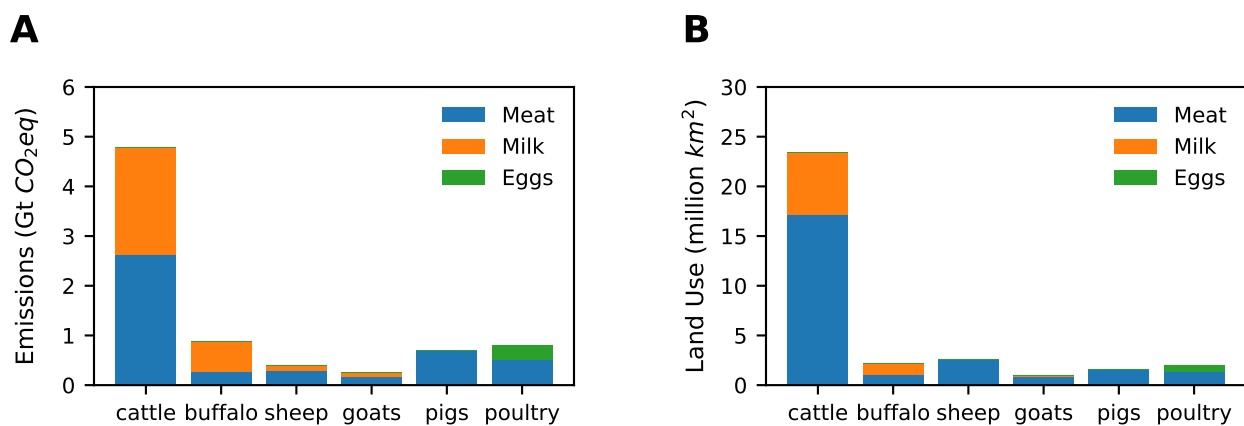

Figure 1. Global emissions and land use footprints of animal agriculture.

Total CO<sub>2</sub> equivalent emissions (A) assembled from species, product and country-specific production data from FAOSTAT for 2019 and species, product, region and greenhouse-gas specific emissions data from GLEAM (MacLeod et al., 2018), using CO<sub>2</sub> equivalents of 34 for CH<sub>4</sub> and 298 for N<sub>2</sub>O. Land use (B) assembled from species, product and country-specific production data from FAOSTAT for 2019 and species and product specific land use data from (Poore and Nemecek, 2018).

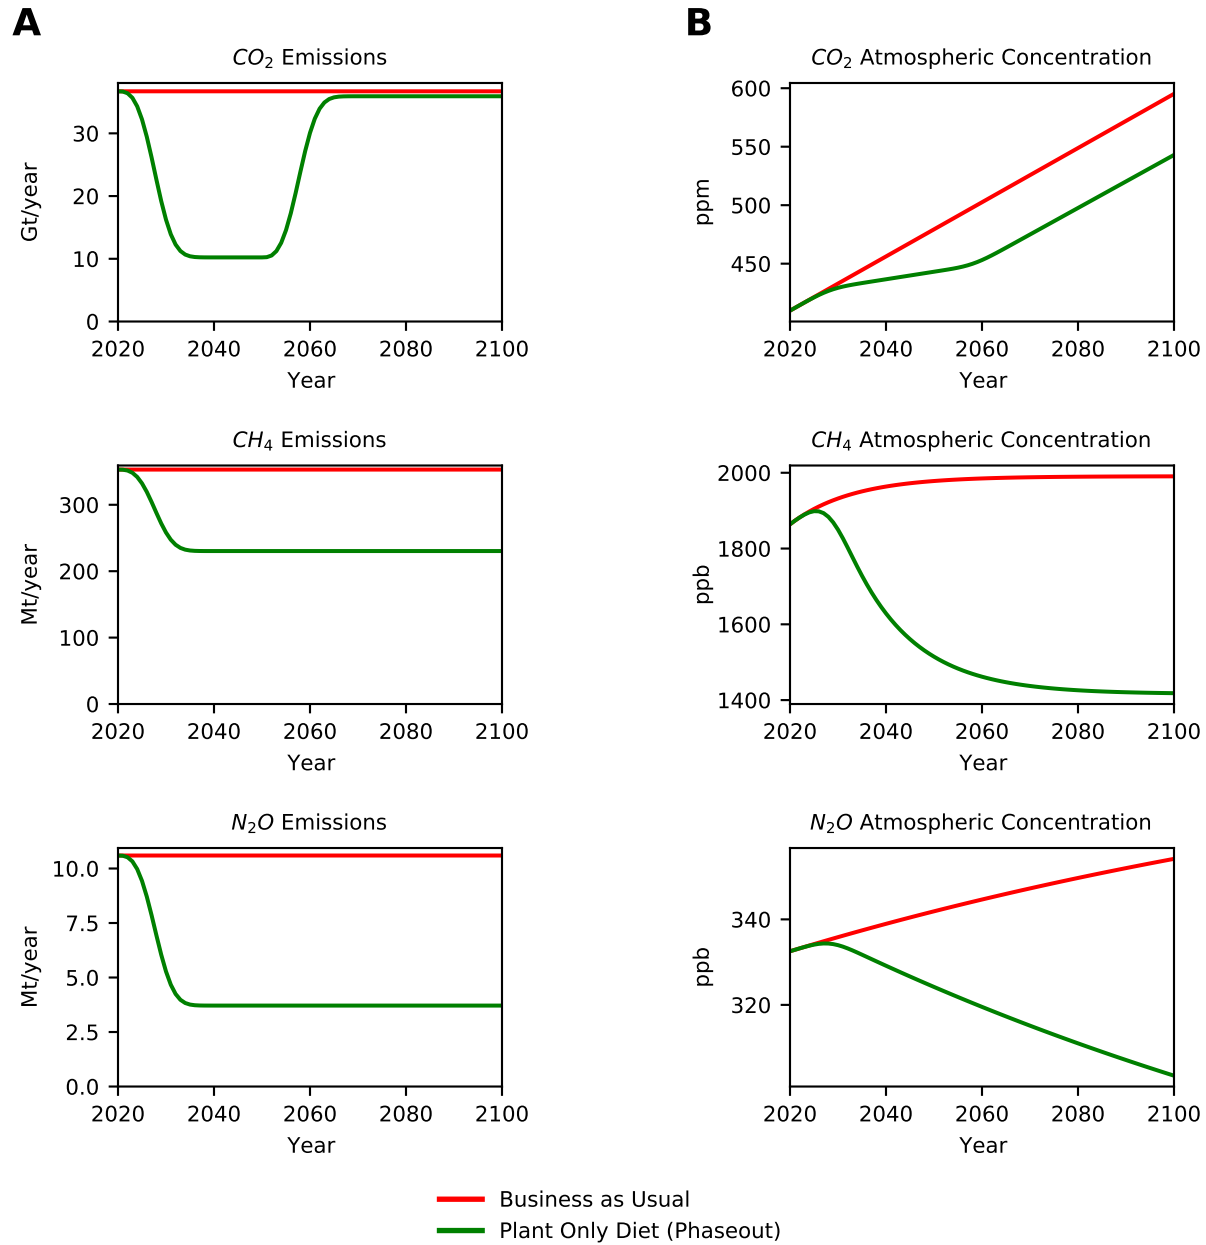

Figure 2. Impact of 15 year phaseout of animal agriculture on atmospheric greenhouse gas levels.

(A) Projected annual emissions of CO<sub>2</sub>, CH<sub>4</sub> and N<sub>2</sub>O for Business as Usual (red) and Plant Only Diet (green) assuming a 15 year transition to new diet. (B) Projected atmospheric concentrations of CO<sub>2</sub>, CH<sub>4</sub> and N<sub>2</sub>O under each emission scenario.

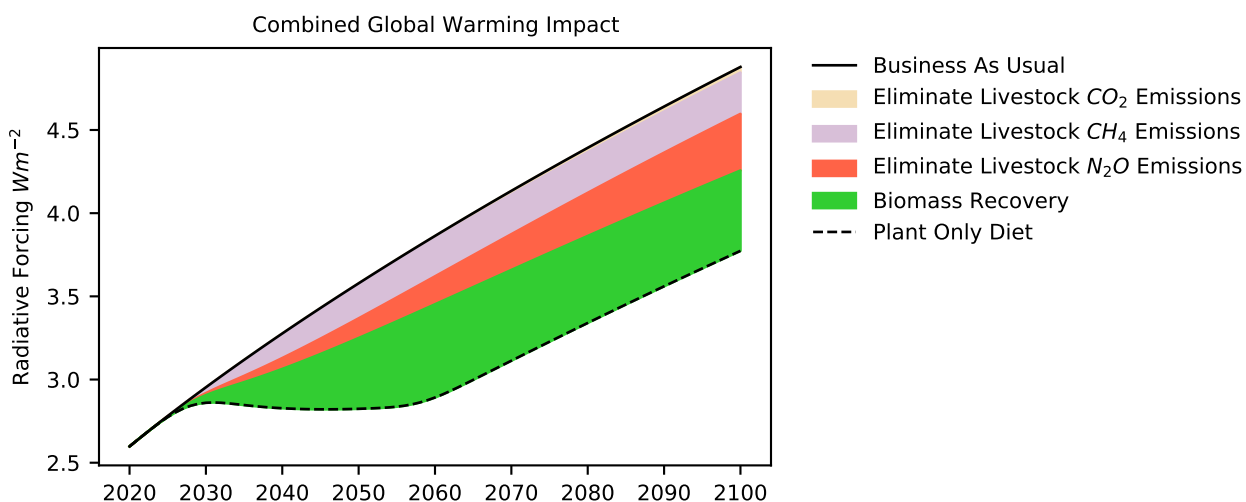

Figure 3. Phaseout of animal agriculture reduces global warming impact of atmosphere.

Effect of eliminating emissions linked to animal agriculture and of biomass recovery on land currently used in animal agriculture on Radiative Forcing (RF), a measure of the instantaneous warming potential of the atmosphere. RF values computed from atmospheric concentrations in by formula of (Myhre et al., 1998; Ramaswamy et al., 2001) as modified in MAGICC6 (Meinshausen et al., 2011) with adjustment for gasses other than  $CO_2$ ,  $CH_4$  and  $N_2O$  as described in text.



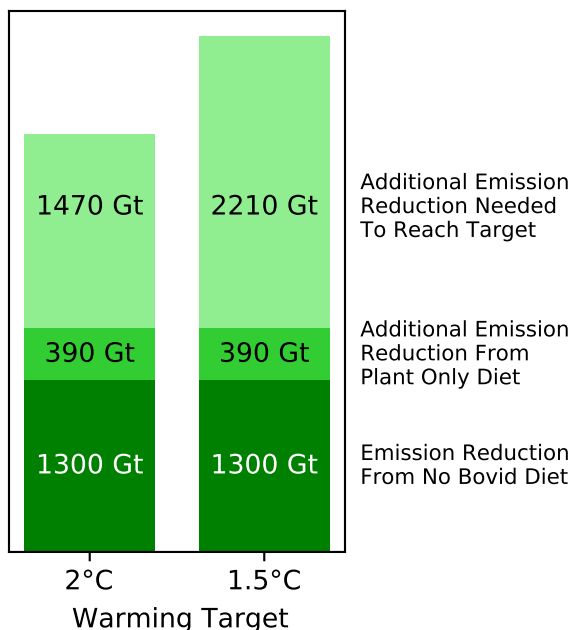

Figure 4. Impact of dietary transitions in curtailing global warming.

Using projected  $CH_4$  and  $N_2O$  levels in 2100 under business as usual diet as a baseline for RF calculation, we computed the  $CO_2$  reductions necessary to reduce RF from the business as usual diet level of  $RF=4.88$  to the bovid-free diet level of  $RF=4.05$  (1300 Gt  $CO_2$ ), the plant-only diet level of  $RF=3.77$  (1690 Gt  $CO_2$ ), the 2.0°C global warming target of  $RF=2.6$  (3160 Gt  $CO_2$ ) and the 1.5°C global warming target of  $RF=1.9$  (3900 Gt  $CO_2$ ). For this analysis we used a corrected RF that accounts for the absence of other gases in our calculation by training a linear regression model on published MAGICC6 output to estimate from  $CO_2$ ,  $CH_4$  and  $N_2O$  levels the residual RF impact of other gases.

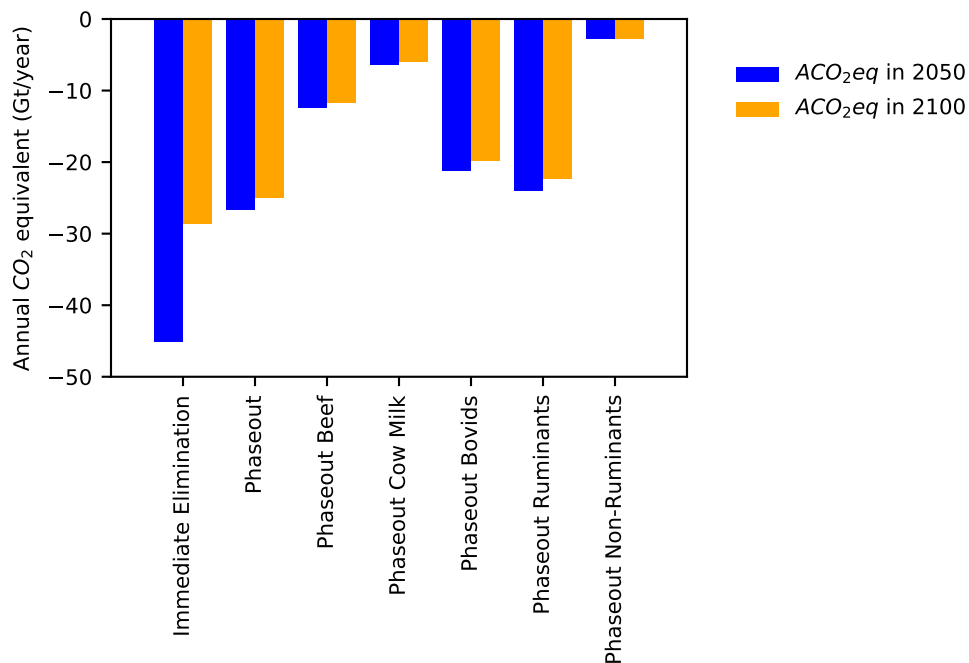

Figure 5. Annual CO<sub>2</sub> equivalents (aCO<sub>2</sub>eq) of dietary scenarios

For each scenario we calculated the sustained reduction in annual CO<sub>2</sub> emissions starting in 2021 that would produce the same cumulative radiative forcing as the scenario in the period from from 2021 to 2050 (blue bars), or from 2021 to 2100 (orange bars).

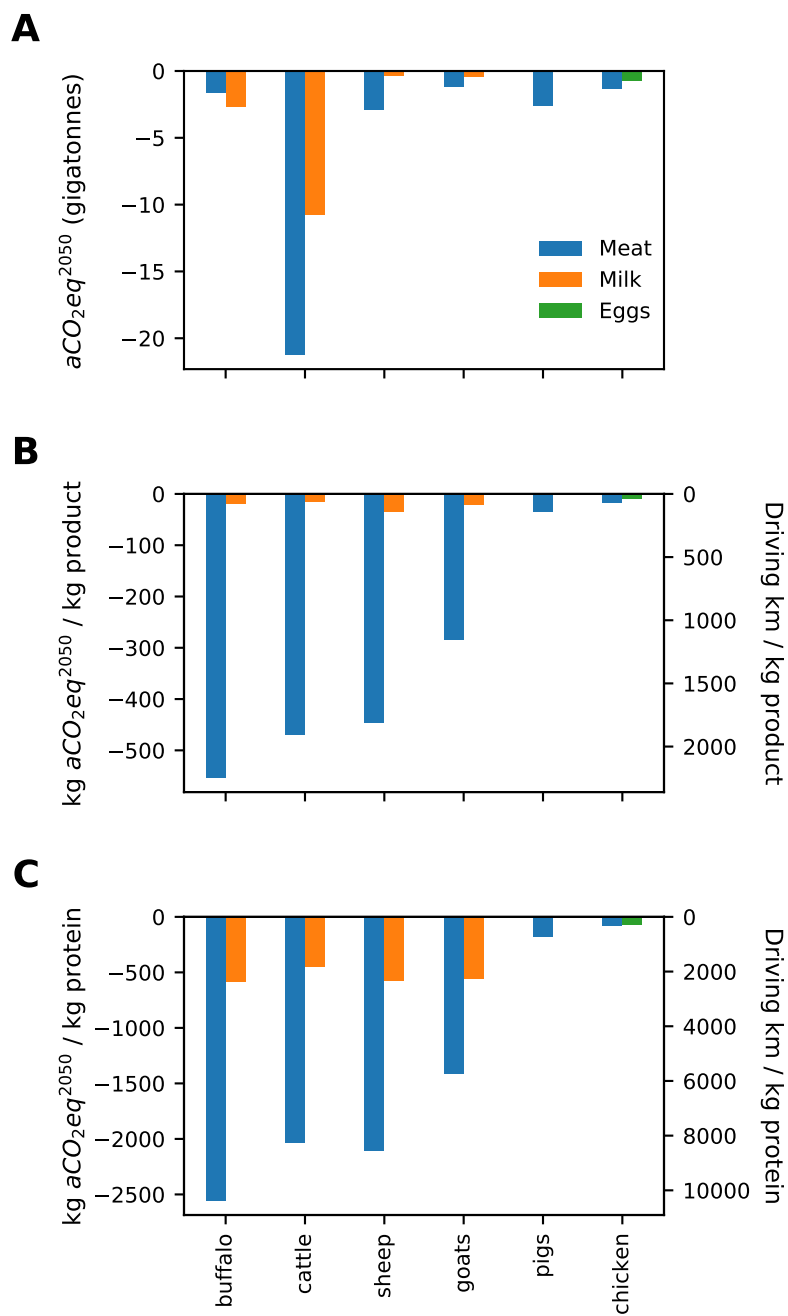

Figure 6. Emission equivalents of livestock products through 2050.

We calculated the (A) total annualized CO<sub>2</sub> equivalents through 2050,  $aCO_2eq^{2050}$ , for all tracked animal products, and the  $aCO_2eq^{2050}$  per unit production (B) or per unit protein (C). For (B) and (C) we also convert the values to driving equivalents, assuming cars that get 10.6 km per liter of gas (the average of new cars in the United States).

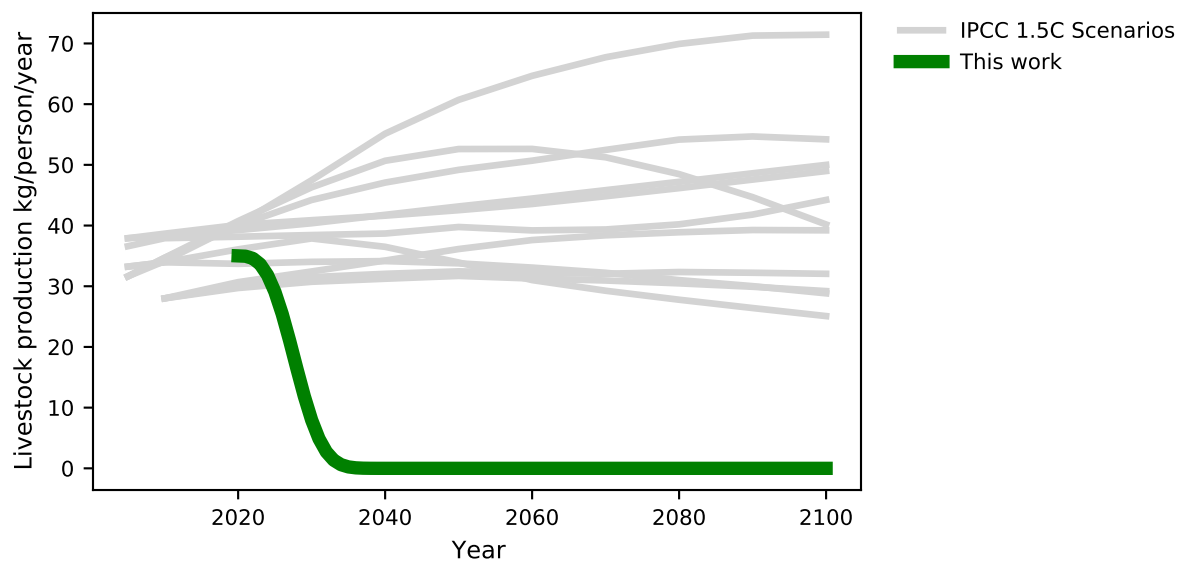

Figure 7. Projected per capita livestock production in SSP/IAM RF 1.9 scenarios.

We downloaded data for the Shared Socioeconomic Pathways (SSPs) (Riahi et al., 2017) from the SSP database (Version 2.0; last updated December 2018), and plot here the inferred per capita livestock production for scenarios meant to reach an RF target of 1.9 in 2100. While there is widespread acknowledgement of the impact that ongoing animal agriculture has on the climate, it is notable that most of these scenarios, which represent the most aggressive proposed mitigation strategies in this modeling framework, anticipate an increase in per capita livestock consumption, and none anticipate any significant reduction below current levels, in contrast to the complete elimination we propose here.

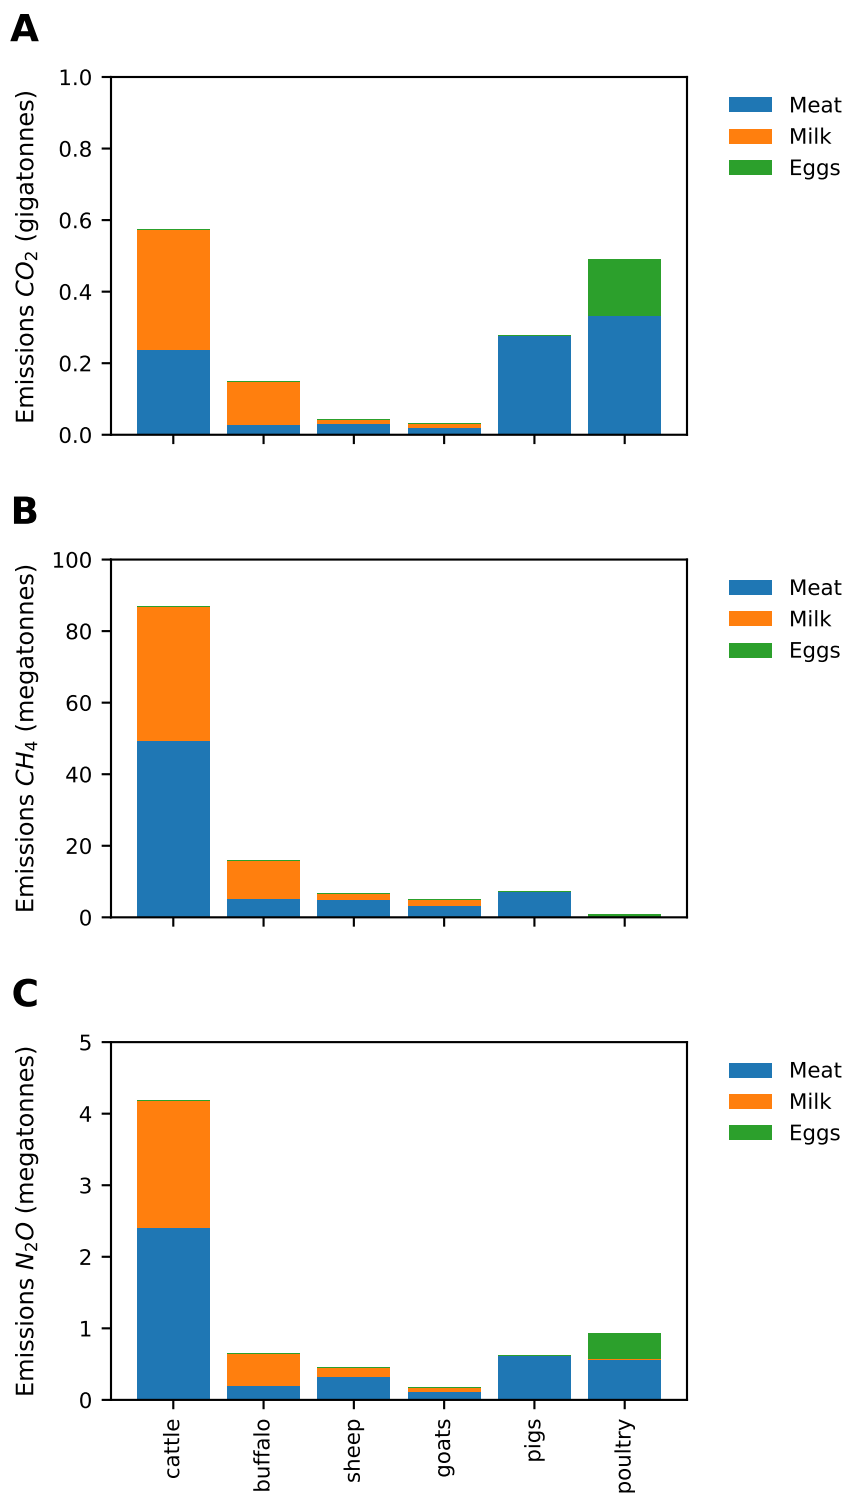

Figure 1-S1. Gas-specific emission footprints of animal agriculture.

Assembled from species, product and country-specific production data from FAOSTAT for 2018 and species, product, region and greenhouse gas-specific emissions data from GLEAM (MacLeod et al., 2018).

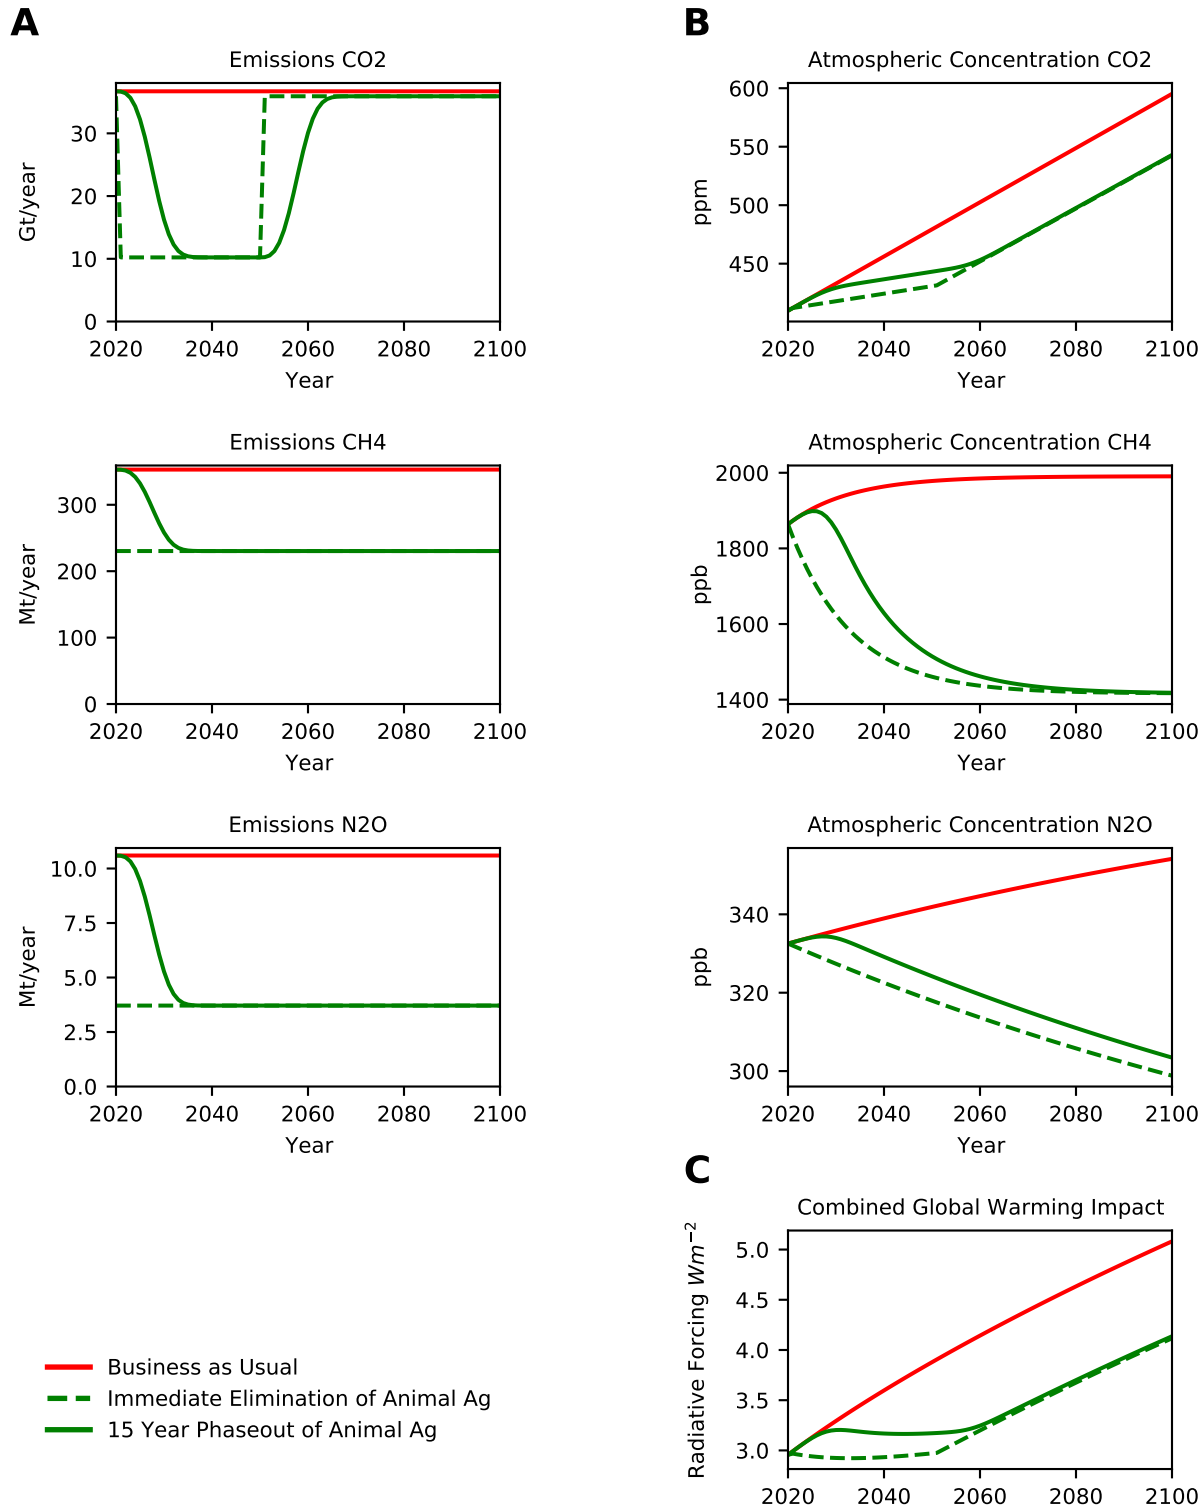

Figure 2-S1. Phaseout compared to Elimination.

(A) Projected annual emissions of  $CO_2$ ,  $CH_4$  and  $N_2O$  for shown scenarios. (B) Projected atmospheric concentrations of  $CO_2$ ,  $CH_4$  and  $N_2O$  under each emission scenario. (C) Radiative Forcing (RF) inferred from atmospheric concentrations in (B) by formula of (Myhre et al., 1998; Ramaswamy et al., 2001) as modified in MAGICC6 (Meinshausen et al., 2011).

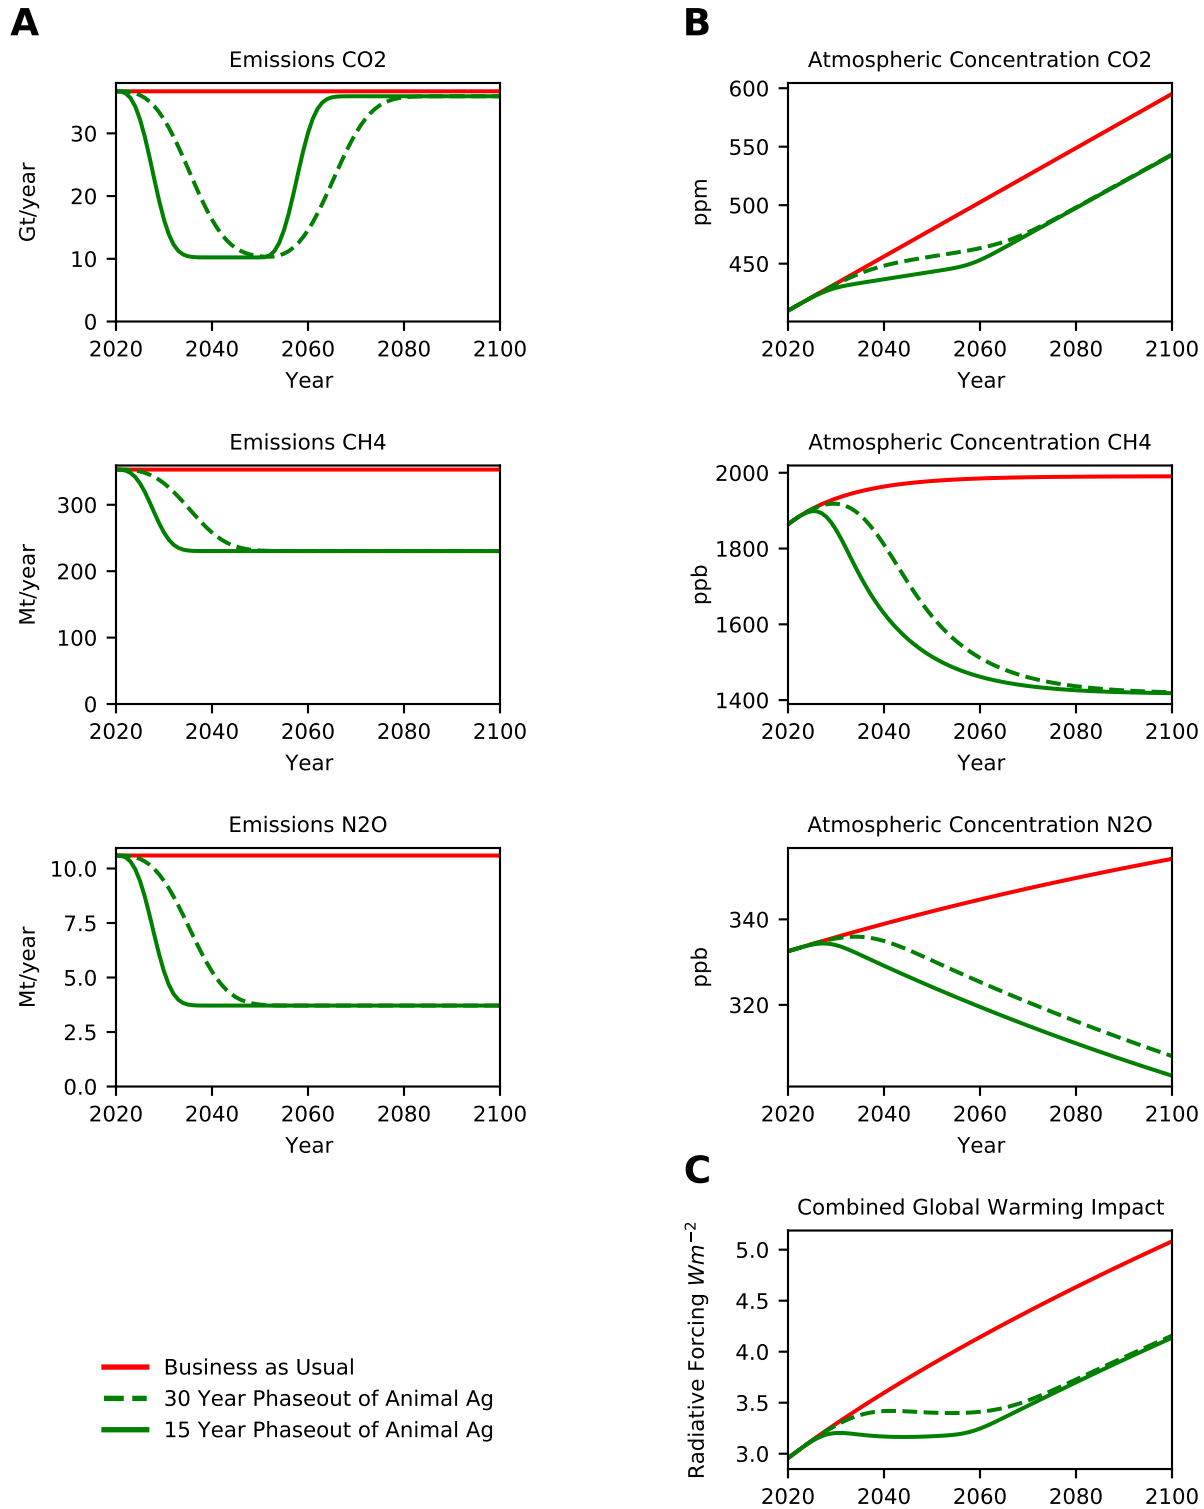

Figure 2-S2. Effects of Slower Phaseout.

(A) Projected annual emissions of  $CO_2$ ,  $CH_4$  and  $N_2O$  for shown scenarios. (B) Projected atmospheric concentrations of  $CO_2$ ,  $CH_4$  and  $N_2O$  under each emission scenario. (C) Radiative Forcing (RF) inferred from atmospheric concentrations in (B) by formula of (Myhre et al., 1998; Ramaswamy et al., 2001) as modified in MAGICC6 (Meinshausen et al., 2011).

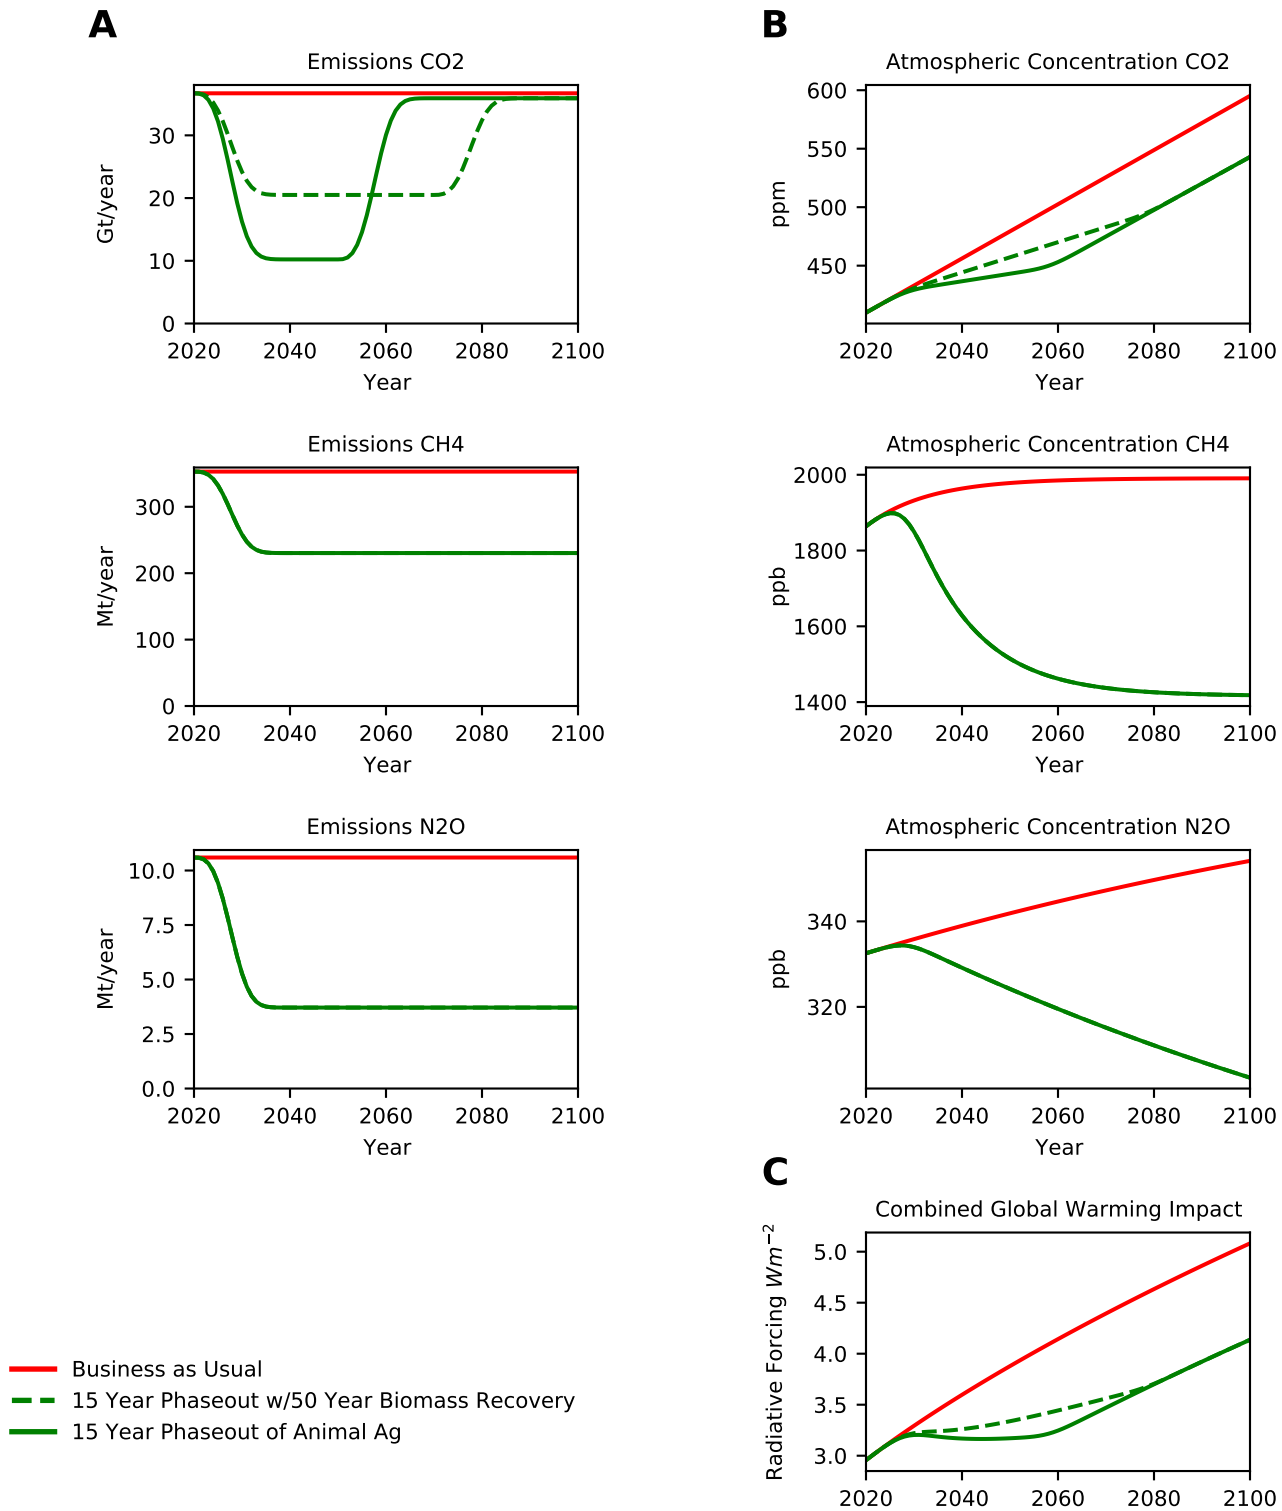

Figure 2-S3. Effects of Slower Biomass Recovery.

(A) Projected annual emissions of  $CO_2$ ,  $CH_4$  and  $N_2O$  for shown scenarios. (B) Projected atmospheric concentrations of  $CO_2$ ,  $CH_4$  and  $N_2O$  under each emission scenario. (C) Radiative Forcing (RF) inferred from atmospheric concentrations in (B) by formula of (Myhre et al., 1998; Ramaswamy et al., 2001) as modified in MAGICC6 (Meinshausen et al., 2011).



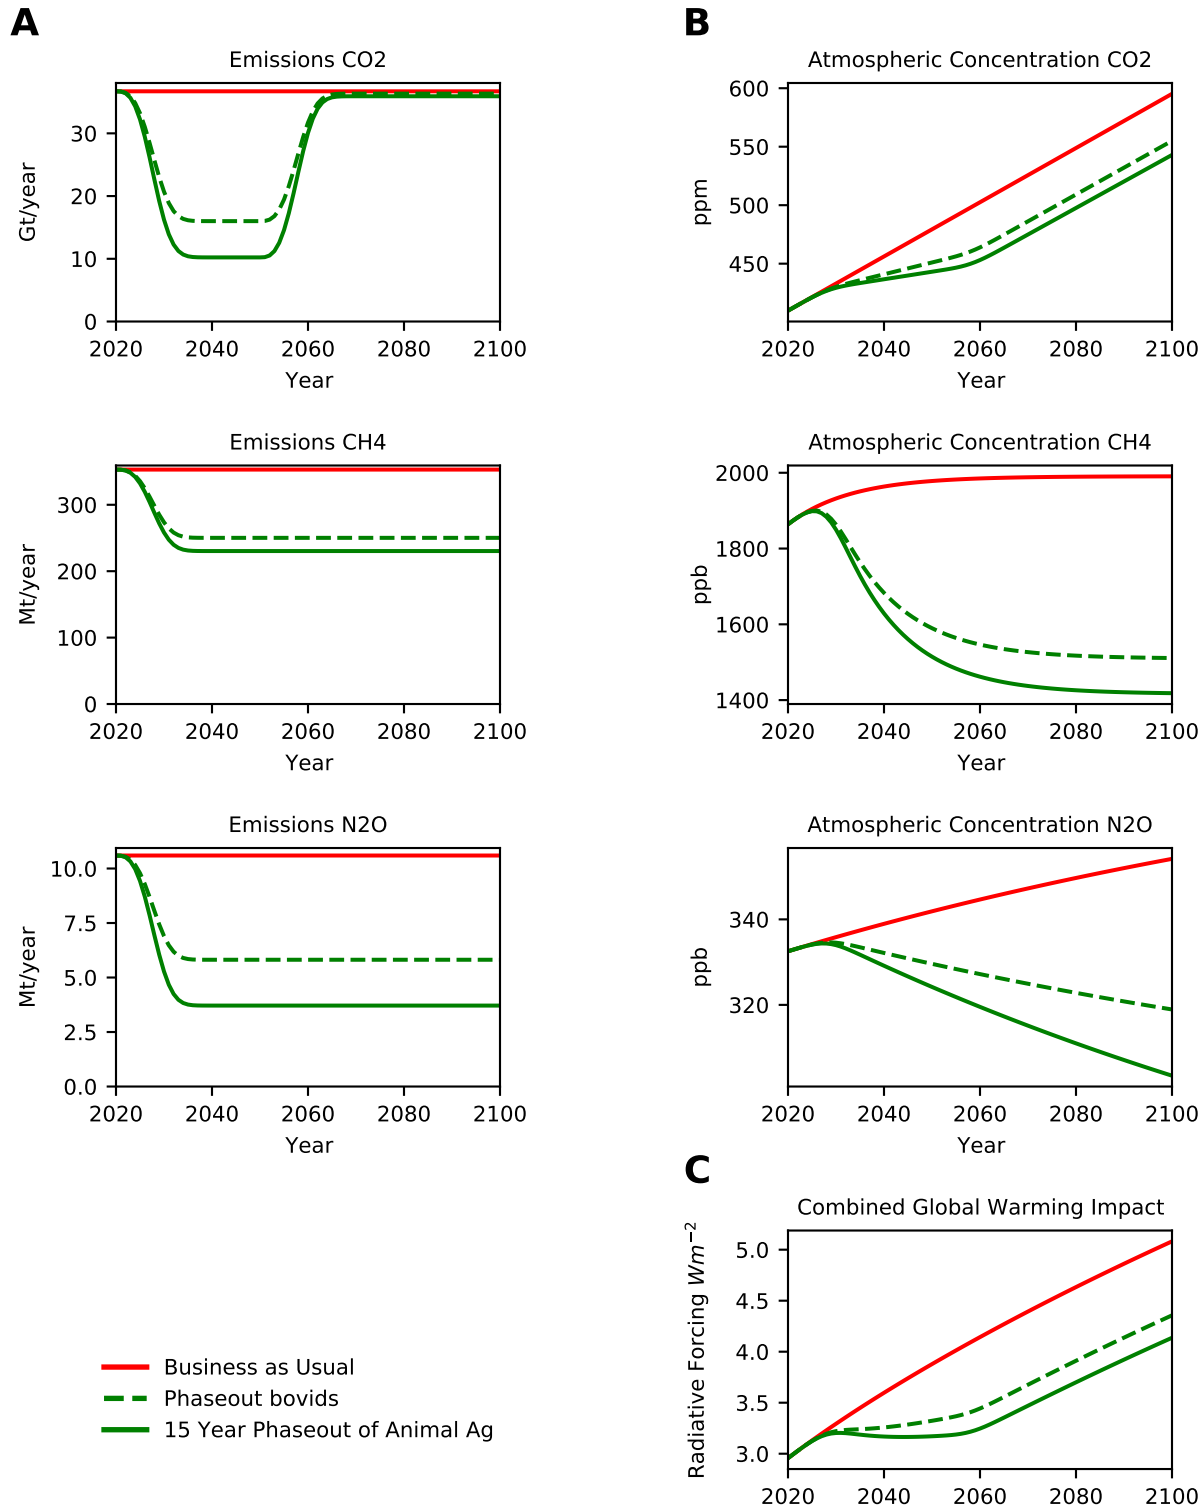

Figure 2-S4. Effects of Eliminating Bovids.

(A) Projected annual emissions of CO<sub>2</sub>, CH<sub>4</sub> and N<sub>2</sub>O for shown scenarios. (B) Projected atmospheric concentrations of CO<sub>2</sub>, CH<sub>4</sub> and N<sub>2</sub>O under each emission scenario. (C) Radiative Forcing (RF) inferred from atmospheric concentrations in (B) by formula of (Myhre et al., 1998; Ramaswamy et al., 2001) as modified in MAGICC6 (Meinshausen et al., 2011).

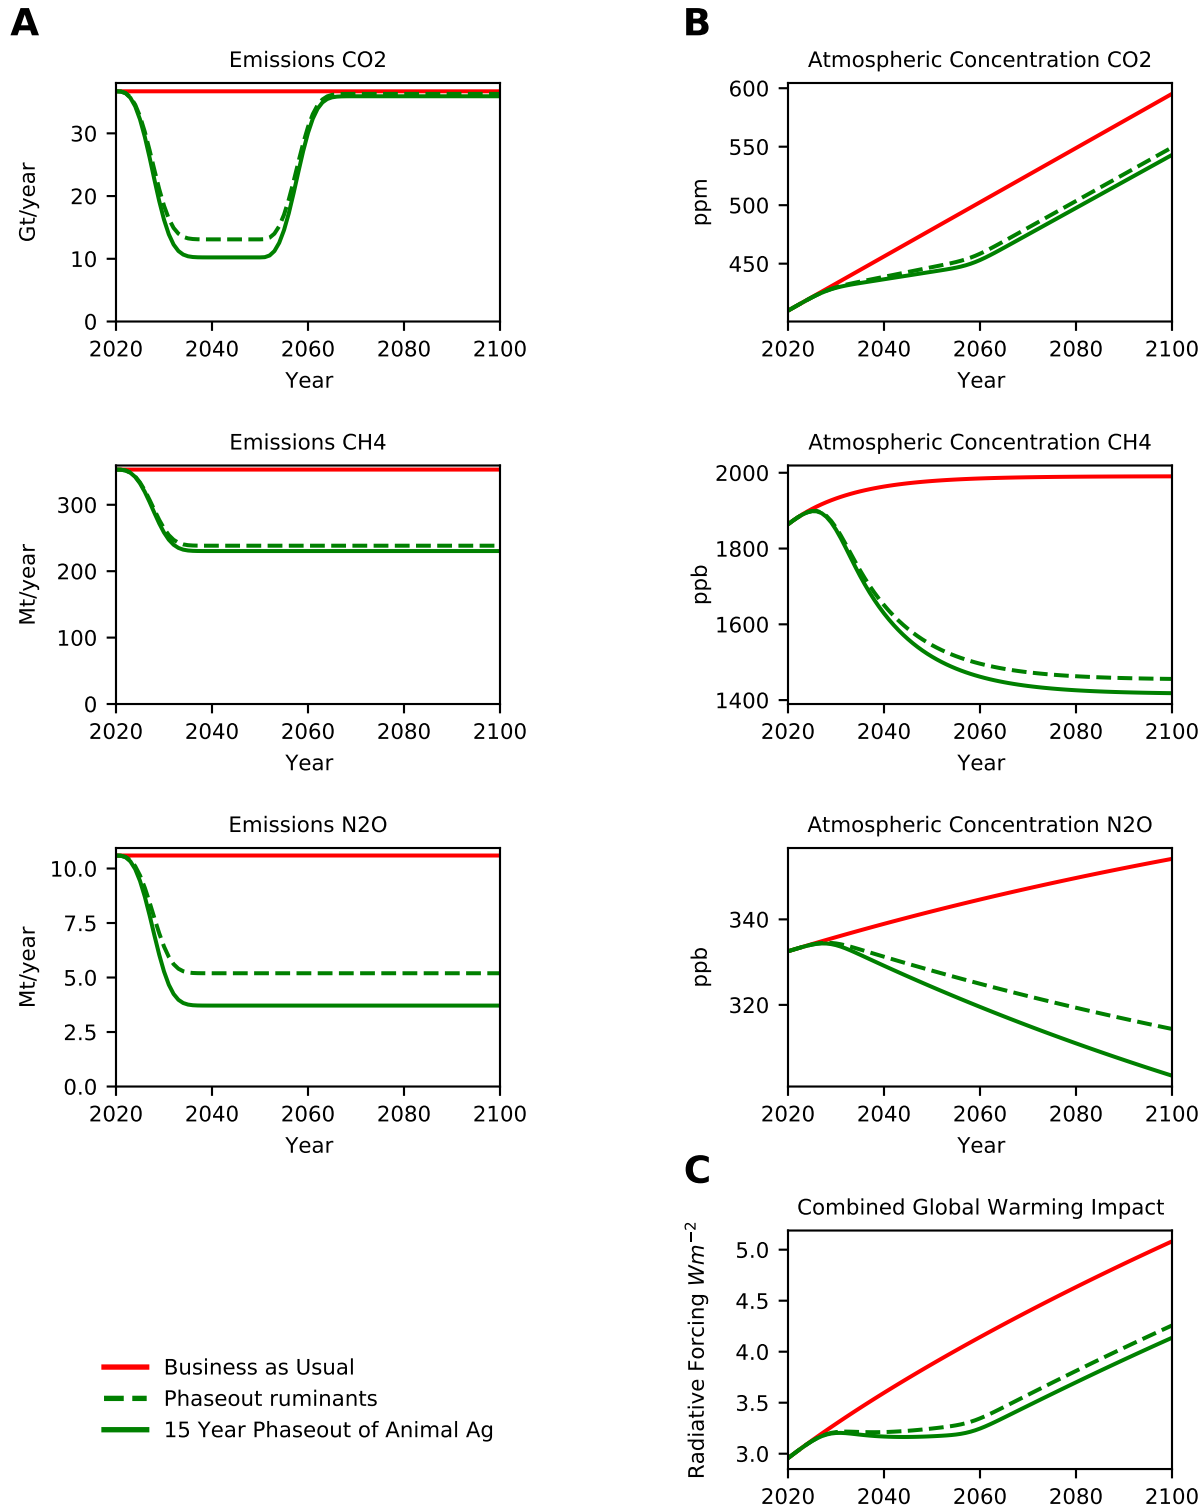

Figure 2-S5. Effects of Eliminating Ruminants.

(A) Projected annual emissions of  $CO_2$ ,  $CH_4$  and  $N_2O$  for shown scenarios. (B) Projected atmospheric concentrations of  $CO_2$ ,  $CH_4$  and  $N_2O$  under each emission scenario. (C) Radiative Forcing (RF) inferred from atmospheric concentrations in (B) by formula of (Myhre et al., 1998; Ramaswamy et al., 2001) as modified in MAGICC6 (Meinshausen et al., 2011).

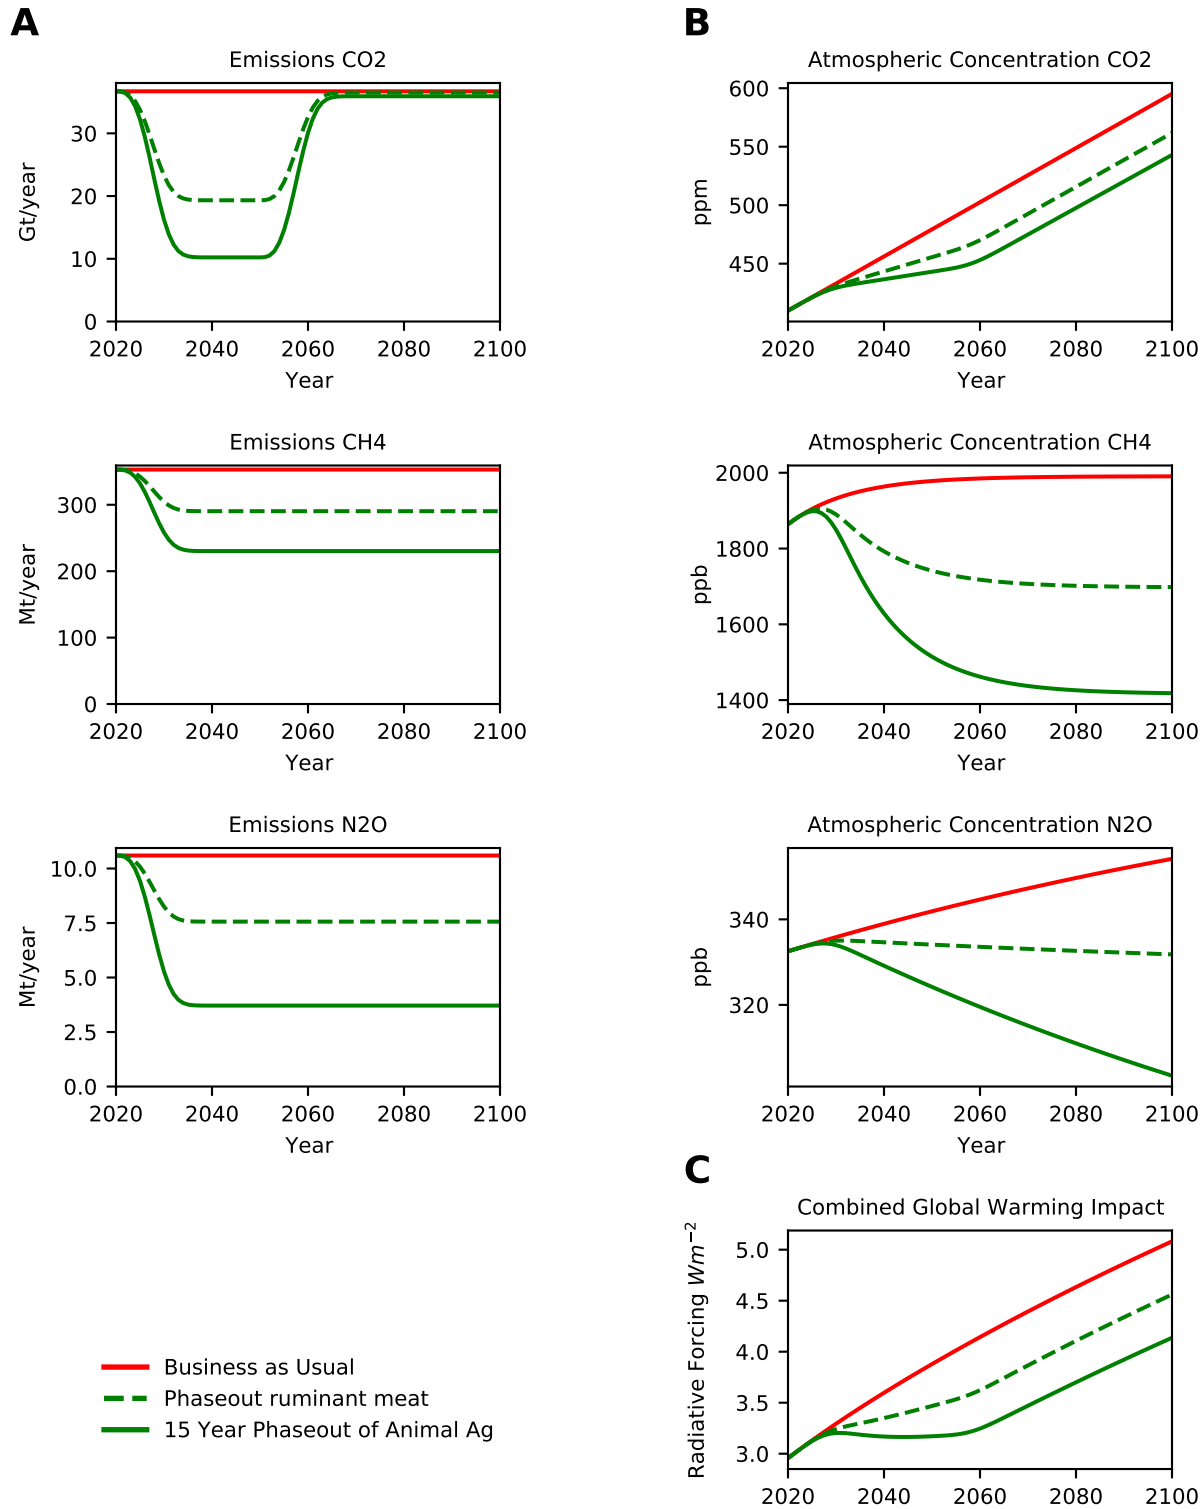

Figure 2-S6. Effects of Eliminating Ruminant Meat.

(A) Projected annual emissions of CO<sub>2</sub>, CH<sub>4</sub> and N<sub>2</sub>O for shown scenarios. (B) Projected atmospheric concentrations of CO<sub>2</sub>, CH<sub>4</sub> and N<sub>2</sub>O under each emission scenario. (C) Radiative Forcing (RF) inferred from atmospheric concentrations in (B) by formula of (Myhre et al., 1998; Ramaswamy et al., 2001) as modified in MAGICC6 (Meinshausen et al., 2011).

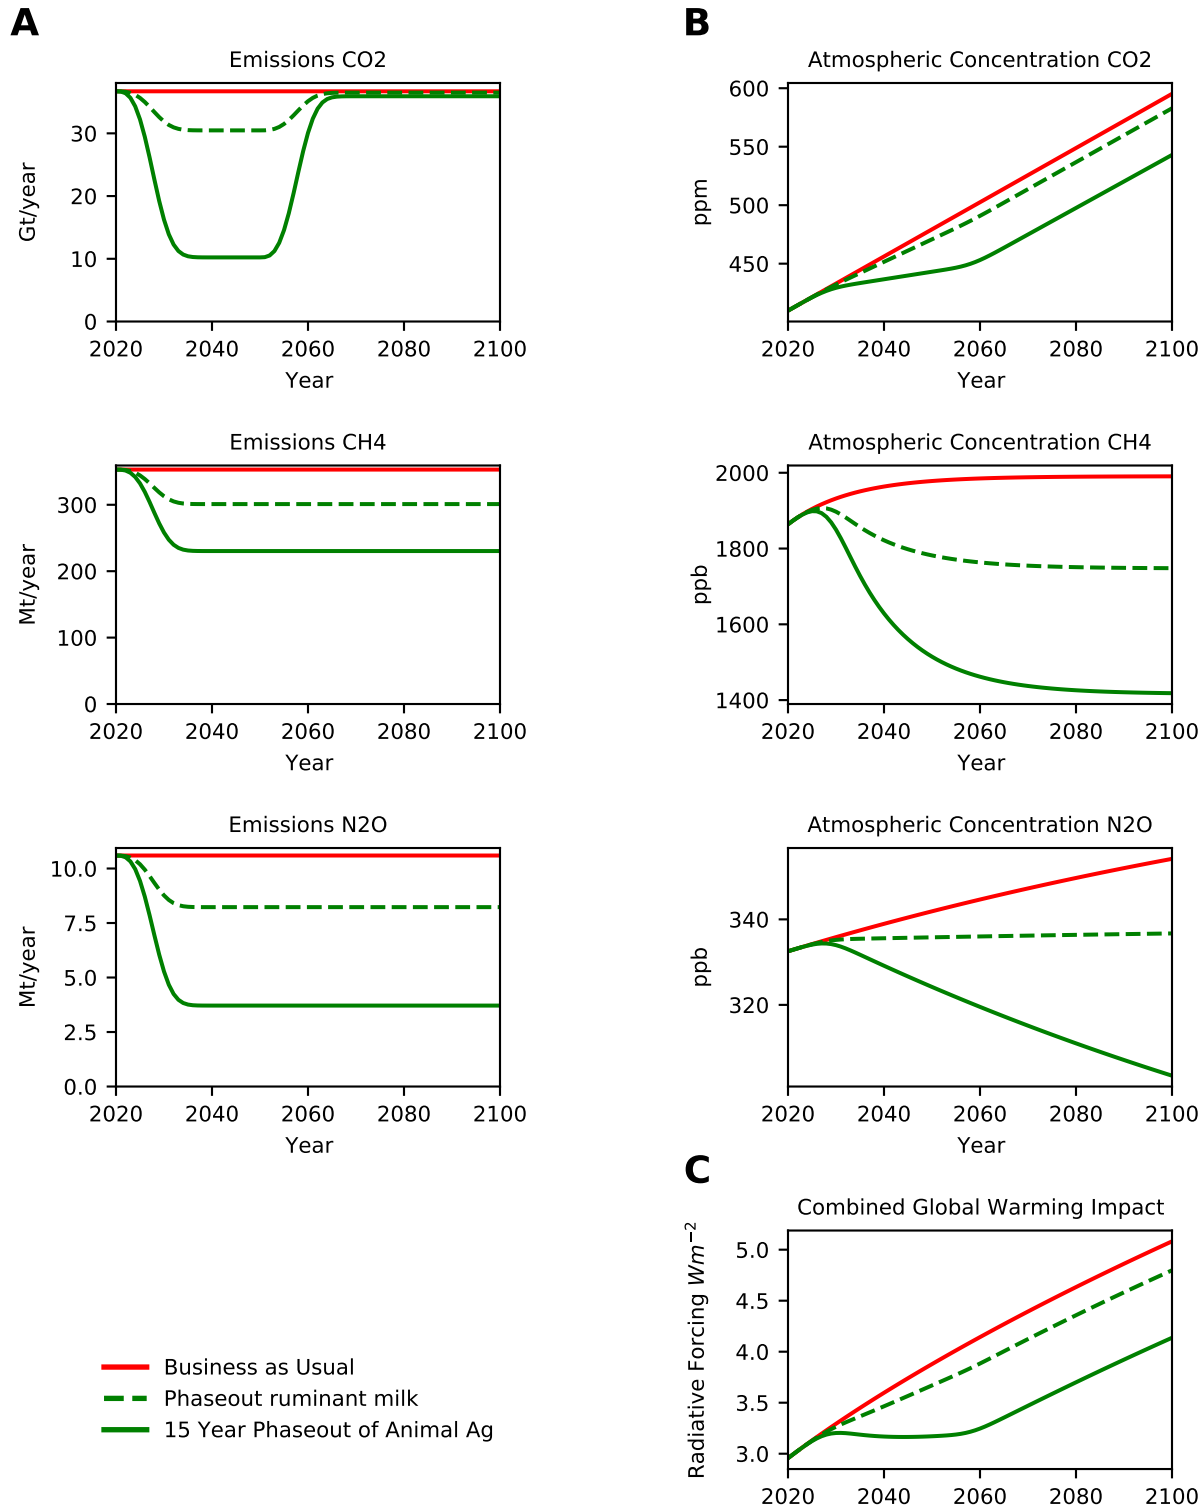

Figure 2-S7. Effects of Eliminating Ruminant Milk.

(A) Projected annual emissions of  $CO_2$ ,  $CH_4$  and  $N_2O$  for shown scenarios. (B) Projected atmospheric concentrations of  $CO_2$ ,  $CH_4$  and  $N_2O$  under each emission scenario. (C) Radiative Forcing (RF) inferred from atmospheric concentrations in (B) by formula of (Myhre et al., 1998; Ramaswamy et al., 2001) as modified in MAGICC6 (Meinshausen et al., 2011).

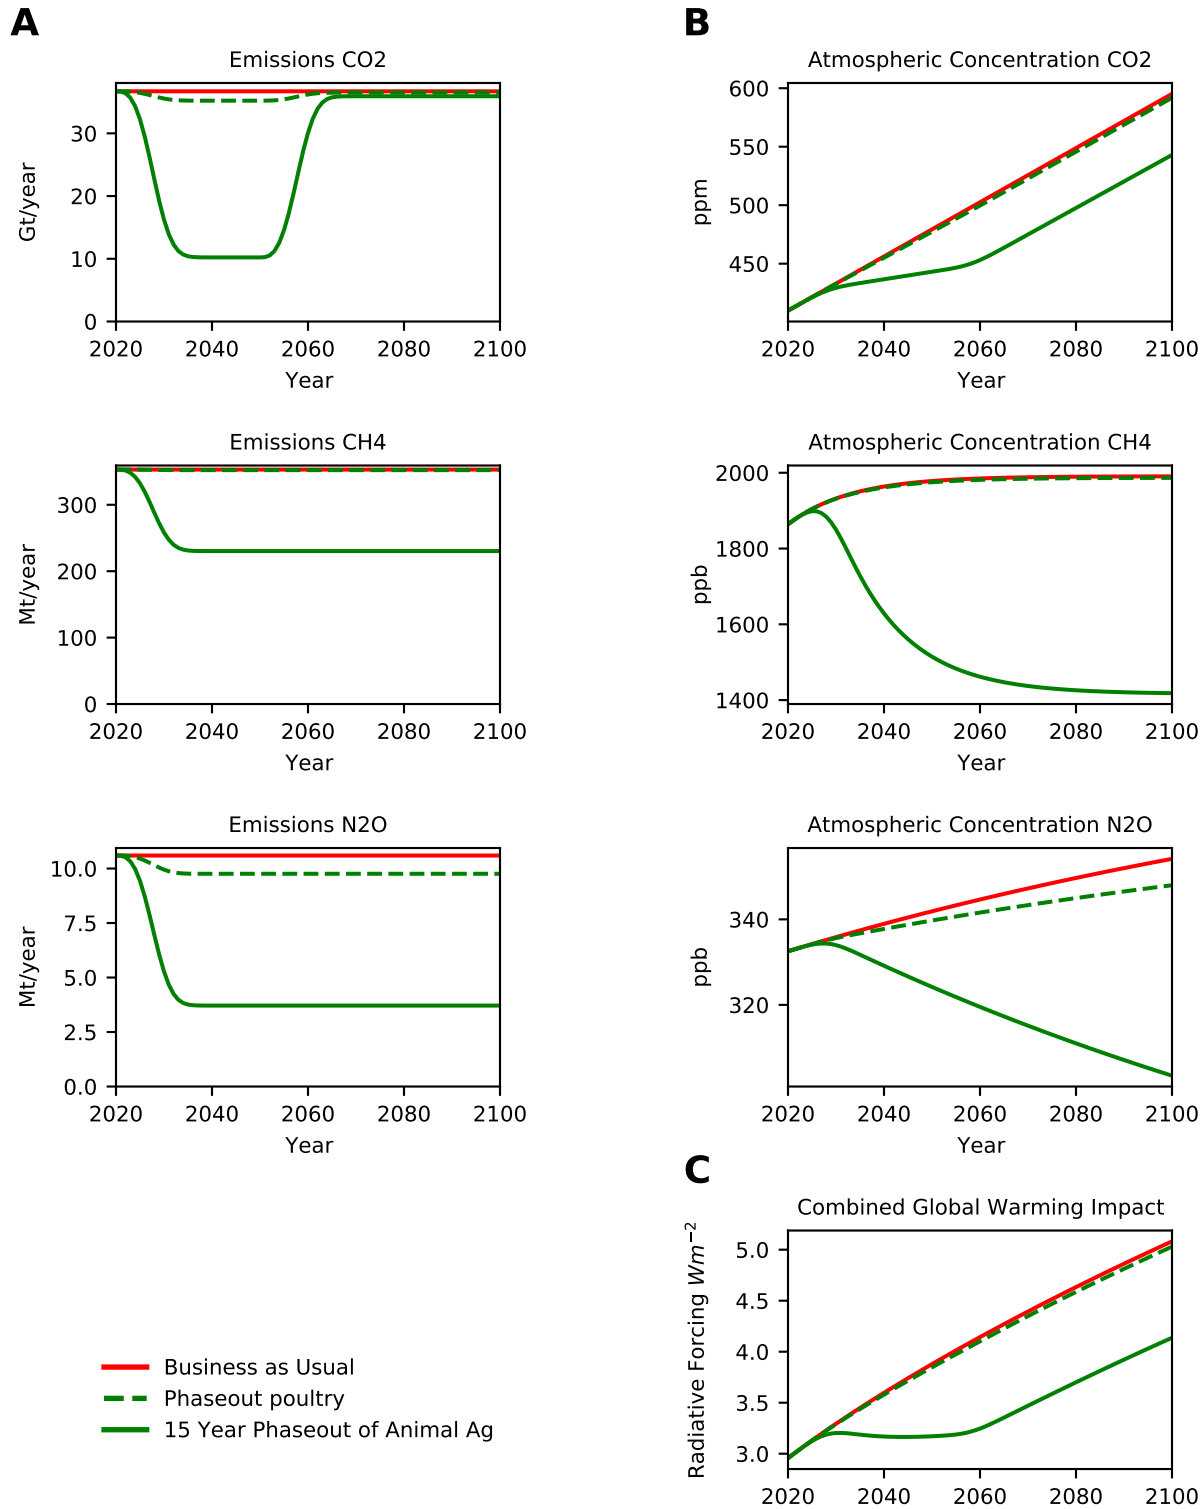

Figure 2-S8. Effects of Eliminating Poultry.

(A) Projected annual emissions of  $CO_2$ ,  $CH_4$  and  $N_2O$  for shown scenarios. (B) Projected atmospheric concentrations of  $CO_2$ ,  $CH_4$  and  $N_2O$  under each emission scenario. (C) Radiative Forcing (RF) inferred from atmospheric concentrations in (B) by formula of (Myhre et al., 1998; Ramaswamy et al., 2001) as modified in MAGICC6 (Meinshausen et al., 2011).

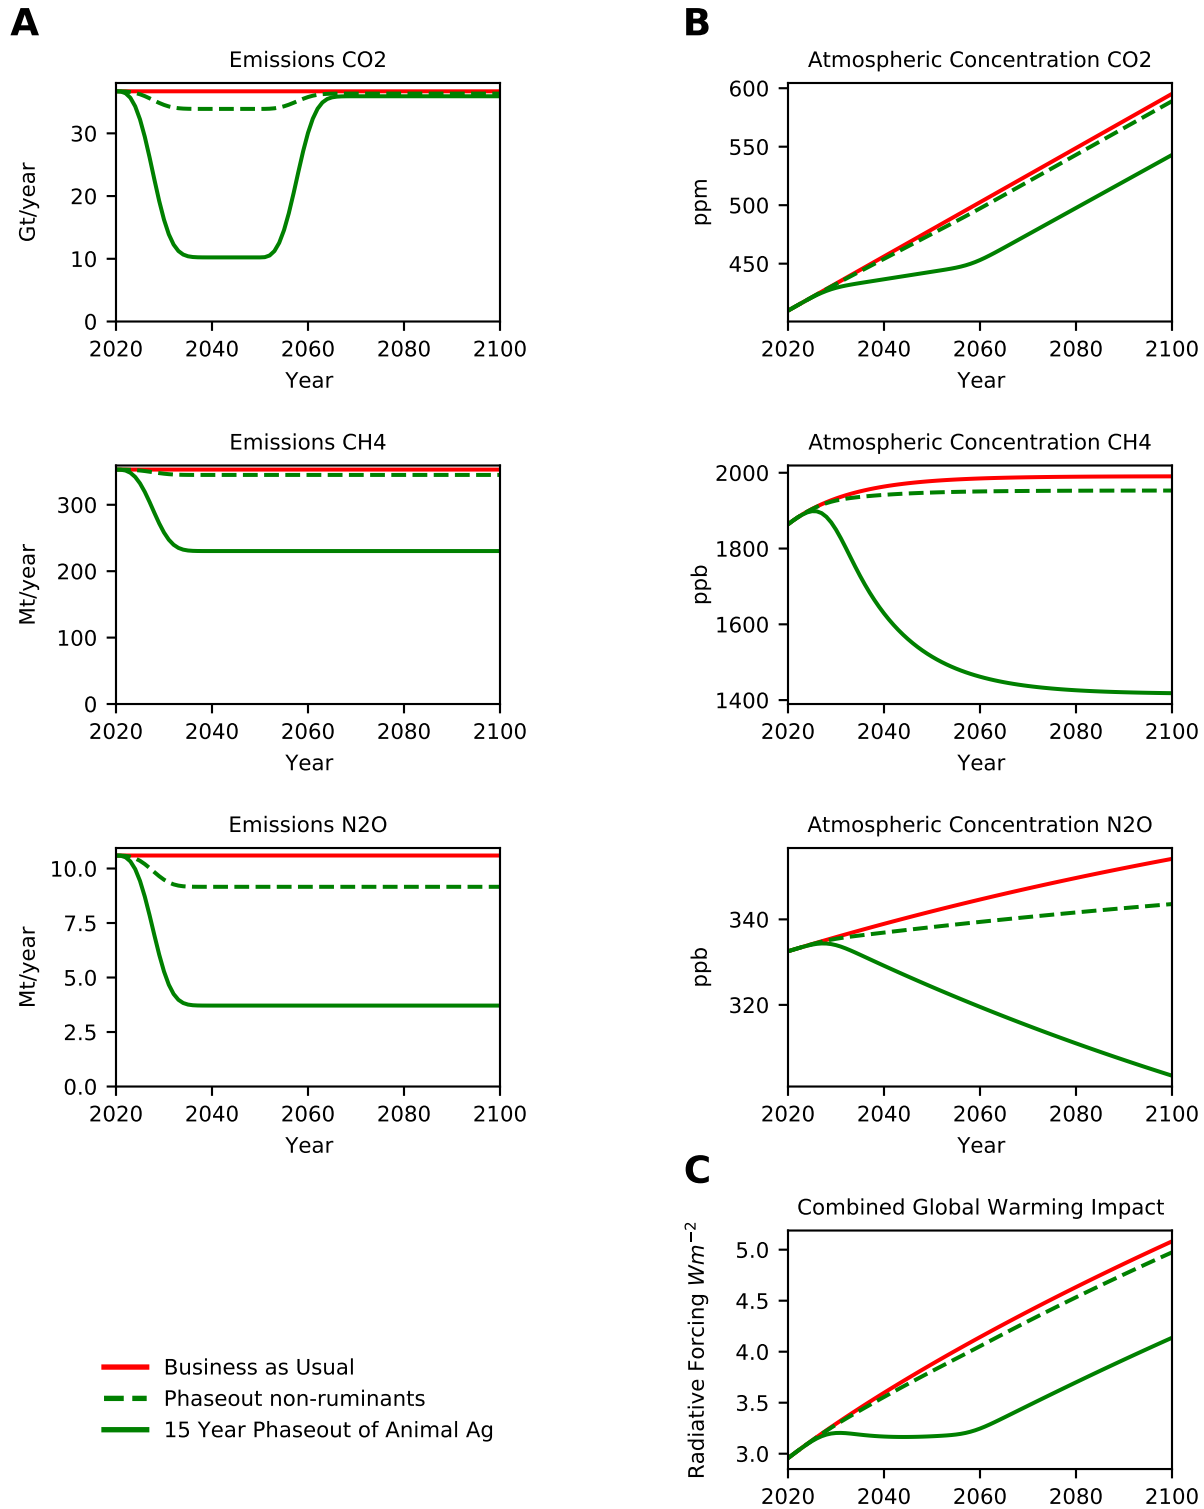

Figure 2-S9. Effects of Eliminating Non-Ruminants.

(A) Projected annual emissions of CO<sub>2</sub>, CH<sub>4</sub> and N<sub>2</sub>O for shown scenarios. (B) Projected atmospheric concentrations of CO<sub>2</sub>, CH<sub>4</sub> and N<sub>2</sub>O under each emission scenario. (C) Radiative Forcing (RF) inferred from atmospheric concentrations in (B) by formula of (Myhre et al., 1998; Ramaswamy et al., 2001) as modified in MAGICC6 (Meinshausen et al., 2011).

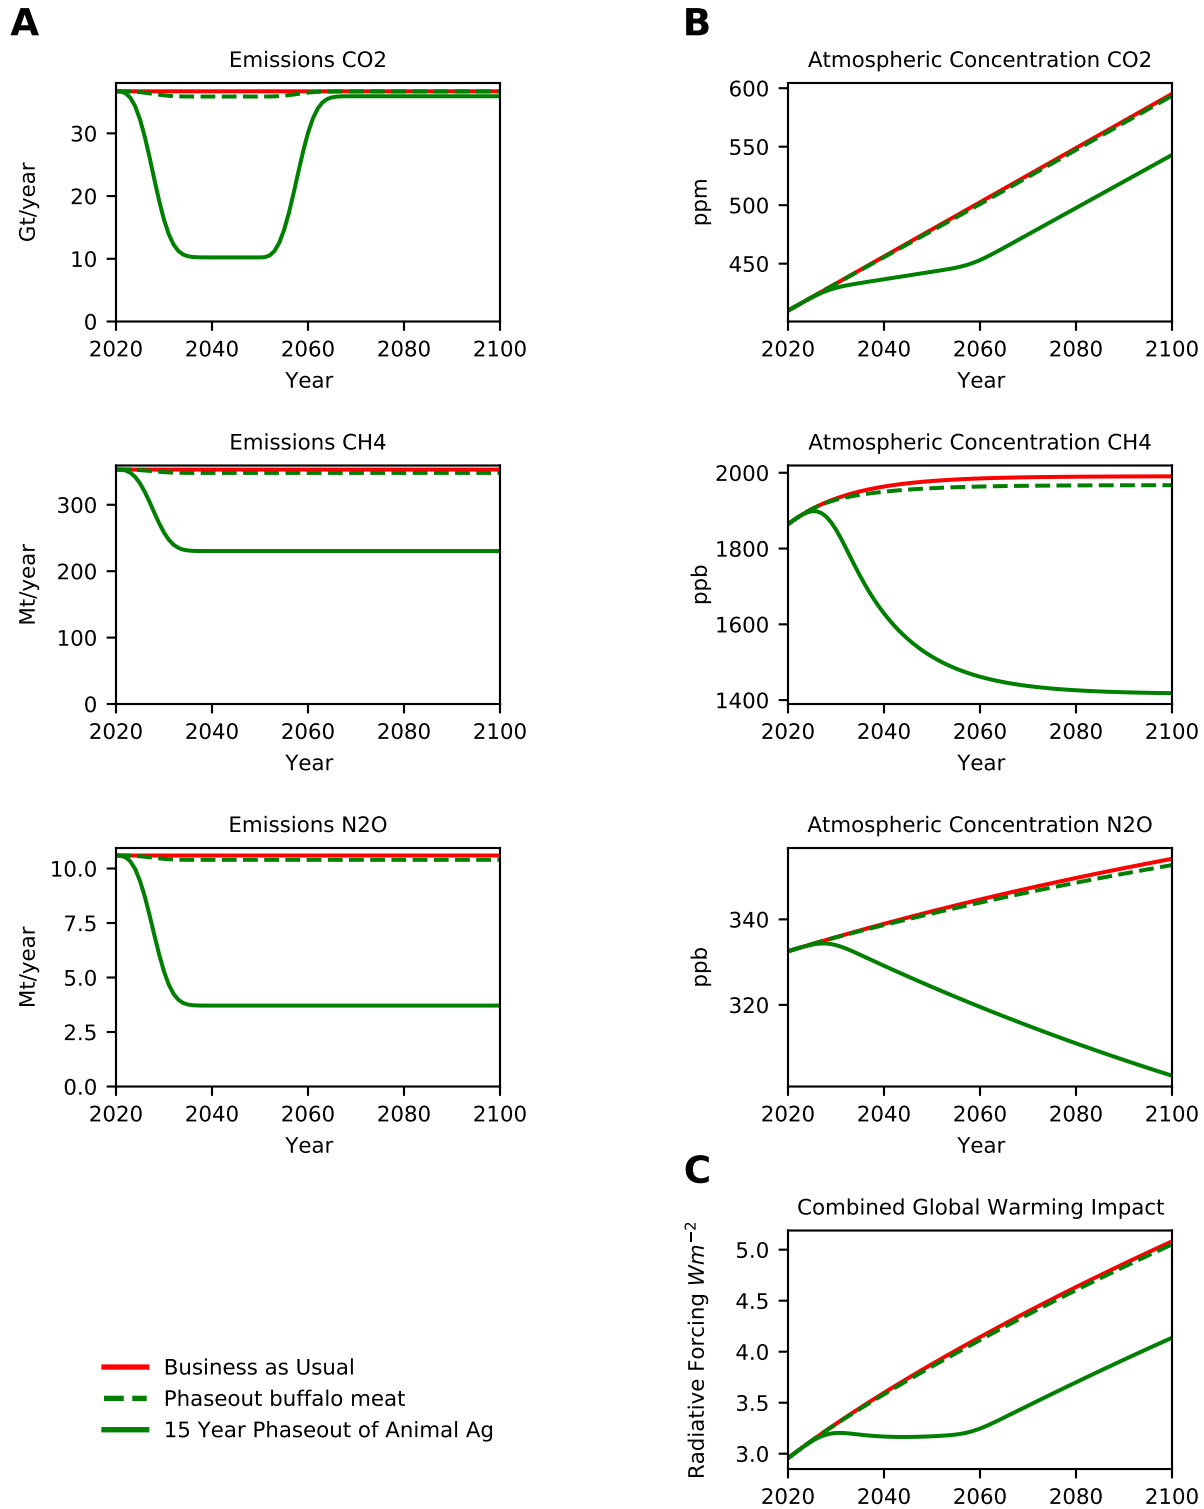

Figure 2-S10. Effects of Eliminating Buffalo Meat.

(A) Projected annual emissions of  $CO_2$ ,  $CH_4$  and  $N_2O$  for shown scenarios. (B) Projected atmospheric concentrations of  $CO_2$ ,  $CH_4$  and  $N_2O$  under each emission scenario. (C) Radiative Forcing (RF) inferred from atmospheric concentrations in (B) by formula of (Myhre et al., 1998; Ramaswamy et al., 2001) as modified in MAGICC6 (Meinshausen et al., 2011).

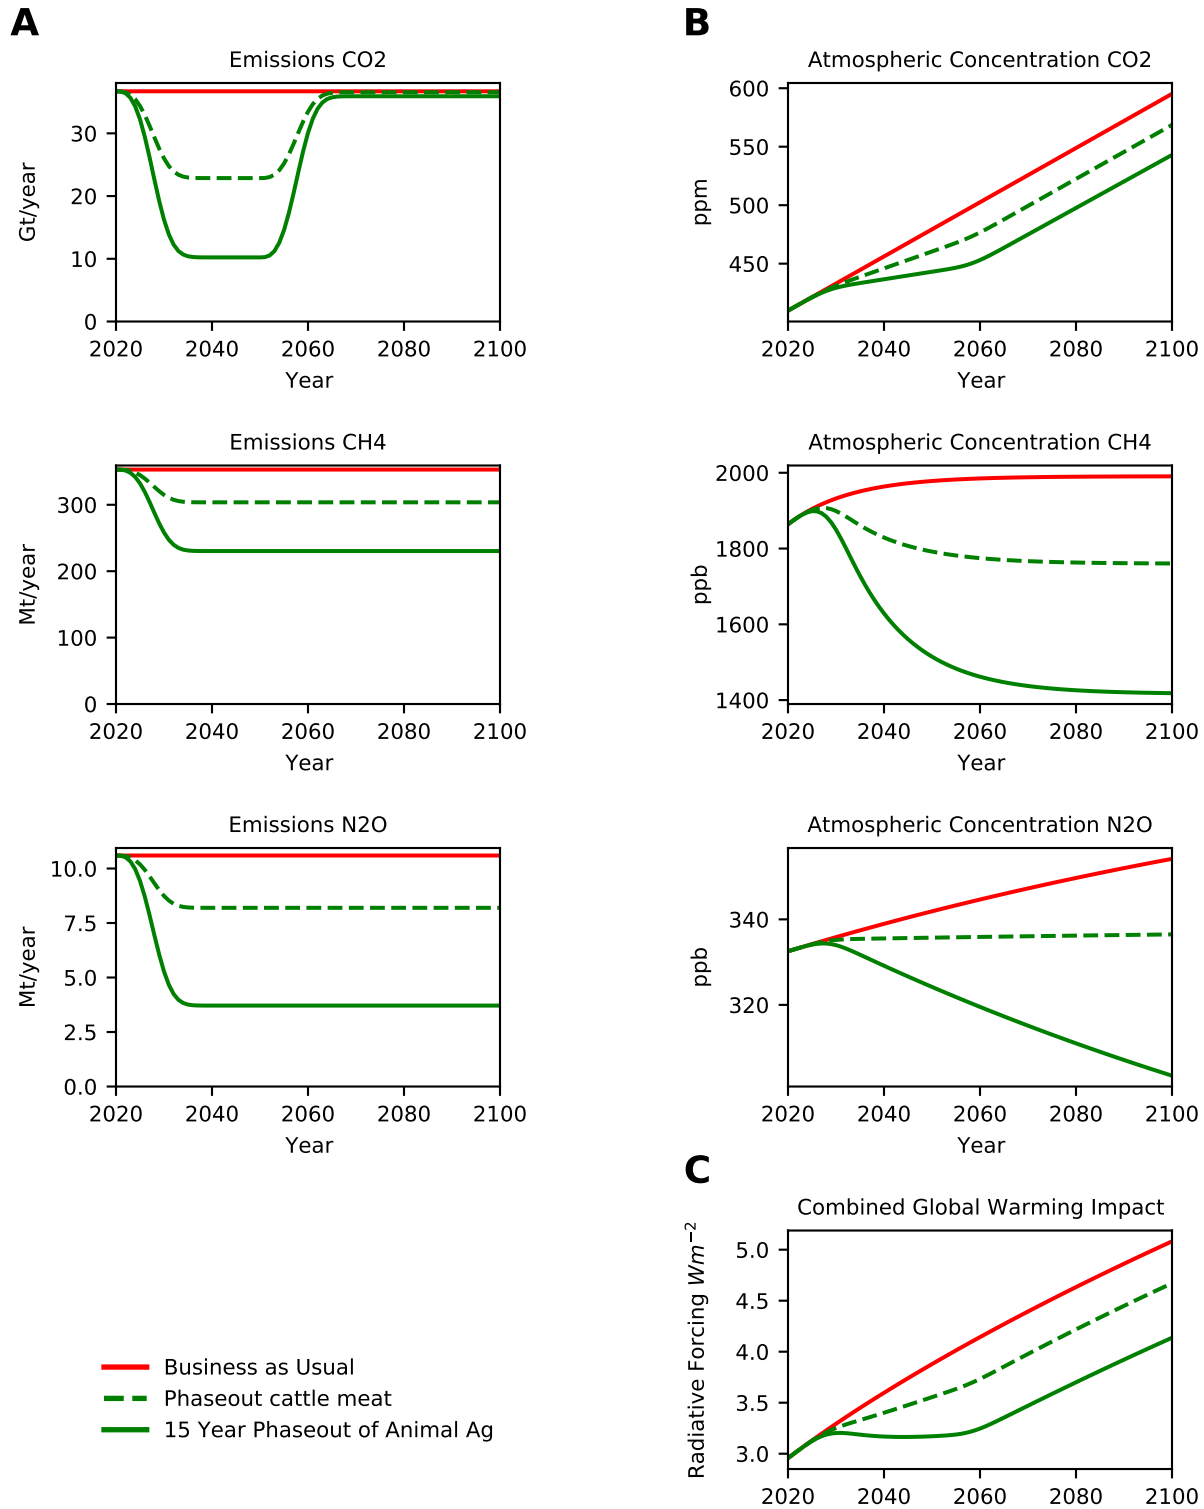

Figure 2-S11. Effects of Eliminating Cattle Meat.

(A) Projected annual emissions of  $CO_2$ ,  $CH_4$  and  $N_2O$  for shown scenarios. (B) Projected atmospheric concentrations of  $CO_2$ ,  $CH_4$  and  $N_2O$  under each emission scenario. (C) Radiative Forcing (RF) inferred from atmospheric concentrations in (B) by formula of (Myhre et al., 1998; Ramaswamy et al., 2001) as modified in MAGICC6 (Meinshausen et al., 2011).



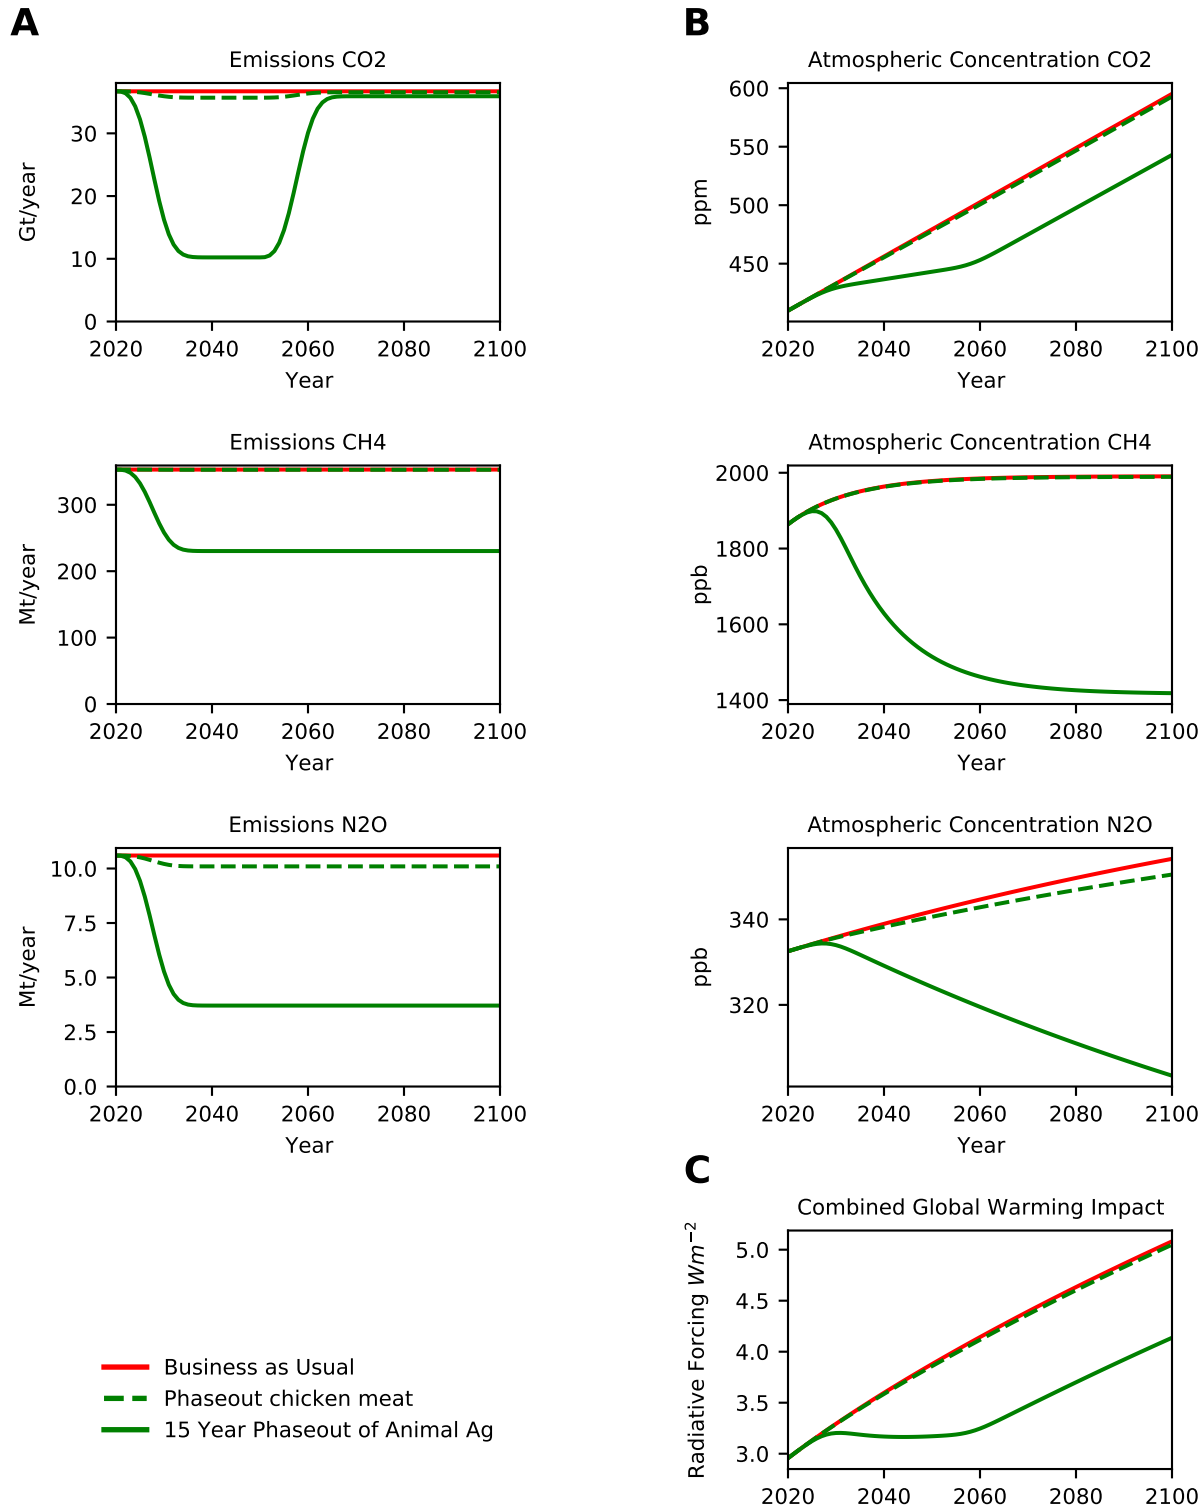

Figure 2-S12. Effects of Eliminating Chicken Meat.

(A) Projected annual emissions of CO<sub>2</sub>, CH<sub>4</sub> and N<sub>2</sub>O for shown scenarios. (B) Projected atmospheric concentrations of CO<sub>2</sub>, CH<sub>4</sub> and N<sub>2</sub>O under each emission scenario. (C) Radiative Forcing (RF) inferred from atmospheric concentrations in (B) by formula of (Myhre et al., 1998; Ramaswamy et al., 2001) as modified in MAGICC6 (Meinshausen et al., 2011).

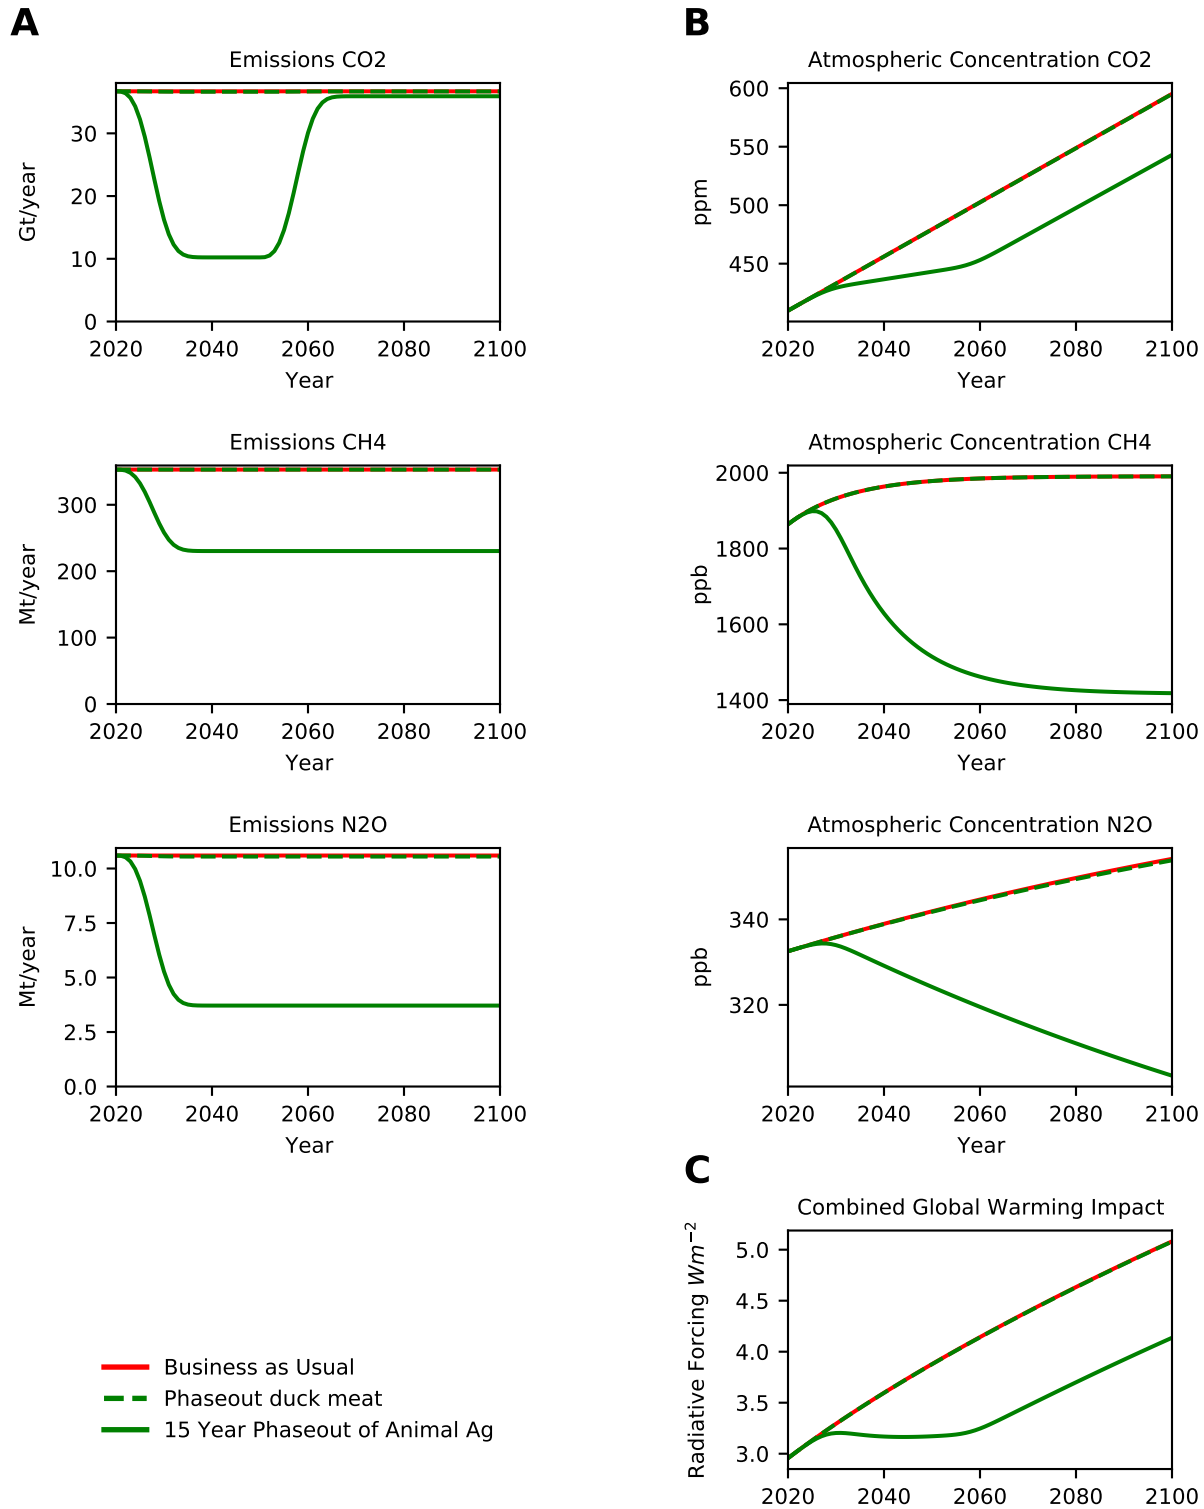

Figure 2-S13. Effects of Eliminating Duck Meat.

(A) Projected annual emissions of  $CO_2$ ,  $CH_4$  and  $N_2O$  for shown scenarios. (B) Projected atmospheric concentrations of  $CO_2$ ,  $CH_4$  and  $N_2O$  under each emission scenario. (C) Radiative Forcing (RF) inferred from atmospheric concentrations in (B) by formula of (Myhre et al., 1998; Ramaswamy et al., 2001) as modified in MAGICC6 (Meinshausen et al., 2011).

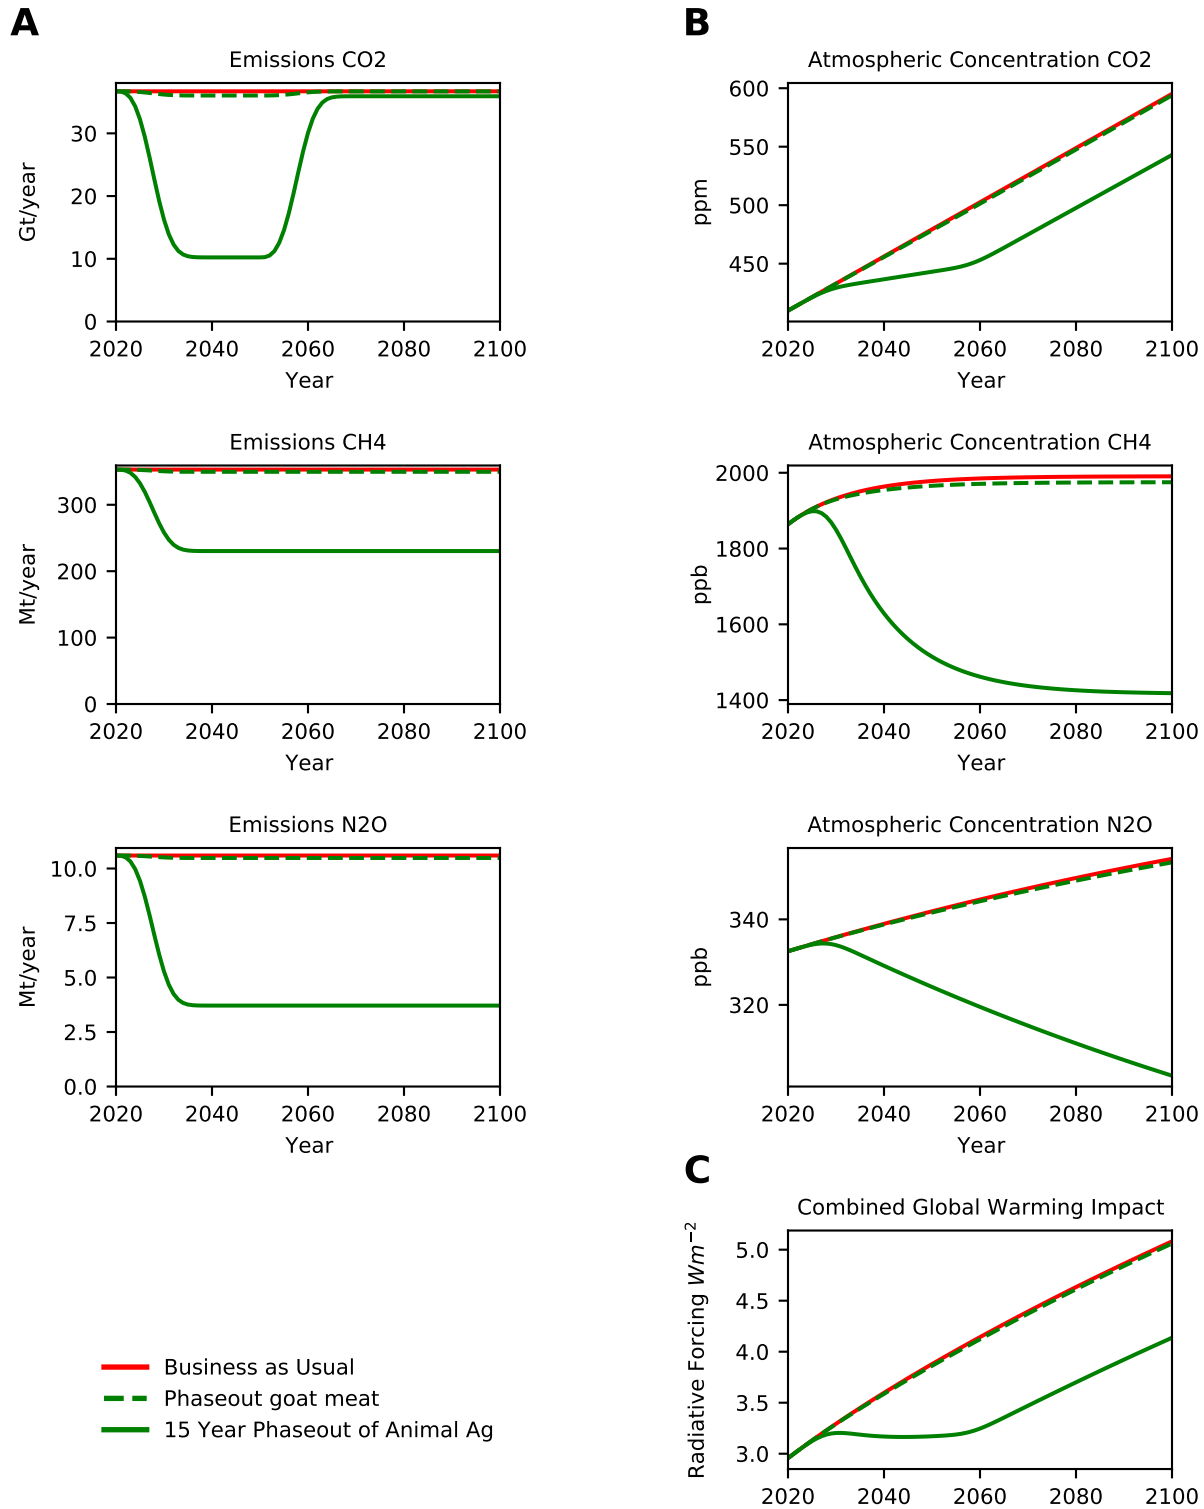

Figure 2-S14. Effects of Eliminating Goat Meat.

(A) Projected annual emissions of  $CO_2$ ,  $CH_4$  and  $N_2O$  for shown scenarios. (B) Projected atmospheric concentrations of  $CO_2$ ,  $CH_4$  and  $N_2O$  under each emission scenario. (C) Radiative Forcing (RF) inferred from atmospheric concentrations in (B) by formula of (Myhre et al., 1998; Ramaswamy et al., 2001) as modified in MAGICC6 (Meinshausen et al., 2011).

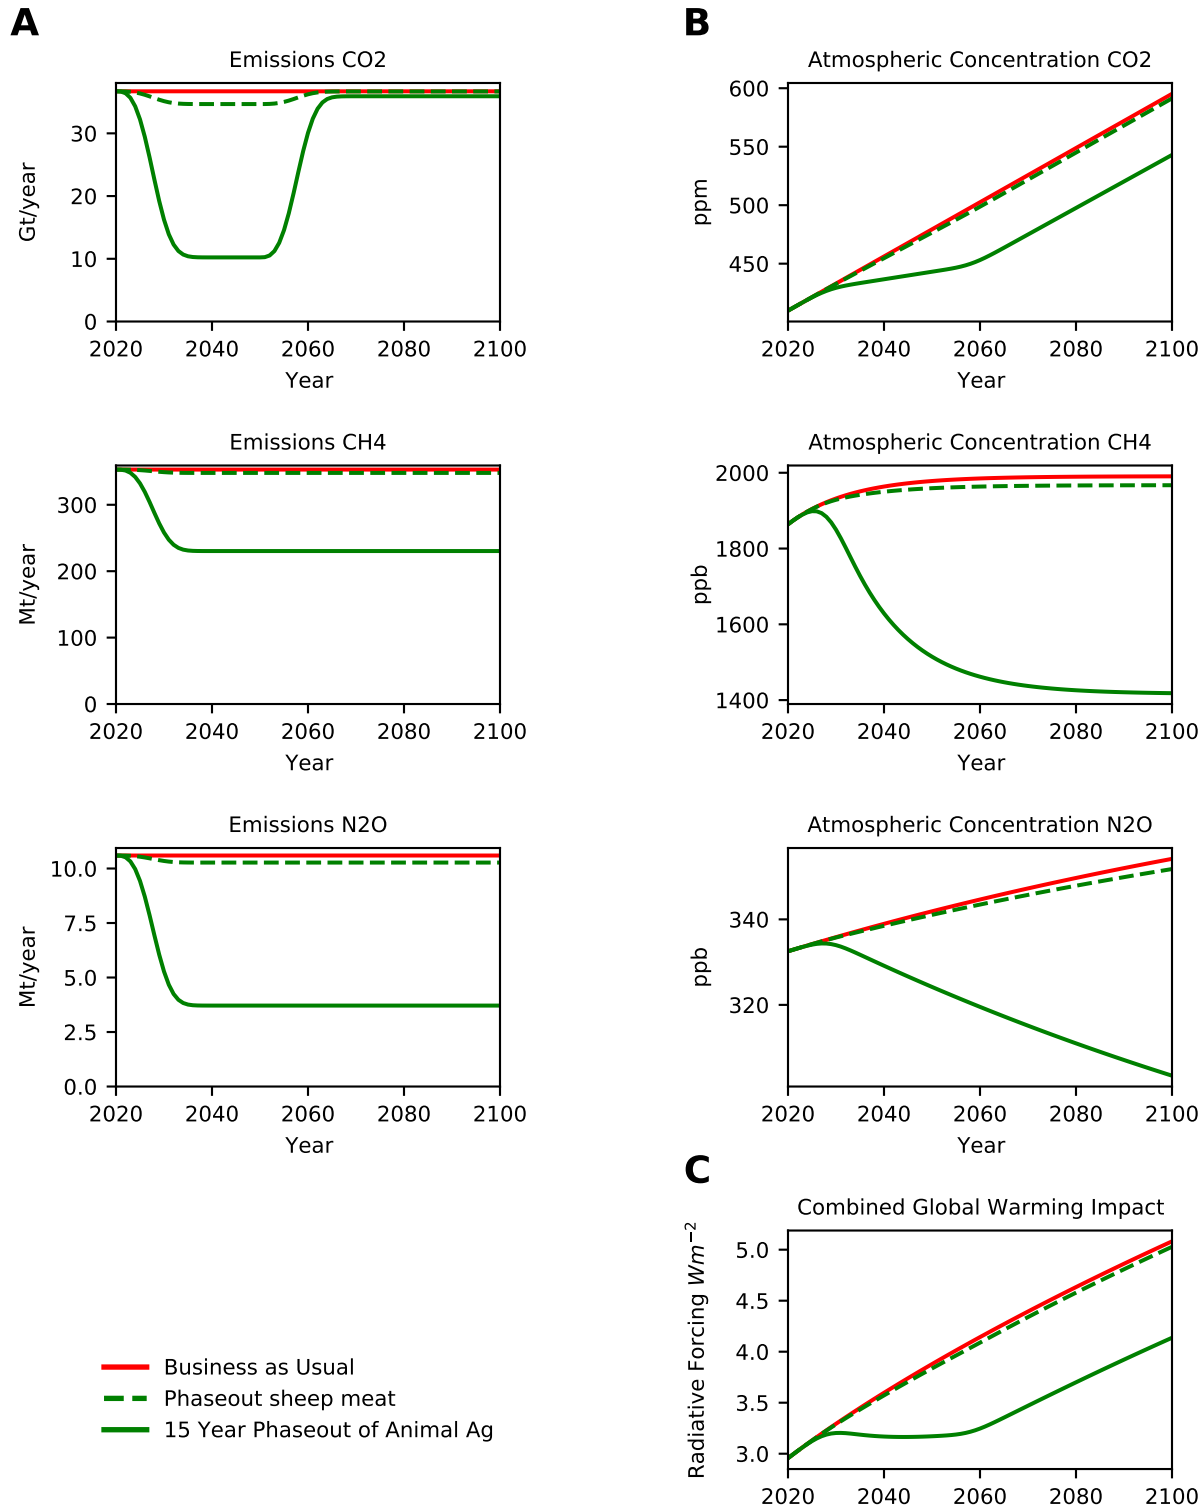

Figure 2-S15. Effects of Eliminating Sheep Meat.

(A) Projected annual emissions of  $CO_2$ ,  $CH_4$  and  $N_2O$  for shown scenarios. (B) Projected atmospheric concentrations of  $CO_2$ ,  $CH_4$  and  $N_2O$  under each emission scenario. (C) Radiative Forcing (RF) inferred from atmospheric concentrations in (B) by formula of (Myhre et al., 1998; Ramaswamy et al., 2001) as modified in MAGICC6 (Meinshausen et al., 2011).

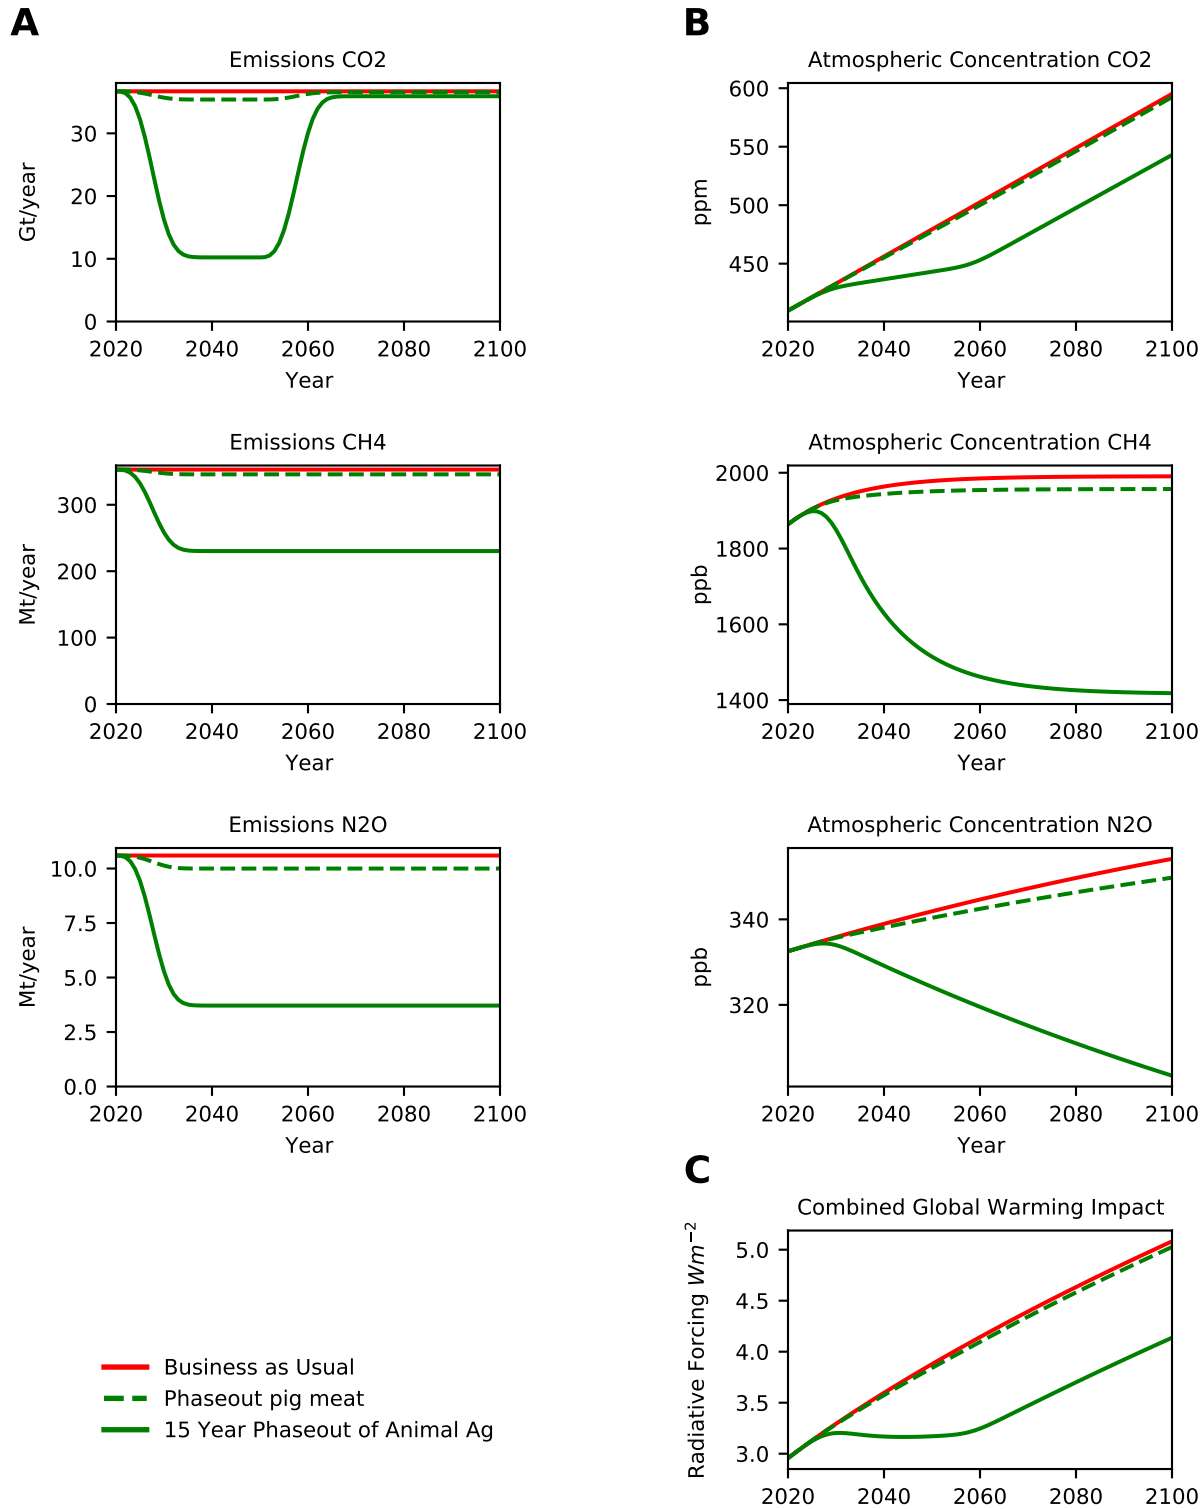

Figure 2-S16. Effects of Eliminating Pig Meat.

(A) Projected annual emissions of  $CO_2$ ,  $CH_4$  and  $N_2O$  for shown scenarios. (B) Projected atmospheric concentrations of  $CO_2$ ,  $CH_4$  and  $N_2O$  under each emission scenario. (C) Radiative Forcing (RF) inferred from atmospheric concentrations in (B) by formula of (Myhre et al., 1998; Ramaswamy et al., 2001) as modified in MAGICC6 (Meinshausen et al., 2011).

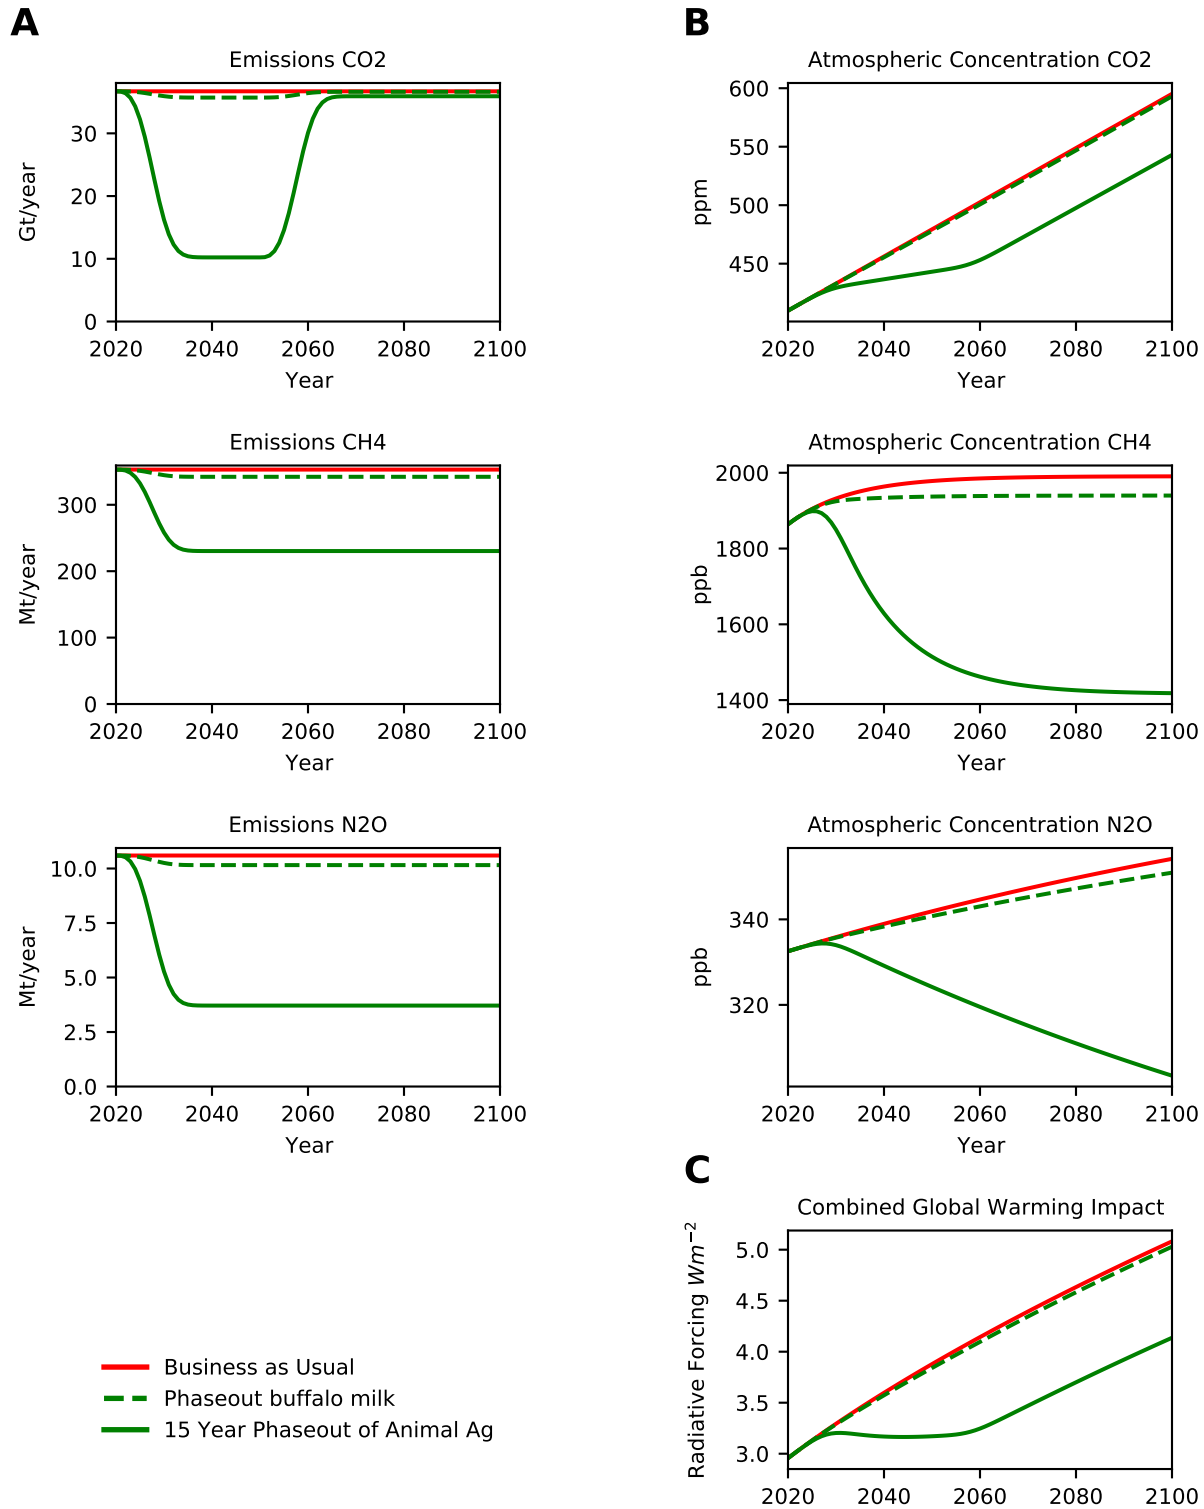

Figure 2-S17. Effects of Eliminating Buffalo Milk.

(A) Projected annual emissions of  $CO_2$ ,  $CH_4$  and  $N_2O$  for shown scenarios. (B) Projected atmospheric concentrations of  $CO_2$ ,  $CH_4$  and  $N_2O$  under each emission scenario. (C) Radiative Forcing (RF) inferred from atmospheric concentrations in (B) by formula of (Myhre et al., 1998; Ramaswamy et al., 2001) as modified in MAGICC6 (Meinshausen et al., 2011).

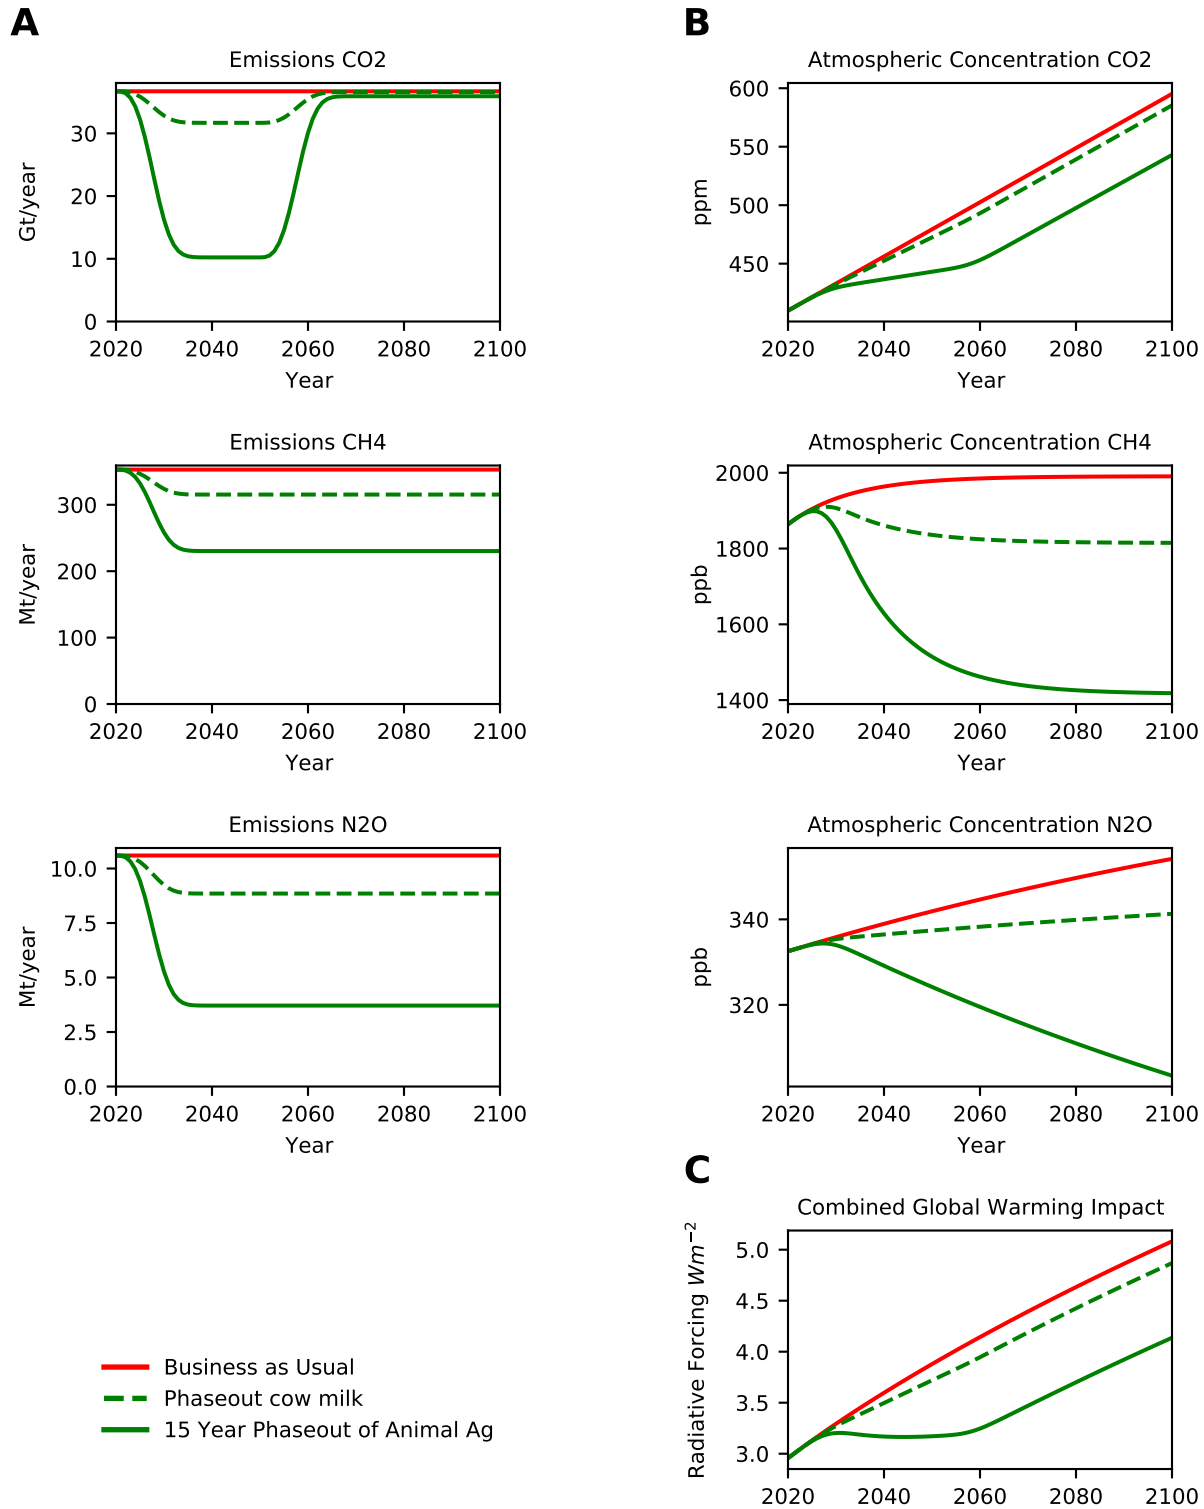

Figure 2-S18. Effects of Eliminating Cow Milk.

(A) Projected annual emissions of  $CO_2$ ,  $CH_4$  and  $N_2O$  for shown scenarios. (B) Projected atmospheric concentrations of  $CO_2$ ,  $CH_4$  and  $N_2O$  under each emission scenario. (C) Radiative Forcing (RF) inferred from atmospheric concentrations in (B) by formula of (Myhre et al., 1998; Ramaswamy et al., 2001) as modified in MAGICC6 (Meinshausen et al., 2011).

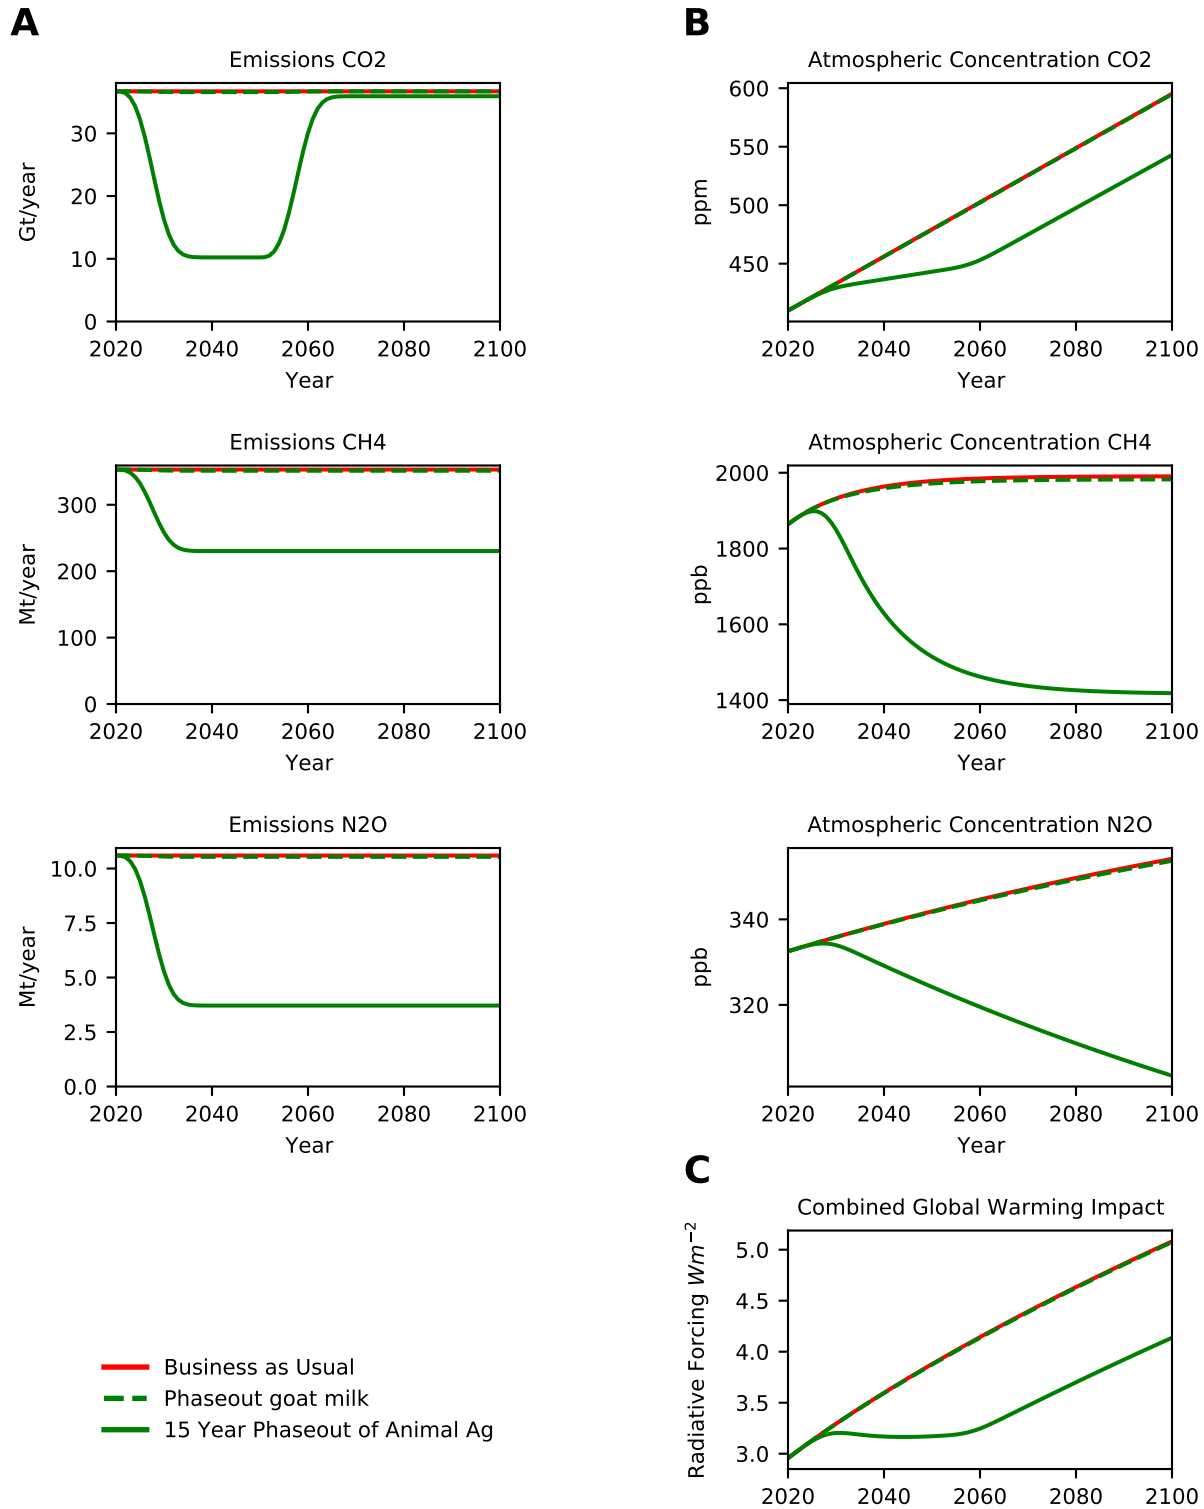

Figure 2-S19. Effects of Eliminating Goat Milk.

(A) Projected annual emissions of CO<sub>2</sub>, CH<sub>4</sub> and N<sub>2</sub>O for shown scenarios. (B) Projected atmospheric concentrations of CO<sub>2</sub>, CH<sub>4</sub> and N<sub>2</sub>O under each emission scenario. (C) Radiative Forcing (RF) inferred from atmospheric concentrations in (B) by formula of (Myhre et al., 1998; Ramaswamy et al., 2001) as modified in MAGICC6 (Meinshausen et al., 2011).



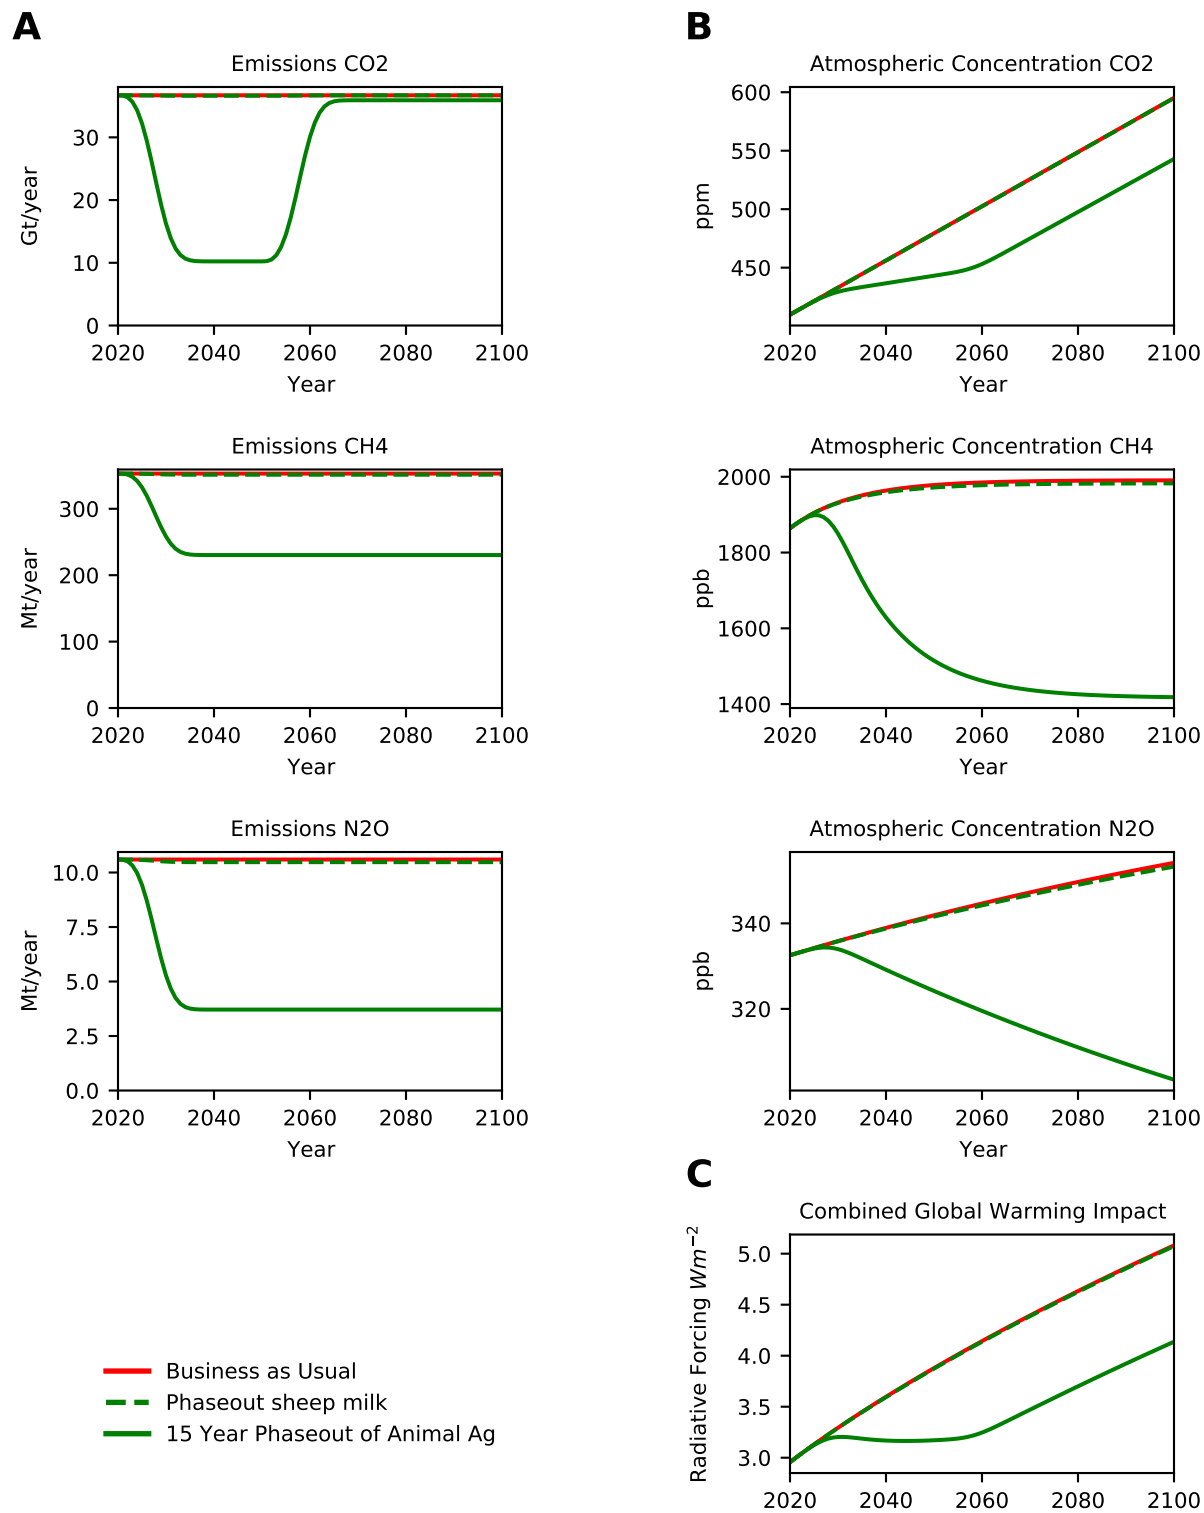

Figure 2-S20. Effects of Eliminating Sheep Milk.

(A) Projected annual emissions of  $CO_2$ ,  $CH_4$  and  $N_2O$  for shown scenarios. (B) Projected atmospheric concentrations of  $CO_2$ ,  $CH_4$  and  $N_2O$  under each emission scenario. (C) Radiative Forcing (RF) inferred from atmospheric concentrations in (B) by formula of (Myhre et al., 1998; Ramaswamy et al., 2001) as modified in MAGICC6 (Meinshausen et al., 2011).

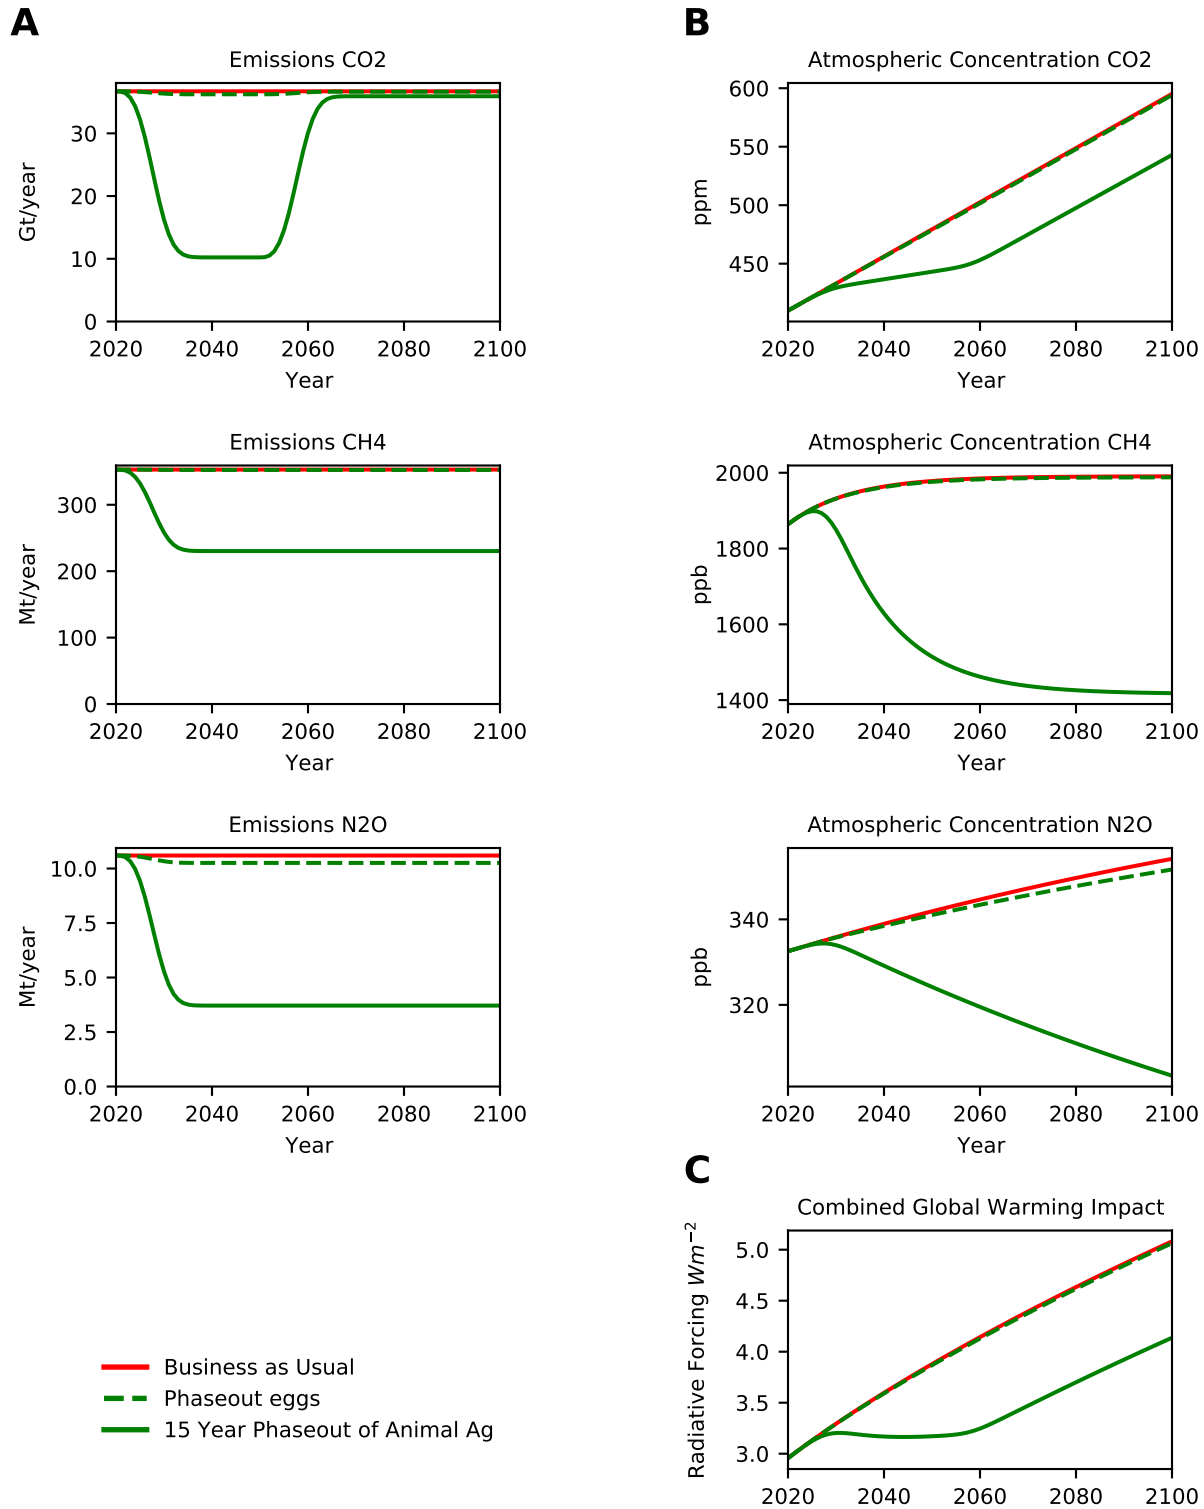

Figure 2-S21. Effects of Eliminating Eggs.

(A) Projected annual emissions of  $CO_2$ ,  $CH_4$  and  $N_2O$  for shown scenarios. (B) Projected atmospheric concentrations of  $CO_2$ ,  $CH_4$  and  $N_2O$  under each emission scenario. (C) Radiative Forcing (RF) inferred from atmospheric concentrations in (B) by formula of (Myhre et al., 1998; Ramaswamy et al., 2001) as modified in MAGICC6 (Meinshausen et al., 2011).

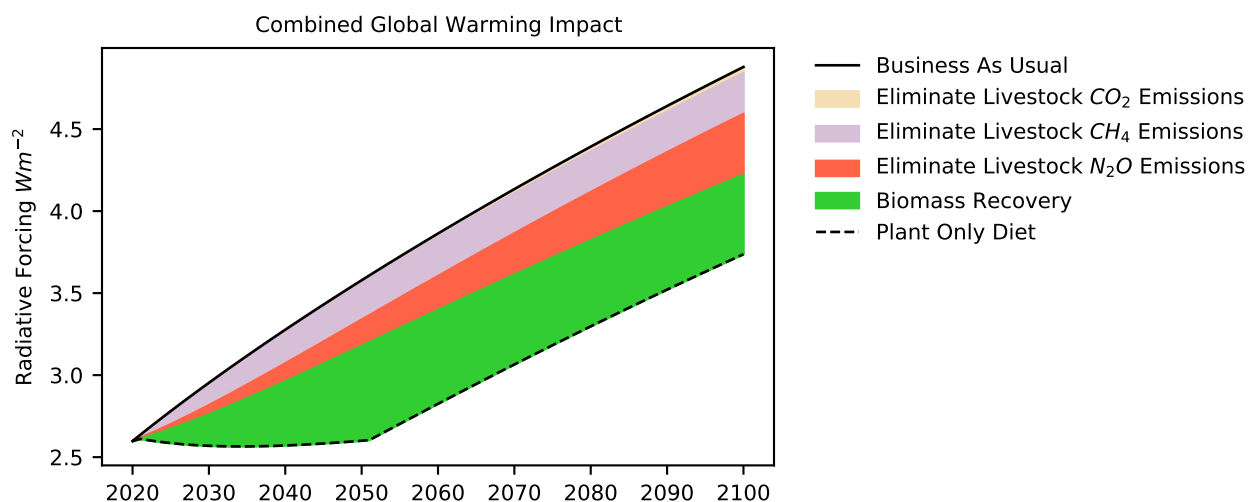

Figure 3-S1. Immediate elimination of animal agriculture reduces global warming impact of atmosphere.

Effect of eliminating emissions linked to animal agriculture and of biomass recovery on land currently used in animal agriculture on Radiative Forcing (RF), a measure of the instantaneous warming potential of the atmosphere. RF values computed from atmospheric concentrations in by formula of (Myhre et al., 1998; Ramaswamy et al., 2001) as modified in MAGICC6 (Meinshausen et al., 2011) with adjustment for gasses other than  $CO_2$ ,  $CH_4$  and  $N_2O$  as described in text.

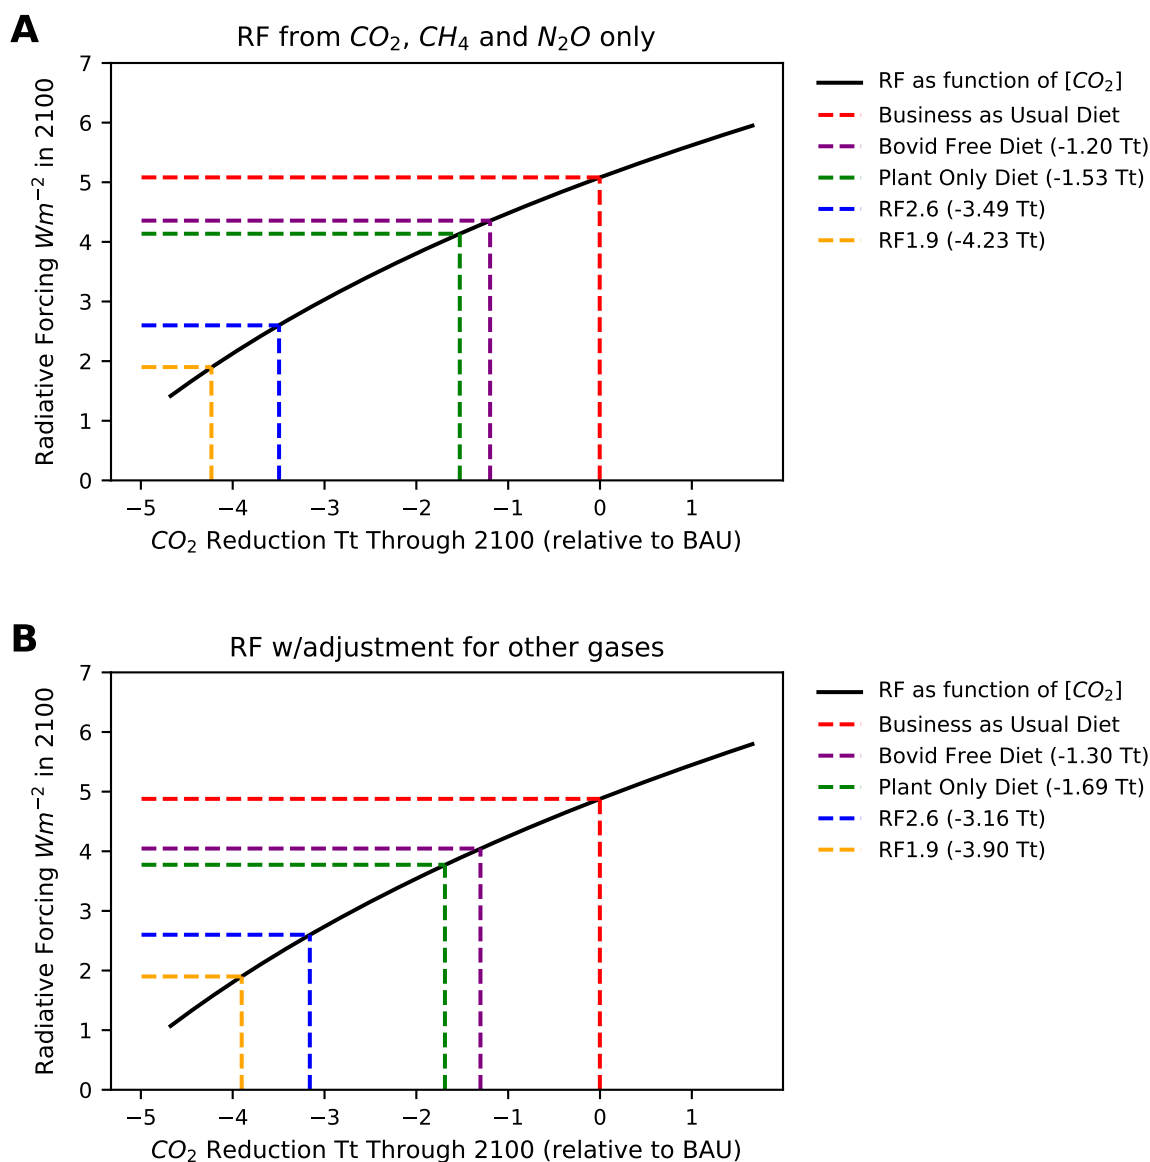

Figure 4-S1. Full carbon opportunity cost of animal agriculture.

We define the Emission and Land Carbon Opportunity Cost of animal agriculture as the total  $CO_2$  reduction necessary to lower the RF in 2100 from the level estimated for a business as usual (BAU) diet to the level estimated for a plant only diet (POD). For these calculations we fix the  $CH_4$  and  $N_2O$  levels in the RF calculation at those estimated for the BAU diet in 2100 and adjust  $CO_2$  levels to reach the target RF. We also calculate ELCOC for just bovid sourced foods and determine the emission reductions necessary to reach RF's of 2.6 and 1.9, often cited as targets for limiting warming to 2.0°C and 1.5°C respectively. (A) Shows the results for RF directly calculated from  $CO_2$ ,  $CH_4$  and  $N_2O$ , while (B) shows an RF adjusted for other gases using multivariate linear regression on MAGICC6 output downloaded from the SSP database.

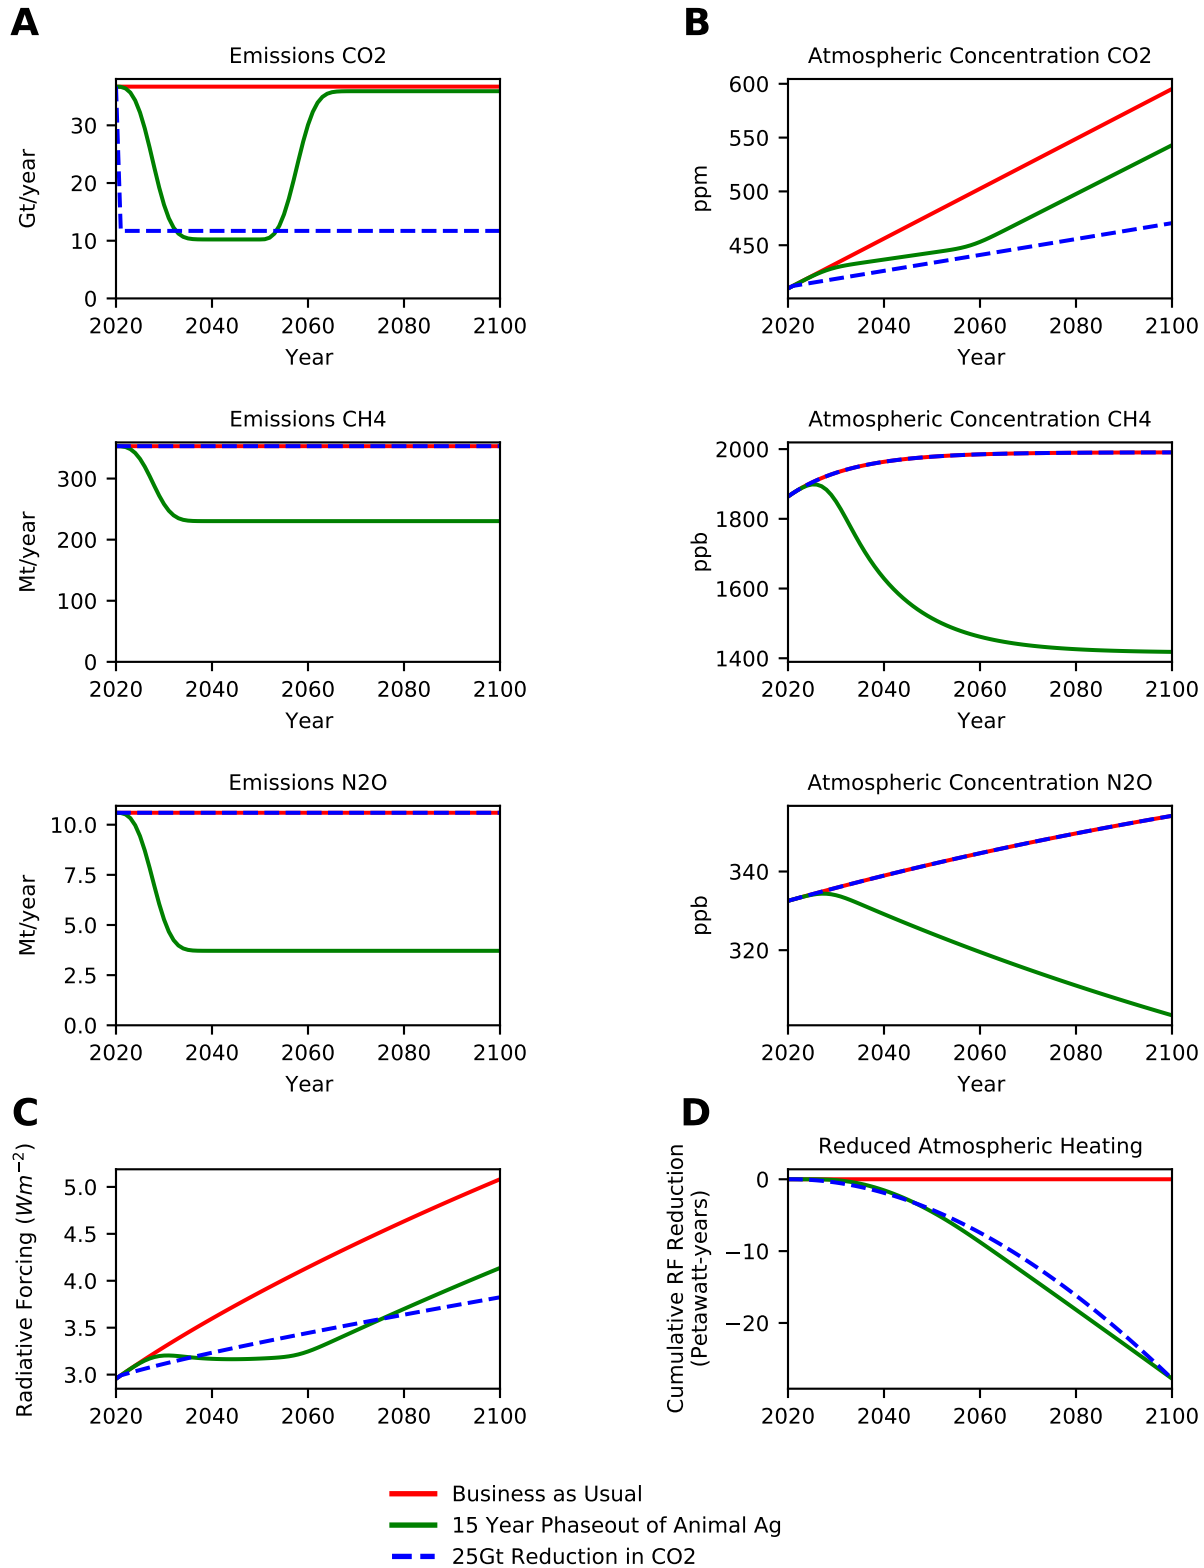

Figure 5-S1. ACO<sub>2</sub>eq Calibration for PHASE-POD in 2100.

(A) Projected annual emissions of CO<sub>2</sub>, CH<sub>4</sub> and N<sub>2</sub>O for shown scenarios. (B) Projected atmospheric concentrations of CO<sub>2</sub>, CH<sub>4</sub> and N<sub>2</sub>O under each emission scenario. (C) Radiation Forcing. (D) Cumulative difference between scenario and BAU of Radiative Forcing.

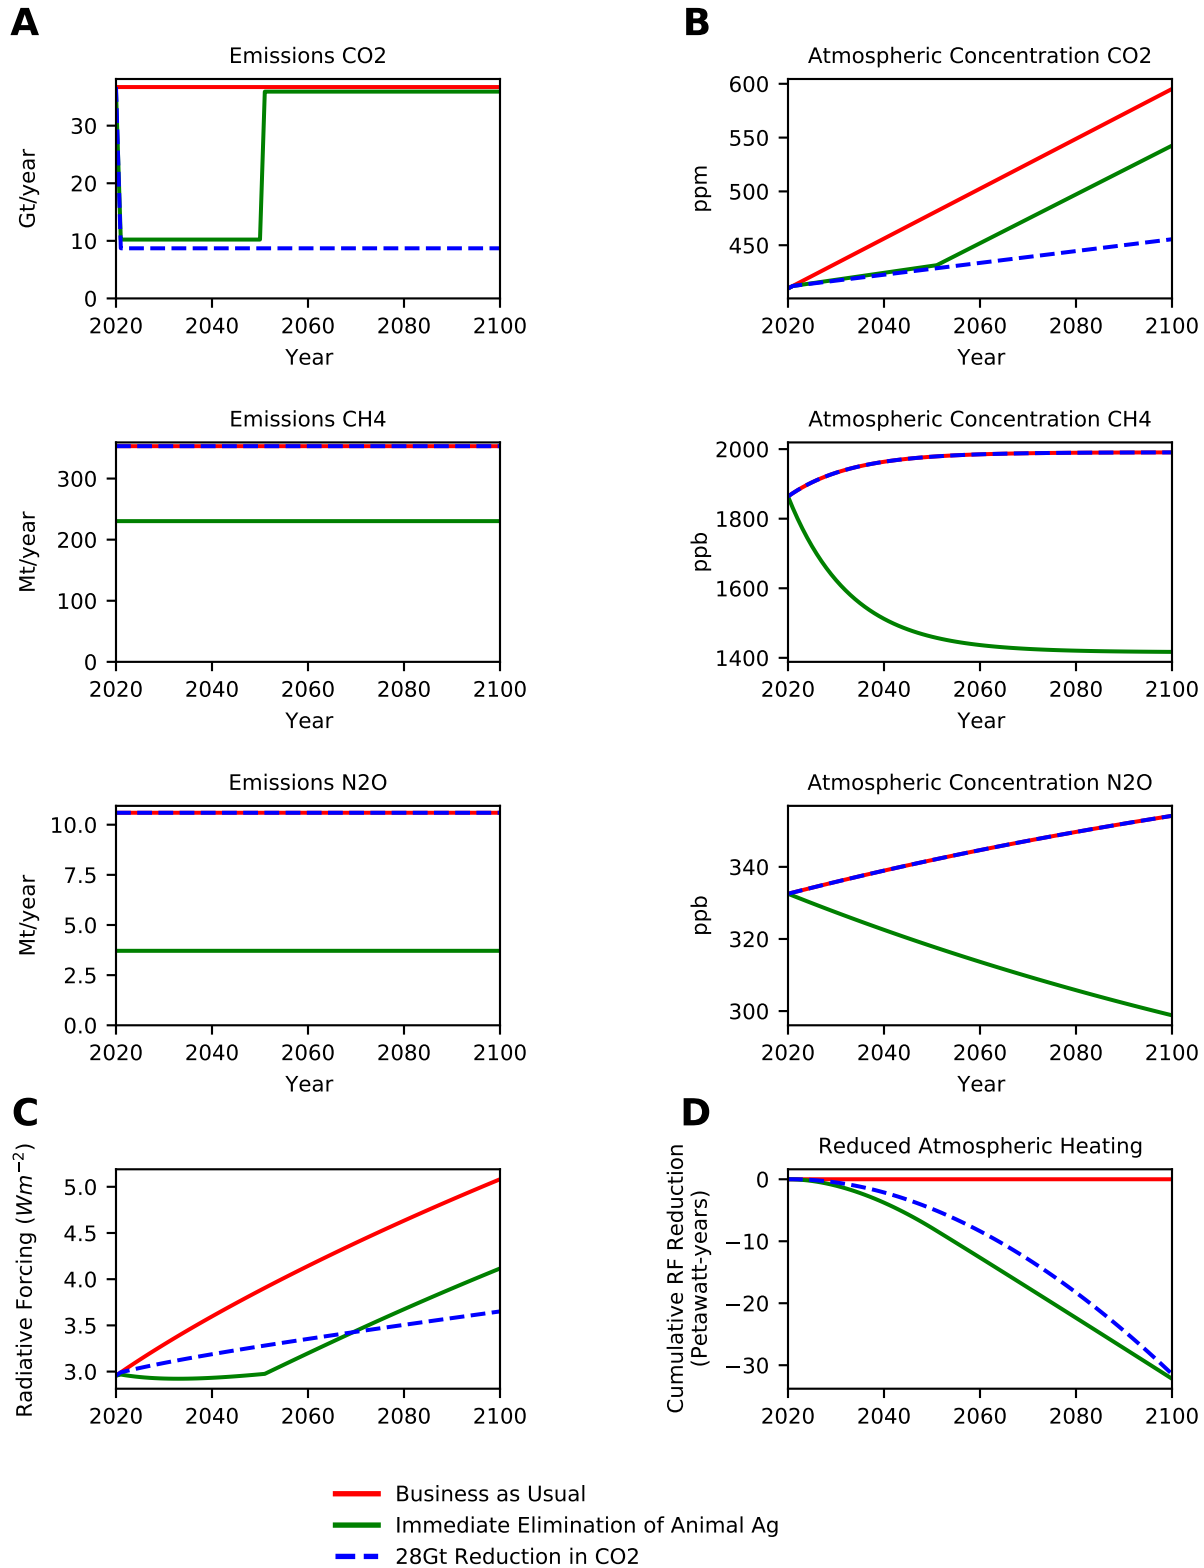

Figure 5-S2. ACO<sub>2eq</sub> Calibration for IMM-POD in 2100..

(A) Projected annual emissions of CO<sub>2</sub>, CH<sub>4</sub> and N<sub>2</sub>O for shown scenarios. (B) Projected atmospheric concentrations of CO<sub>2</sub>, CH<sub>4</sub> and N<sub>2</sub>O under each emission scenario. (C) Cumulative difference between scenario and BAU of Radiative Forcing.

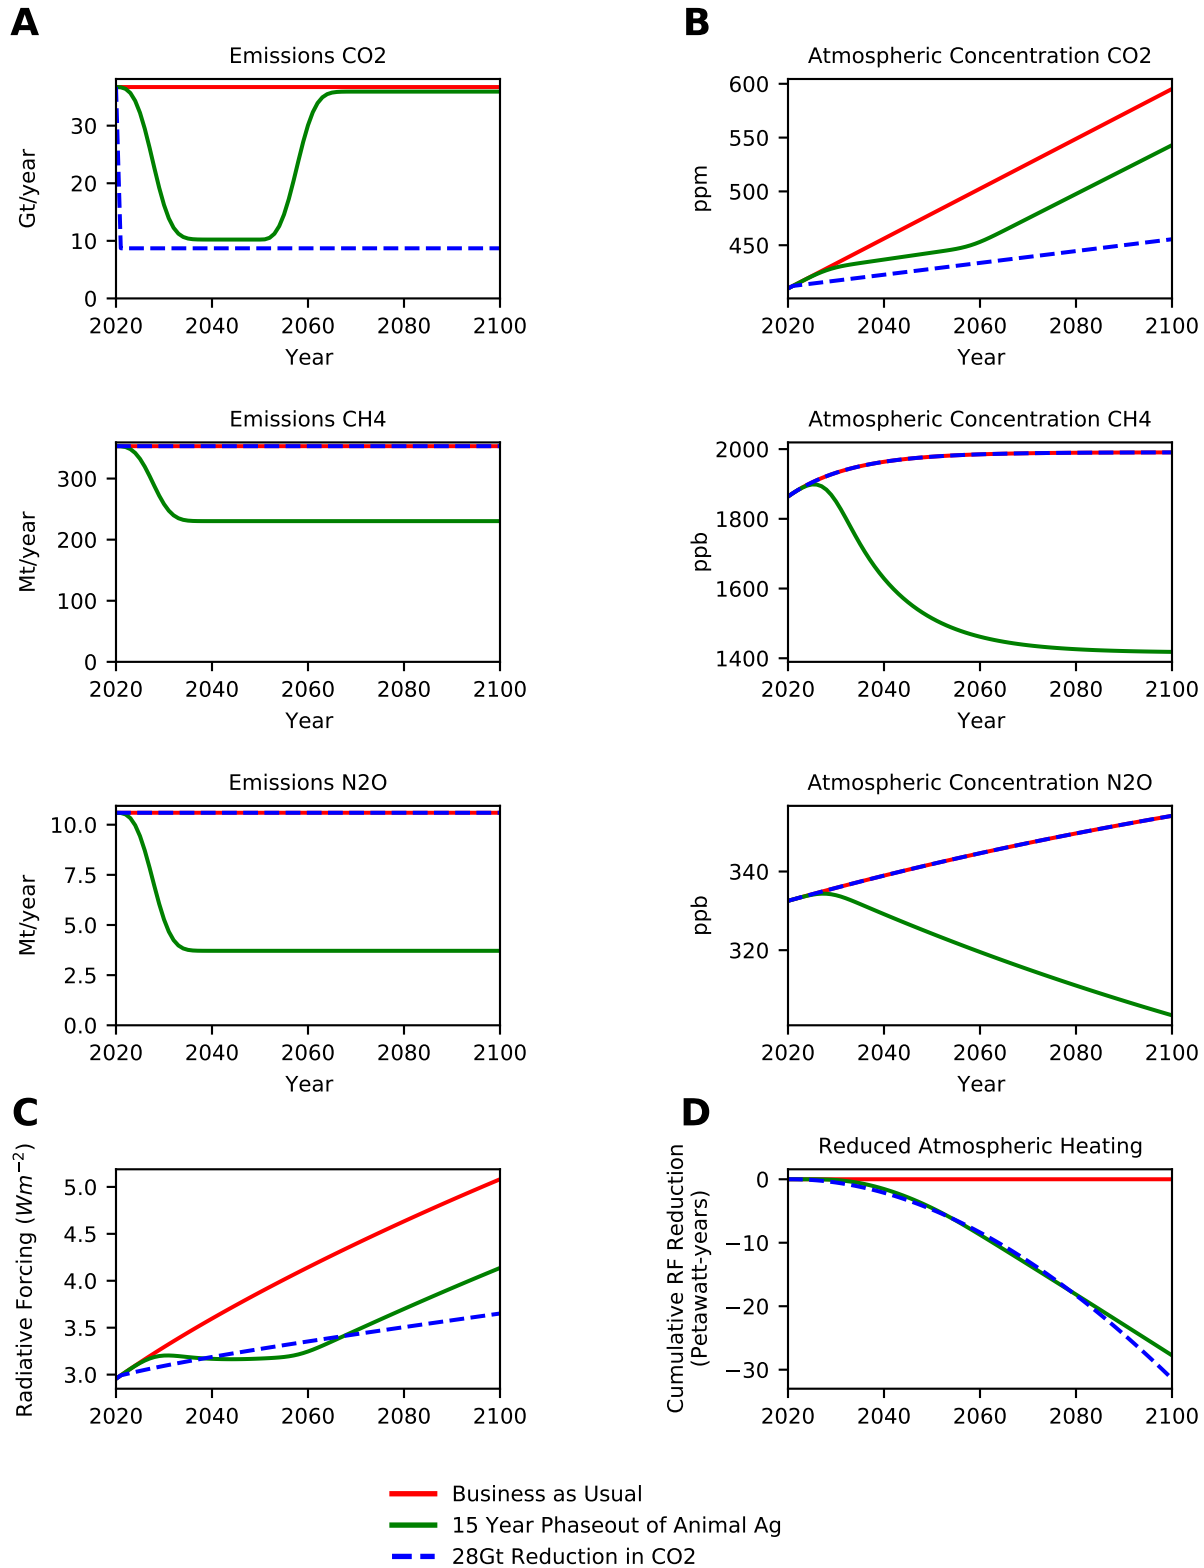

Figure 5-S3. ACO<sub>2</sub>eq Calibration for PHASE-POD in 2050.

(A) Projected annual emissions of CO<sub>2</sub>, CH<sub>4</sub> and N<sub>2</sub>O for shown scenarios. (B) Projected atmospheric concentrations of CO<sub>2</sub>, CH<sub>4</sub> and N<sub>2</sub>O under each emission scenario. (C) Radiation Forcing. (D) Cumulative difference between scenario and BAU of Radiative Forcing.

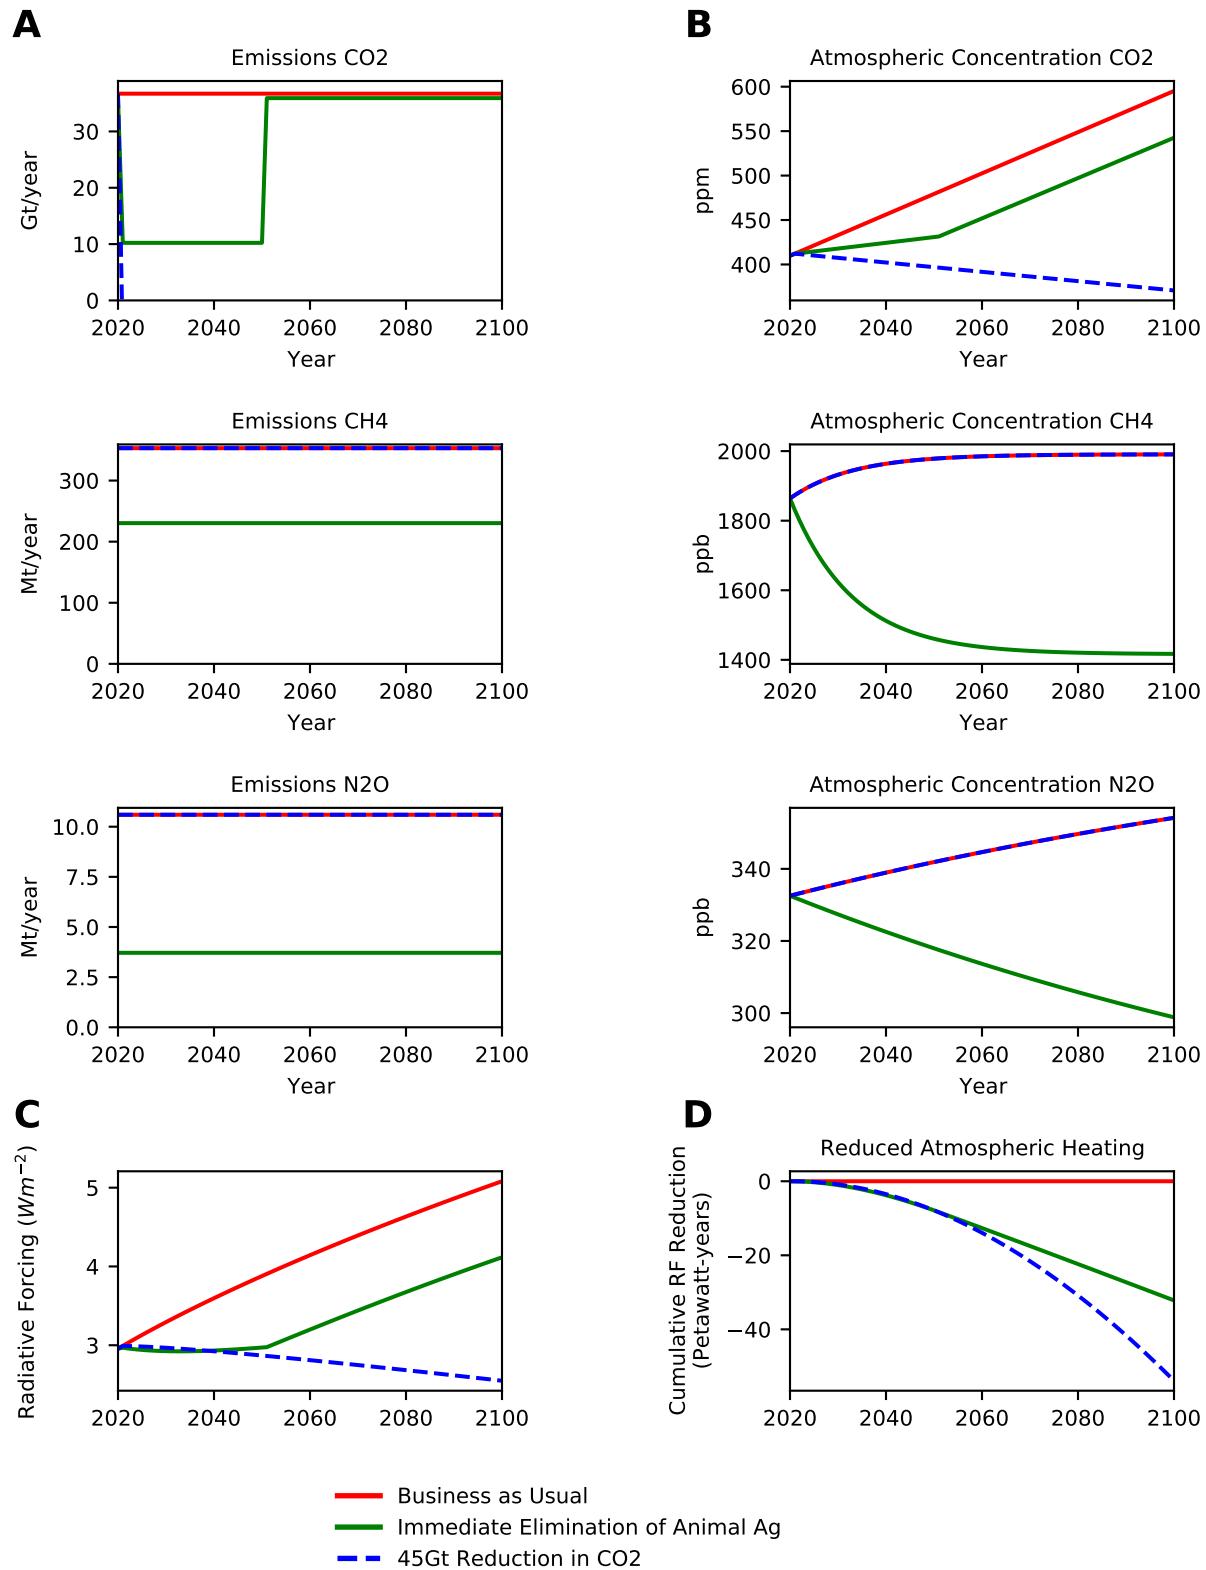

Figure 5-S4. ACO<sub>2eq</sub> Calibration for IMM-POD in 2050..

(A) Projected annual emissions of CO<sub>2</sub>, CH<sub>4</sub> and N<sub>2</sub>O for shown scenarios. (B) Projected atmospheric concentrations of CO<sub>2</sub>, CH<sub>4</sub> and N<sub>2</sub>O under each emission scenario. (C) Cumulative difference between scenario and BAU of Radiative Forcing.



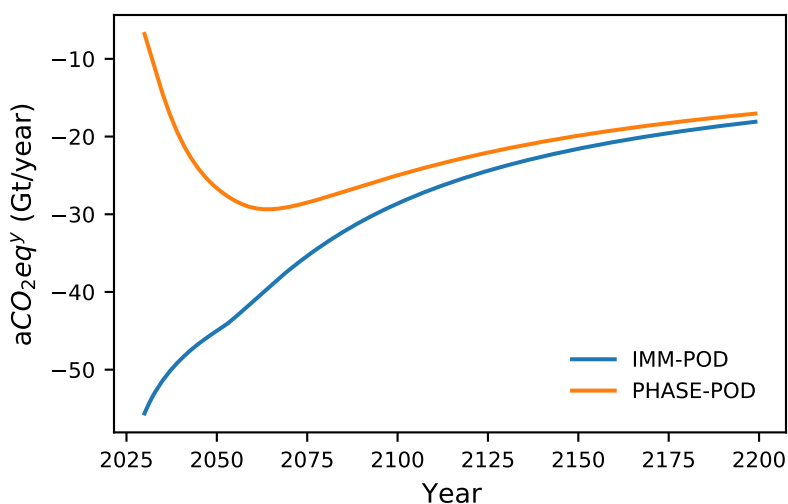

Figure 5-S5. Emissions reduction equivalents of ending animal agriculture

The equivalent  $CO_2$  emission reductions associated with different interventions in animal agriculture,  $aCO_2eq$ , vary with the time window over which cumulative warming impact is evaluated. These plots show, for immediate elimination of animal agriculture (IMM-POD) and a 15-year phaseout (PHASE-POD) how  $aCO_2eq^y$  which is the  $aCO_2eq$  from 2021 to year  $y$ , varies with  $y$ . Because all of the changes in IMM-POD are implemented immediately, its effect is biggest as it is implemented and declines over longer time horizons (the decline in the first 30 years, when biomass recovery is occurring at a constant high rate, is due to the slowing of annual decreases in atmospheric  $CH_4$  and  $N_2O$  levels as they asymptotically approach new equilibria). In contrast, PHASE-POD builds slowly, reaching a maximum around 2060 when biomass recovery peaks.

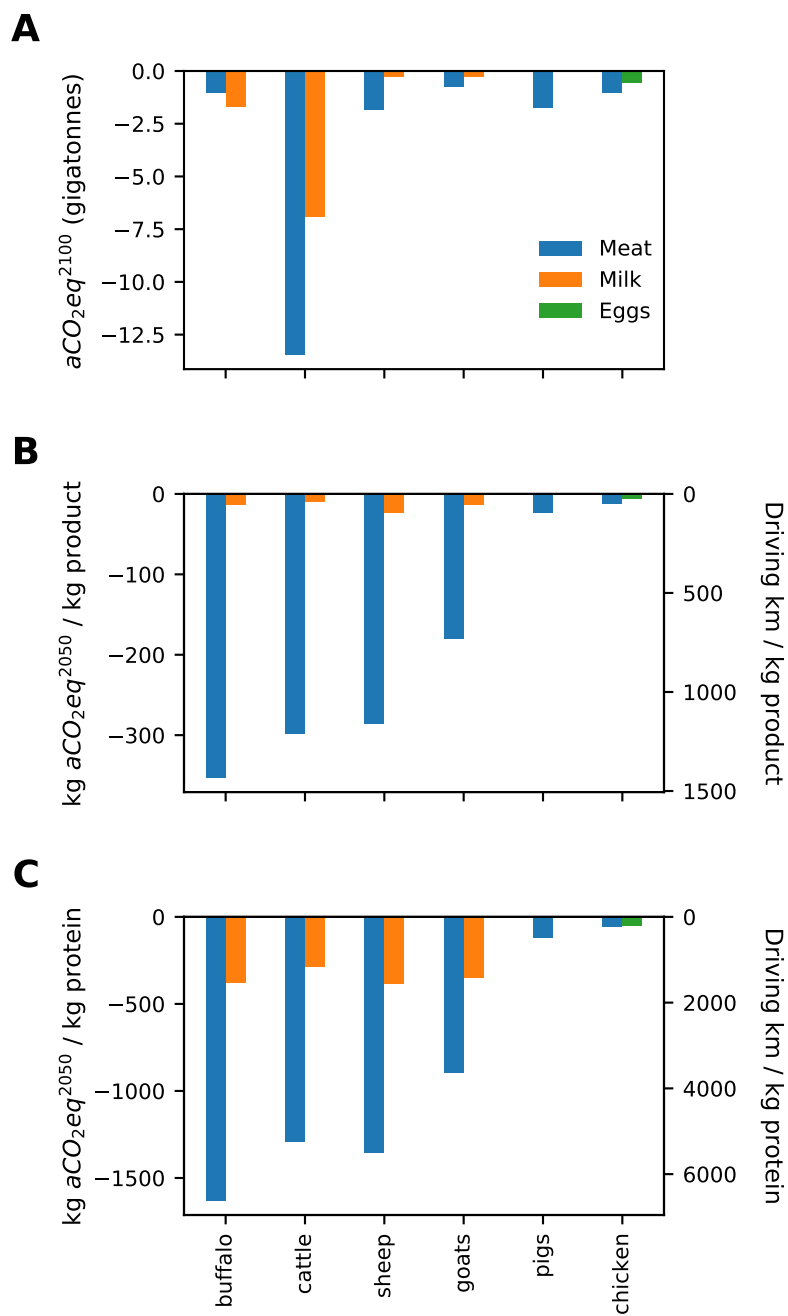

Figure 6-S1. Emission equivalents of livestock products through 2100.

We calculated the (A) total annualized  $CO_2$  equivalents through 2100,  $aCO_2eq^{2100}$ , for all tracked animal products, and the  $aCO_2eq^{2100}$  per unit production (B) or per unit protein (C). For (B) and (C) we also convert the values to driving equivalents, assuming cars that get 10.6 km per liter of gas (the average of new cars in the United States).
